# Supplementary material for: Genomic characterization of genes encoding histone acetylation modulator proteins identifies therapeutic targets for cancer treatment
Source: Nat Commun. 2019 Feb 13;10:733. doi: 10.1038/s41467-019-08554-x (PMC6374416; doi:10.1038/s41467-019-08554-x)
Supplement: Supplementary file 3 — Supplementary Data 1 [file 41467_2019_8554_MOESM3_ESM.xlsx]

## Sheet: Supplementary Table 1
Supplementary Data 1. List of the HAMPs in the human genome
Name	HGNC Symbol	Protein Groups	Ensembl Gene ID	Genomic Location
Lysine acetyltransferase 6A	KAT6A	Writer	ENSG00000083168	8:41929479-42051990
Lysine acetyltransferase 6B	KAT6B	Writer	ENSG00000156650	10:74825582-75032622
Lysine acetyltransferase 7	KAT7	Writer	ENSG00000136504	17:49788555-49835030
Lysine acetyltransferase 5	KAT5	Writer	ENSG00000172977	11:65711996-65719604
Lysine acetyltransferase 8	KAT8	Writer	ENSG00000103510	16:31115754-31131393
Clock circadian regulator	CLOCK	Writer	ENSG00000134852	4:55427903-55547138
Histone acetyltransferase 1	HAT1	Writer	ENSG00000128708	2:171922448-171983682
Elongator acetyltransferase complex subunit 3	ELP3	Writer	ENSG00000134014	8:28089673-28191156
Lysine acetyltransferase 2A	KAT2A	Writer and Reader	ENSG00000108773	17:42113108-42121358
Lysine acetyltransferase 2B	KAT2B	Writer and Reader	ENSG00000114166	3:20040023-20154404
TATA-box binding protein associated factor 1	TAF1	Writer and Reader	ENSG00000147133	X:71366239-71532374
TATA-box binding protein associated factor 1 like	TAF1L	Writer and Reader	ENSG00000122728	9:32629454-32635669
Alpha tubulin acetyltransferase 1	ATAT1	Writer	ENSG00000137343	6:30626842-30646823
CREB binding protein	CREBBP	Writer and Reader	ENSG00000005339	16:3725054-3880726
E1A binding protein p300	EP300	Writer and Reader	ENSG00000100393	22:41091786-41180079
General transcription factor IIIC subunit 4	GTF3C4	Writer	ENSG00000125484	9:132670035-132694955
Nuclear receptor coactivator 1	NCOA1	Writer	ENSG00000084676	2:24491914-24770702
Nuclear receptor coactivator 3	NCOA3	Writer	ENSG00000124151	20:47501902-47656877
SP140 nuclear body protein	SP140	Reader	ENSG00000079263	2:230203110-230313215
SP140 nuclear body protein like	SP140L	Reader	ENSG00000185404	2:230327184-230403732
SP100 nuclear antigen	SP100	Reader	ENSG00000067066	2:230415942-230544090
SP110 nuclear body protein	SP110	Reader	ENSG00000135899	2:230167293-230225729
Tripartite motif containing 28	TRIM28	Reader	ENSG00000130726	19:58544091-58550722
Tripartite motif containing 33	TRIM33	Reader	ENSG00000197323	1:114392777-114511160
Tripartite motif containing 24	TRIM24	Reader	ENSG00000122779	7:138460334-138589993
Tripartite motif containing 66	TRIM66	Reader	ENSG00000166436	11:8612037-8682694
Bromodomain adjacent to zinc finger domain 1A	BAZ1A	Reader	ENSG00000198604	14:34752731-34875647
SWI/SNF related, matrix associated, actin dependent regulator of chromatin, subfamily a, member 2	SMARCA2	Reader	ENSG00000080503	9:1980290-2193624
SWI/SNF related, matrix associated, actin dependent regulator of chromatin, subfamily a, member 4	SMARCA4	Reader	ENSG00000127616	19:10960825-11079426
ASH1 like histone lysine methyltransferase	ASH1L	Reader	ENSG00000116539	1:155335268-155562807
Bromodomain adjacent to zinc finger domain 1B	BAZ1B	Reader	ENSG00000009954	7:73440398-73522278
Polybromo 1	PBRM1	Reader	ENSG00000163939	3:52545352-52685917
Zinc finger MYND-type containing 8	ZMYND8	Reader	ENSG00000101040	20:47209214-47356889
Zinc finger MYND-type containing 11	ZMYND11	Reader	ENSG00000015171	10:134465-254637
Bromodomain containing 4	BRD4	Reader	ENSG00000141867	19:15235519-15332545
Bromodomain PHD finger transcription factor	BPTF	Reader	ENSG00000171634	17:67825524-67984378
Bromodomain containing 2	BRD2	Reader	ENSG00000204256	6:32968660-32981505
Bromodomain testis associated	BRDT	Reader	ENSG00000137948	1:91949371-92014426
Bromodomain containing 3	BRD3	Reader	ENSG00000169925	9:134030305-134068535
Lysine methyltransferase 2A	KMT2A	Reader	ENSG00000118058	11:118436490-118526832
CECR2, histone acetyl-lysine reader	CECR2	Reader	ENSG00000099954	22:17359949-17558149
KIAA2026	KIAA2026	Reader	ENSG00000183354	9:5881596-6007901
Bromodomain containing 1	BRD1	Reader	ENSG00000100425	22:49773283-49827512
Bromodomain and PHD finger containing 3	BRPF3	Reader	ENSG00000096070	6:36196744-36232790
Bromodomain and PHD finger containing 1	BRPF1	Reader	ENSG00000156983	3:9731729-9748018
Bromodomain containing 7	BRD7	Reader	ENSG00000166164	16:50313487-50368934
Bromodomain containing 9	BRD9	Reader	ENSG00000028310	5:850291-892824
Bromodomain adjacent to zinc finger domain 2A	BAZ2A	Reader	ENSG00000076108	12:56595596-56636816
Bromodomain adjacent to zinc finger domain 2B	BAZ2B	Reader	ENSG00000123636	2:159318979-159616692
ATPase family, AAA domain containing 2	ATAD2	Reader	ENSG00000156802	8:123319850-123416350
ATPase family, AAA domain containing 2B	ATAD2B	Reader	ENSG00000119778	2:23748664-23927114
Bromodomain containing 8	BRD8	Reader	ENSG00000112983	5:138139766-138178986
Bromodomain and WD repeat domain containing 3	BRWD3	Reader	ENSG00000165288	X:80670854-80809688
Bromodomain and WD repeat domain containing 1	BRWD1	Reader	ENSG00000185658	21:39184176-39321559
Pleckstrin homology domain interacting protein	PHIP	Reader	ENSG00000146247	6:78935867-79078236
Histone deacetylase 1	HDAC1	Eraser	ENSG00000116478	1:32292086-32333635
Histone deacetylase 2	HDAC2	Eraser	ENSG00000196591	6:113933028-114011308
Histone deacetylase 3	HDAC3	Eraser	ENSG00000171720	5:141620876-141636870
Histone deacetylase 8	HDAC8	Eraser	ENSG00000147099	X:72329516-72573103
Histone deacetylase 11	HDAC11	Eraser	ENSG00000163517	3:13479724-13506424
Histone deacetylase 10	HDAC10	Eraser	ENSG00000100429	22:50245183-50251405
Histone deacetylase 6	HDAC6	Eraser	ENSG00000094631	X:48801377-48824982
Histone deacetylase 7	HDAC7	Eraser	ENSG00000061273	12:47782722-47833132
Histone deacetylase 4	HDAC4	Eraser	ENSG00000068024	2:239048168-239401654
Histone deacetylase 5	HDAC5	Eraser	ENSG00000108840	17:44076746-44123702
Histone deacetylase 9	HDAC9	Eraser	ENSG00000048052	7:18086949-19002416
Sirtuin 6	SIRT6	Eraser	ENSG00000077463	19:4174109-4182604
Sirtuin 3	SIRT3	Eraser	ENSG00000142082	11:215458-236931
Sirtuin 1	SIRT1	Eraser	ENSG00000096717	10:67884669-67918390
Sirtuin 2	SIRT2	Eraser	ENSG00000068903	19:38878555-38899862
Sirtuin 7	SIRT7	Eraser	ENSG00000187531	17:81911939-81921323
Sirtuin 4	SIRT4	Eraser	ENSG00000089163	12:120302316-120313249
Sirtuin 5	SIRT5	Eraser	ENSG00000124523	6:13574529-13615158
