# Supplementary material for: Genomic characterization of genes encoding histone acetylation modulator proteins identifies therapeutic targets for cancer treatment
Source: Nat Commun. 2019 Feb 13;10:733. doi: 10.1038/s41467-019-08554-x (PMC6374416; doi:10.1038/s41467-019-08554-x)
Supplement: Supplementary file 4 — Supplementary Data 2 [file 41467_2019_8554_MOESM4_ESM.xlsx]

## Sheet: Supplementary Table 2
Supplementary Data 2. Summary of TCGA specimens
Abbreviations	Primary Site	Cancer Type	RNA-seq		SNP Arry	Exome-seq	Transcript fusion
			Normal	Tumor
LAML	Bone Marrow	Acute Myeloid Leukemia	0	151	191	141	179
ACC	Adrenal Gland	Adrenocortical carcinoma	0	79	90	92	79
BLCA	Bladder	Bladder Urothelial Carcinoma	19	408	408	411	408
LGG	Brain	Brain Lower Grade Glioma	0	511	513	512	516
BRCA	Breast	Breast invasive carcinoma	113	1090	1080	1020	1095
CESC	Cervix	Cervical squamous cell carcinoma and endocervical adenocarcinoma	3	304	295	289	304
CHOL	Bile Duct	Cholangiocarcinoma	9	36	36	36	36
COAD	Colon	Colon adenocarcinoma	41	456	451	406	290
ESCA	Esophagus	Esophageal carcinoma	11	161	184	184	184
GBM	Brain	Glioblastoma multiforme	5	161	577	393	172
HNSC	Head and Neck	Head and Neck squamous cell carcinoma	44	500	522	507	520
KICH	Kidney	Kidney Chromophobe	24	65	66	66	66
KIRC	Kidney	Kidney renal clear cell carcinoma	72	530	528	369	533
KIRP	Kidney	Kidney renal papillary cell carcinoma	32	288	288	281	290
LIHC	Liver	Liver hepatocellular carcinoma	50	371	370	363	371
LUAD	Lung	Lung adenocarcinoma	59	513	516	567	516
LUSC	Lung	Lung squamous cell carcinoma	49	501	501	485	501
DLBC	Lymph Nodes	Lymphoid Neoplasm Diffuse Large B-cell Lymphoma	0	48	48	37	48
MESO	Pleura	Mesothelioma	0	86	87	82	87
OV	Ovary	Ovarian serous cystadenocarcinoma	0	374	582	412	422
PAAD	Pancreas	Pancreatic adenocarcinoma	4	177	184	177	178
PCPG	Adrenal Gland	Pheochromocytoma and Paraganglioma	3	178	162	179	179
PRAD	Prostate	Prostate adenocarcinoma	52	495	492	497	497
READ	Rectal	Rectum adenocarcinoma	10	166	165	150	94
SARC	Soft Tissue	Sarcoma	2	259	257	236	259
SKCM	Skin	Skin Cutaneous Melanoma	1	468	469	466	469
STAD	Stomach	Stomach adenocarcinoma	32	375	441	439	414
TGCT	Testis	Testicular Germ Cell Tumors	0	150	150	145	150
THYM	Thymus	Thymoma	2	119	123	123	120
THCA	Thyroid	Thyroid carcinoma	58	502	499	492	505
UCS	Uterine	Uterine Carcinosarcoma	0	56	56	57	57
UCEC	Uterine	Uterine Corpus Endometrial Carcinoma	35	543	539	530	180
UVM	Eye	Uveal Melanoma	0	80	80	80	80
Total			730	10201	10950	10224	9799
