# Supplementary material for: Genomic characterization of genes encoding histone acetylation modulator proteins identifies therapeutic targets for cancer treatment
Source: Nat Commun. 2019 Feb 13;10:733. doi: 10.1038/s41467-019-08554-x (PMC6374416; doi:10.1038/s41467-019-08554-x)
Supplement: Supplementary file 5 — Supplementary Data 3 [file 41467_2019_8554_MOESM5_ESM.xlsx]

## Sheet: Supplementary Table 3
Supplementary Data 3. Summary of HAMP mRNA expression levels (FPKM value) in each cancer type
HGNC Symbol	Ensembl Gene ID	No. Detectable	ACC				BLCA				BRCA				CESC				CHOL				COAD				DLBC				ESCA				GBM				HNSC				KICH				KIRC
		Cancer Types	25th	50th	75th	90th	25th	50th	75th	90th	25th	50th	75th	90th	25th	50th	75th	90th	25th	50th	75th	90th	25th	50th	75th	90th	25th	50th	75th	90th	25th	50th	75th	90th	25th	50th	75th	90th	25th	50th	75th	90th	25th	50th	75th	90th	25th	50th	75th
KAT6A	ENSG00000083168	33	1.90862	2.56125	3.87998	4.98987	2.78086	3.99106	5.44696	7.23491	5.20001	7.7447	10.9728	16.1513	3.30365	4.40189	6.36525	7.89402	2.67929	3.83072	4.50554	6.28062	3.39148	4.80066	6.18019	8.15789	1.59804	2.60511	4.47843	6.76946	7.09761	9.15821	11.6608	18.1149	3.30722	4.65398	6.05637	7.29271	2.91142	4.42087	6.87738	9.99264	3.34031	4.64379	5.91229	6.9099	4.01182	5.41102	6.75818
KAT6B	ENSG00000156650	33	1.79568	2.14233	2.97071	4.54801	1.15784	1.79128	2.34349	2.94328	3.0936	5.34325	7.8695	12.9805	1.20419	1.70889	2.29754	3.07126	1.38545	1.89932	2.42846	3.54787	1.34208	1.77074	2.31976	2.91261	0.733966	1.29311	2.38034	3.4662	2.83552	3.61789	4.58904	5.32755	1.20192	1.77086	2.20284	3.09738	1.13518	1.62944	2.31398	3.45345	1.89689	2.46739	2.97452	3.43302	2.06206	2.71262	3.44147
KAT7	ENSG00000136504	33	1.85594	2.51902	3.01731	3.83516	2.83534	3.55394	4.34538	5.38452	4.05196	5.48463	6.95214	9.38812	2.97412	3.61956	4.32126	5.16534	3.1756	3.59648	4.33376	5.20483	2.92613	3.43609	4.18031	4.85057	1.35247	2.49614	3.54423	4.21042	3.87401	4.78944	5.8406	7.16528	5.18271	6.66524	8.47364	10.7798	2.53982	3.19326	4.06757	5.24644	2.26185	2.57956	3.09346	4.07959	3.48528	4.30986	5.08154
KAT5	ENSG00000172977	33	5.80344	7.74384	9.75746	11.5476	6.4595	7.85978	9.47725	10.7947	6.91811	8.42795	10.0905	11.7438	6.38826	7.63199	9.13542	10.5762	5.70899	7.8952	9.04887	9.77469	7.57372	8.68203	9.92294	11.9614	6.35284	8.19178	9.90453	10.7179	5.73064	6.82344	8.37868	9.58702	9.34888	10.643	12.2797	14.2236	6.55183	7.7164	9.11566	10.9568	10.1268	11.79	13.6574	15.2241	7.6478	9.29869	11.0898
KAT8	ENSG00000103510	33	10.6604	14.1402	18.1162	21.3592	5.88292	7.20148	8.98962	11.1657	7.32054	9.3891	12.6236	17.0441	6.7968	8.60819	10.6255	13.1197	8.15222	9.48157	10.6047	13.6275	7.96679	9.58514	11.0618	13.0652	8.39796	9.28796	10.6353	11.7628	5.44653	6.86342	8.19552	9.73153	8.99727	10.3265	12.4243	15.1887	4.45861	5.63503	7.34019	9.41258	9.57015	11.611	13.0206	14.884	7.28762	8.73261	10.4043
CLOCK	ENSG00000134852	33	2.17303	2.94531	4.39837	5.68069	1.85894	2.48728	3.23233	4.41683	3.45396	4.66528	6.23198	7.84269	2.33745	3.39079	4.19699	5.14844	1.96489	2.62866	3.26123	3.97464	2.20646	2.91529	3.86202	4.83527	0.565783	0.862817	1.41484	1.76758	3.93725	4.86227	6.46788	8.12899	1.8882	2.32284	2.92896	3.67361	2.2249	2.99948	3.92805	5.03764	1.73167	2.39322	3.50623	4.24792	2.74495	3.63548	4.70169
HAT1	ENSG00000128708	33	3.40764	4.49954	6.55053	9.20907	4.9844	6.61458	8.40157	10.5547	7.30744	8.79238	10.7371	12.9671	8.6631	10.7836	13.487	15.978	3.52456	4.70076	5.53929	6.11147	5.40939	6.73108	8.09653	9.60386	7.55262	9.22926	11.2589	12.8185	5.78095	7.38122	8.91064	10.9985	6.43734	7.72024	9.17927	10.7025	6.15324	7.70899	9.94279	12.6582	1.83978	2.37187	3.03676	4.48839	4.343	5.11221	5.79947
ELP3	ENSG00000134014	33	5.09532	6.77461	9.13822	12.6459	3.82841	4.93307	6.32102	7.72866	4.94947	6.52657	8.60944	10.879	4.50563	5.57587	6.71235	7.99085	5.00431	6.2045	7.47107	8.72624	4.45708	6.23899	7.94979	9.57215	6.75494	7.65792	9.04903	10.1693	2.85293	3.83044	4.89363	6.48883	7.87265	8.74767	9.82223	11.377	3.75551	4.70289	6.14803	7.70221	8.01959	11.4427	18.8063	42.1871	5.53394	7.0456	8.21539
KAT2A	ENSG00000108773	33	11.4441	16.1851	23.5961	35.7856	19.0175	25.3068	33.5288	47.4036	9.09998	13.242	18.8761	26.5413	15.4512	20.3529	26.4962	33.1932	20.5978	30.6511	40.7764	46.2366	19.9038	25.2584	32.6004	38.8145	12.2052	17.4164	22.1017	29.3143	13.5813	17.1198	22.5676	27.678	13.3288	20.3217	28.6143	39.4058	9.41589	13.2798	18.5703	25.2627	4.29397	5.56476	6.8736	10.5971	5.93678	9.45813	16.0484
KAT2B	ENSG00000114166	33	1.58996	2.47014	3.85386	5.80954	2.23709	3.62099	5.71247	9.01212	1.86148	2.67768	4.00046	5.34677	1.84292	3.03293	4.35838	5.89428	1.62716	2.79297	4.82649	5.43377	1.19562	1.79335	2.6992	3.57914	2.64914	4.75292	7.50935	9.36935	2.41831	4.0074	5.77668	8.50207	11.9779	14.9241	18.224	23.9341	1.5553	2.54349	3.79791	5.17474	3.26909	5.02349	7.59657	9.06269	5.20185	6.39124	7.82272
TAF1	ENSG00000147133	33	2.45397	3.59322	4.87153	6.11503	2.62888	3.58066	4.64256	5.90794	4.06522	5.50931	7.05359	8.50702	3.11381	4.08149	5.47476	7.63812	2.77603	4.00749	4.55976	6.28524	3.05487	4.2492	5.7538	7.38779	1.53673	3.45047	4.82474	6.27294	3.99938	5.28247	6.99732	8.94176	2.51428	3.34414	4.40162	5.12867	2.23856	3.13569	4.30119	5.40824	2.21455	2.95373	3.75042	4.33427	2.81852	3.70962	4.57302
TAF1L	ENSG00000122728	0	0	0.00276766	0.00749035	0.0122117	0	0.00232144	0.00498705	0.00869023	0	0.00363064	0.00707371	0.0133211	0	0.00300091	0.00630497	0.00990205	0	0	0.00415444	0.0066459	0	0.00579734	0.0121339	0.0253499	0	0.00351442	0.00774654	0.0132109	0.0158731	0.0263072	0.0408704	0.0686105	0.0108162	0.0201792	0.0312981	0.0435021	0	0.00291308	0.00658325	0.011294	0	0.00238966	0.0045006	0.0056339	0	0.00289292	0.00639501
ATAT1	ENSG00000137343	33	0.960877	1.3851	2.05151	2.61437	3.04406	4.61095	7.232	10.6251	2.76282	3.71018	5.12645	6.95155	2.16422	3.42104	4.98046	6.49494	3.47235	4.36146	6.51074	11.2706	2.80624	3.77464	5.22686	6.43127	1.66207	2.02567	2.65048	3.5604	2.68949	3.73593	5.44781	7.42465	9.72094	14.9018	21.9032	29.8343	1.01105	1.48549	2.11418	3.13636	0.530187	0.673127	0.961466	1.29071	1.33406	1.93281	2.78618
CREBBP	ENSG00000005339	33	3.49845	4.42973	5.76588	7.47832	3.91476	5.26269	6.76828	8.28737	7.00887	9.31977	12.0082	14.5192	5.31747	7.02535	9.12618	10.9845	5.3629	6.39677	8.39923	11.7486	4.85696	6.40901	8.06273	9.45808	2.9169	4.6032	7.03751	9.36713	9.63977	12.1708	15.6425	18.1397	4.09691	5.94073	7.74321	8.76329	5.00836	6.98881	9.3894	11.798	5.84206	7.4684	8.3862	9.25087	5.65449	7.02964	8.79485
EP300	ENSG00000100393	33	3.30396	4.90997	7.03341	8.4854	6.31864	8.78351	11.9873	15.2029	9.93659	13.4467	16.7887	21.1932	6.42291	9.18997	12.2321	14.8596	6.67936	9.48848	12.0238	14.9772	7.06598	9.52452	12.2254	14.9392	2.08391	4.85323	10.2792	15.9628	16.1575	19.5068	24.2024	30.3975	4.97042	6.50785	9.04278	11.3467	7.56819	11.4576	15.4537	19.1089	9.73925	12.2901	14.953	17.3948	9.08802	11.7196	14.5113
GTF3C4	ENSG00000125484	33	1.90467	3.2886	4.50308	5.97512	2.75241	3.84394	5.01644	6.63272	5.54141	7.56357	9.99667	12.4045	4.19994	5.38222	6.8084	8.56259	2.61293	3.37325	4.84112	5.35767	4.13685	5.22051	6.24677	7.05894	2.06532	2.81687	4.22891	5.51082	5.13529	6.98708	8.68603	10.4081	3.67576	5.27114	6.80533	7.89836	4.41159	5.99278	7.8111	9.4717	2.36695	3.36605	4.32674	5.15458	2.80835	3.79992	4.87281
NCOA1	ENSG00000084676	33	4.1497	5.57331	6.91568	8.75491	4.27075	6.16942	7.92183	10.8133	6.67461	8.90796	11.477	14.4269	3.78762	5.20493	6.68083	8.55616	3.78672	5.34245	6.55992	7.56616	3.40244	4.29583	5.5589	6.66756	4.14551	5.6514	9.74857	13.1714	7.92923	10.6164	13.3285	16.3889	8.17619	10.7634	13.4351	16.8566	3.3824	4.78478	6.69319	8.76311	5.09817	6.65976	8.0709	12.006	6.11518	7.89313	9.95394
NCOA3	ENSG00000124151	33	3.46469	4.58634	6.77057	8.41226	7.00874	10.4469	14.4191	20.2698	6.8651	9.25332	12.5111	17.346	6.51054	8.50889	11.9511	15.2761	4.73985	5.99022	8.23588	10.6493	4.58253	6.4267	8.55854	10.9707	11.9976	15.2836	25.4514	29.2868	11.0751	14.3418	19.4556	25.8506	3.21433	3.9738	4.87495	5.87526	7.17742	10.2088	13.0457	16.9881	4.32348	6.15345	6.99567	9.04226	5.36522	7.28036	9.28692
SP140	ENSG00000079263	23	0.0573093	0.0840534	0.145762	0.282942	0.143324	0.378881	0.891818	2.22361	0.287589	0.551356	1.01798	2.04538	0.289172	0.544653	1.1024	2.05903	0.170541	0.395238	0.82409	1.75137	0.172622	0.329061	0.566816	1.00043	16.5744	20.5988	31.4139	39.3616	0.196027	0.470988	0.953043	1.77009	0.265235	0.412139	0.612446	1.00825	0.250534	0.512245	1.08517	1.9403	0.0452561	0.0771423	0.154011	0.238811	0.344258	0.582562	1.01796
SP140L	ENSG00000185404	33	1.99	2.58716	3.68743	4.82037	2.52066	3.60215	5.00761	6.38743	1.45099	2.42544	3.58023	5.34066	1.9578	3.17639	4.42128	5.79278	3.03451	4.04326	5.35212	6.42603	1.96362	2.87725	3.87437	5.18996	4.19081	5.91885	7.71029	8.86916	3.16666	4.73266	6.35535	7.60888	1.13759	1.8634	3.00276	3.68038	2.55376	3.54448	4.94299	6.55994	1.30347	1.78115	2.36189	2.76617	2.44157	3.26833	4.06217
SP100	ENSG00000067066	33	3.36594	4.73044	5.75787	6.71101	3.10095	4.53422	6.64364	8.62999	3.9466	5.26512	6.84415	8.77166	3.22413	4.50056	6.12555	7.98113	5.48778	6.58233	7.7424	9.57015	2.97929	3.96674	4.93879	6.36995	7.86637	10.0832	11.8209	13.3707	4.15262	5.9453	8.3797	10.2477	2.09874	3.18666	4.16176	6.37046	4.19941	5.80914	8.07656	10.205	2.89105	3.22463	4.20031	5.18899	5.2163	6.15528	7.16471
SP110	ENSG00000135899	32	0.507928	0.704091	0.868176	1.24583	0.640971	0.995175	1.70658	2.47898	1.21152	1.68985	2.43017	3.56943	0.757943	1.20227	1.8192	2.47376	0.886626	1.21701	1.56565	1.69876	0.447782	0.665511	0.945013	1.27038	2.74213	4.30074	5.3566	7.17082	0.932149	1.36627	1.99846	2.89924	0.805751	1.04845	1.37538	1.82972	1.01191	1.58425	2.62564	3.89331	0.41544	0.557344	0.703313	0.918486	1.17769	1.48702	1.82441
TRIM28	ENSG00000130726	33	47.7787	65.0043	89.3254	114.392	78.9338	101.225	129.725	161.522	63.7634	78.942	96.0537	122.548	86.6143	107.08	137.599	179.245	60.0016	73.6151	88.7108	103.376	88.9179	106.806	131.717	170.046	101.043	119.201	166.653	190.461	69.2156	88.9074	112.099	149.654	52.7566	73.7098	94.604	109.883	66.9062	84.6849	106.895	136.469	38.7321	49.0724	56.6901	68.4785	36.7685	41.3547	47.9778
TRIM33	ENSG00000197323	33	1.8243	2.39804	2.91686	3.3766	4.045	5.63384	7.20756	9.03123	5.30441	6.97561	8.83208	10.5348	4.05456	5.36891	6.59488	7.89843	3.74679	4.97084	5.78939	7.09578	3.07759	4.16035	5.04314	6.04221	2.17487	2.9339	4.19528	5.8824	6.82298	8.73031	10.8931	13.4051	3.74203	4.56014	5.42315	6.36841	3.10178	3.98279	5.08372	6.18628	2.48376	3.49424	4.28944	5.06045	3.83395	4.71291	5.76755
TRIM24	ENSG00000122779	33	8.59676	11.6969	15.7394	22.531	4.01175	7.10776	10.9864	18.6449	4.3242	5.60678	7.2324	9.5221	2.41373	3.71174	5.03947	6.72116	2.40576	3.02978	3.69723	5.31249	3.91473	5.1722	6.80219	8.2033	1.94214	2.3666	3.04811	3.77491	3.29652	4.61756	6.76977	9.65012	6.3793	9.06812	13.534	18.9214	1.70083	2.40008	3.5885	5.48583	2.28694	2.6545	3.33516	4.59815	2.42018	2.9394	3.46513
TRIM66	ENSG00000166436	32	0.368406	0.550697	0.860784	1.14067	0.494458	0.77611	1.12859	1.55087	0.781959	1.26654	2.02676	2.79316	0.515658	0.799608	1.23152	1.57601	1.06305	1.32993	1.7352	2.71557	0.720665	1.07659	1.50864	1.94614	0.765853	1.09864	1.89581	2.32074	1.02616	1.46982	2.07404	2.83304	0.607107	0.97456	1.61994	2.14113	0.449836	0.644493	0.944366	1.2849	0.395932	0.529554	0.728983	1.05186	0.81905	1.34237	2.11691
BAZ1A	ENSG00000198604	33	1.51955	2.07515	2.43842	3.23346	6.15607	8.19591	11.1311	14.2422	6.55828	8.51286	11.1215	14.0515	7.81413	10.5216	13.5597	16.5402	3.26501	5.18885	6.52048	7.76084	4.93187	6.63189	8.30098	9.80834	6.51724	8.12065	12.9879	17.4897	11.8869	15.1416	19.4357	25.7777	2.61514	3.37402	4.26601	5.41323	8.08854	10.7111	13.6644	16.0544	0.964821	1.52657	2.09216	3.40137	3.49727	4.49923	5.83044
SMARCA2	ENSG00000080503	33	7.26299	9.925	15.1613	18.2885	6.98564	9.86009	14.9675	21.2983	15.2751	21.2289	27.8007	34.7211	8.26532	11.9435	15.8116	21.4258	5.88575	9.28139	12.2734	15.3053	7.60104	10.4145	13.8854	16.618	8.92057	13.2694	23.3183	39.5274	6.68652	10.1191	12.9545	17.6741	8.4349	11.6573	15.1466	18.2118	6.08208	9.41225	13.8206	21.6188	10.1974	14.9655	17.5739	20.3679	11.0204	14.6433	18.7347
SMARCA4	ENSG00000127616	33	8.75177	12.3658	14.4285	18.6114	14.7877	18.5065	23.5497	30.1632	12.8951	15.5303	19.547	25.3335	13.1994	16.5833	21.2984	25.8032	13.564	17.1444	20.1213	23.4137	14.9587	18.923	22.5005	26.8408	10.9529	13.3095	17.6011	24.8108	13.6886	16.8007	20.7759	24.5197	10.1096	14.5746	19.4095	26.5063	12.4318	15.8036	20.4697	24.7227	10.1726	10.8794	12.9846	15.1847	7.47692	8.57038	10.0553
ASH1L	ENSG00000116539	33	2.39467	3.36625	4.34991	6.14264	3.02047	4.35858	5.74394	7.90985	6.86276	10.4527	14.2193	18.7111	3.53121	5.14659	6.97666	9.14555	4.29872	5.90958	9.74259	12.6761	2.96745	4.09878	5.56864	7.1773	0.928345	1.74886	3.21793	4.28104	7.17014	9.0778	11.453	15.0188	3.76663	5.16762	6.72037	7.93664	3.26239	4.7603	6.53523	8.49996	2.51428	3.3792	4.34292	5.29784	4.23213	5.85496	8.08374
BAZ1B	ENSG00000009954	33	11.0598	15.6049	18.1711	21.5337	12.5295	16.547	20.7782	24.9495	17.2097	21.2259	26.3091	32.2534	14.3683	17.8031	21.5479	25.4897	13.2598	15.7275	19.0195	21.3558	13.5079	16.8377	20.5784	24.7745	10.4584	16.1783	24.1738	32.1199	17.4914	20.5797	24.0741	29.956	14.5903	19.4858	24.649	30.8485	11.9785	15.5318	20.7596	25.6886	11.5157	14.4517	16.8189	18.9578	12.126	14.8343	17.3415
PBRM1	ENSG00000163939	33	2.27375	3.02748	3.75403	4.57265	4.28035	5.83181	8.49661	11.0185	5.82119	7.90482	10.5764	13.1445	3.916	5.43918	7.62132	9.27713	1.79836	2.98236	4.09874	5.04649	4.22148	5.46797	6.59756	8.11689	3.0566	5.02369	6.66823	9.33802	5.81348	7.15305	9.69792	11.3509	3.50301	4.39489	5.80178	7.29423	3.35699	4.5601	6.03377	7.59631	2.66626	3.59488	4.59006	5.11947	2.62702	3.57568	4.65656
ZMYND8	ENSG00000101040	33	12.7143	18.1752	28.1611	43.0099	6.61436	10.1071	14.716	20.6143	7.21064	10.159	14.2133	19.1432	5.06903	6.3859	8.32362	11.4314	4.35836	6.11308	8.81187	10.1501	8.29654	11.8904	16.6231	22.0243	4.21645	4.85878	6.69767	7.34143	9.97022	12.8736	17.6668	22.3896	5.75553	7.32092	8.92917	10.9715	4.03263	5.18321	7.22826	9.81024	4.65895	6.53696	7.79442	9.63235	4.96467	6.02634	7.61017
ZMYND11	ENSG00000015171	33	7.61096	10.3665	12.8683	17.9445	10.5203	14.0565	18.5881	23.6401	19.801	25.9347	32.5698	38.2197	8.52146	11.629	14.3255	17.7532	11.8478	16.1514	19.4694	24.0859	9.43085	12.145	14.6207	16.5401	2.10963	3.69494	6.00143	7.6435	10.5429	14.5117	18.7755	21.6905	10.5359	12.7186	14.7701	20.2927	7.07611	9.12221	11.6292	14.8306	12.1037	17.4928	22.2831	25.5395	12.9309	16.7236	20.2714
BRD4	ENSG00000141867	33	7.2478	8.53733	10.7029	14.2253	8.25054	9.99196	11.7956	14.143	7.60879	9.09912	10.945	13.2382	8.23749	10.3782	12.3947	14.4328	8.54173	9.67581	10.5177	12.7453	8.02696	9.46762	11.3505	12.9758	6.80455	10.206	11.8377	13.6173	13.5699	16.152	21.3528	25.0857	6.80698	8.98452	10.5287	13.172	8.29232	10.2467	12.9716	16.4683	8.5562	9.82676	11.7567	13.4934	6.23642	7.37523	8.59515
BPTF	ENSG00000171634	33	1.88213	2.7815	3.55988	4.8434	3.39277	4.6998	6.09653	7.86024	5.2587	7.54771	10.209	13.834	3.31385	4.4386	5.44075	6.92566	4.06916	6.01453	7.31135	9.51915	3.00335	4.11208	5.29976	6.33671	2.52516	4.18182	6.32169	8.251	7.14294	9.14718	11.4517	13.5734	2.9636	4.28831	5.31193	6.44286	3.15424	4.21526	5.51414	6.71829	1.86079	2.8927	3.94743	4.45689	3.57883	4.93561	6.3245
BRD2	ENSG00000204256	33	17.5264	21.8465	29.0135	37.4862	25.6481	32.4237	40.9786	49.2538	31.4666	39.1821	47.0479	56.3436	32.3984	41.5899	48.9349	57.7975	26.7656	34.1074	37.1644	42.0082	24.1801	29.4222	35.9316	42.242	16.3767	28.7791	43.4629	52.3294	27.9637	32.1957	39.1397	47.0018	24.127	29.9219	34.1919	37.8055	24.8918	31.2502	38.2599	47.4893	20.3783	24.2116	28.8809	32.3043	22.7182	28.9948	35.5765
BRDT	ENSG00000137948	5	0	0	0.00506918	0.0104465	0	0.00551225	0.0172038	0.0827564	0.00414907	0.0164613	0.0658448	0.256218	0	0.003687	0.00939151	0.0183819	0	0.00472063	0.00657897	0.017614	0	0	0.00563284	0.0122447	0	0.00441297	0.0095209	0.0210679	0.00776819	0.0160011	0.0541207	1.22553	0.00852141	0.0157305	0.0223984	0.0328354	0	0.00399282	0.0181925	0.706692	0	0	0.00347917	0.00418716	0	0.00465819	0.0118601
BRD3	ENSG00000169925	33	2.34082	3.29918	5.63753	7.13034	3.02269	4.12706	5.8605	7.97131	5.35701	7.53994	9.74692	12.0391	3.43643	5.03631	6.72322	8.40258	2.72643	4.44244	6.3659	7.00363	4.40228	5.69713	7.12074	8.34076	1.05304	1.903	3.50133	4.51368	4.86142	6.47054	8.52697	10.3787	3.91502	5.84339	7.905	8.86633	3.31896	4.93844	7.02252	9.16623	3.12454	4.91358	6.3443	7.60119	2.7417	3.63207	4.53754
KMT2A	ENSG00000118058	33	1.5054	1.90101	2.39362	3.27842	1.82908	2.43921	3.28256	3.98568	2.70956	3.88489	5.22803	6.89201	1.74982	2.33195	3.20634	4.19118	2.11999	3.19087	3.80102	4.90072	1.90573	2.85103	3.63791	4.52696	1.97013	2.51914	4.91445	6.82532	4.39639	6.20272	7.71696	9.74318	1.79173	2.6867	3.66525	4.43961	1.59003	2.25687	3.23437	4.31421	2.22833	3.23569	3.90656	5.27974	3.1504	4.20767	5.34892
CECR2	ENSG00000099954	17	0.00832447	0.0299536	0.0699324	0.275167	0.0252953	0.221823	1.08171	2.53871	0.0319004	0.156419	0.745545	1.6676	0.0216686	0.0771249	0.758924	2.26496	0.0132784	0.0217669	0.0659983	0.16809	0.0199728	0.049742	0.200042	0.577897	0.0234926	0.0380079	0.068387	0.158479	0.0422964	0.137498	0.495713	2.07225	0.847737	1.30313	2.01741	2.93507	0.0495574	0.163945	0.610416	1.51551	0.0057329	0.0114001	0.113879	0.825794	0.0192347	0.0446164	0.08836
KIAA2026	ENSG00000183354	33	1.78345	2.62911	3.61127	4.82416	2.27331	3.09448	4.08366	5.3687	3.52681	4.76455	6.28421	7.74046	2.59568	3.45622	4.51986	5.64977	2.43858	3.20966	4.22428	5.68341	2.2365	3.03073	3.8161	4.6979	1.01025	1.7547	3.47916	5.36002	4.10592	5.5697	7.22479	8.71612	2.19629	2.87823	4.0999	4.93417	2.17072	3.1099	4.35121	5.89805	3.92904	5.09022	7.02323	8.48755	2.90047	3.82289	4.86192
BRD1	ENSG00000100425	33	3.02864	4.2418	5.60625	6.67017	5.96494	7.54113	9.94914	12.0981	5.82033	7.33251	9.17707	11.0976	6.99048	8.67956	10.5982	12.4381	6.40851	7.96981	9.39848	11.1539	6.73476	8.16136	9.62398	11.051	2.98524	4.71559	7.07132	8.81562	8.23396	9.72394	11.6787	14.4442	3.45413	4.64684	5.90589	7.43632	6.01253	7.58673	9.61129	11.8472	4.35939	5.57685	6.6904	8.58152	4.27661	5.39006	6.54338
BRPF3	ENSG00000096070	33	4.68206	9.78583	16.1601	24.4996	3.68328	5.05346	6.91446	9.56548	7.91162	10.8546	13.7828	17.1479	4.08399	6.00748	8.1996	10.8229	5.50334	8.00454	10.2837	12.2019	6.64042	8.40255	10.747	13.5877	1.35398	2.47158	4.1818	5.06306	6.60247	9.00022	12.6187	17.1492	4.64798	5.86739	7.15414	8.17964	3.12757	4.26502	5.74668	8.30396	5.52516	8.08298	9.94023	13.2169	5.7381	7.79758	9.82247
BRPF1	ENSG00000156983	33	2.93656	3.87847	4.71733	5.64166	4.73105	5.8536	7.75522	10.3161	4.63969	5.5461	6.60647	7.90332	4.13115	5.55185	7.14671	8.75499	2.51828	3.50062	3.89	5.3653	4.37015	5.22963	6.17047	7.18791	3.46206	5.838	7.58348	8.67734	4.05621	5.08695	6.35912	7.57758	3.97857	5.0017	6.04847	7.11733	3.3159	4.20613	5.27014	6.57187	3.69086	4.49154	5.35397	6.32217	2.75145	3.41088	3.98198
BRD7	ENSG00000166164	33	5.23514	6.57358	8.06915	9.78542	6.51833	7.84968	9.32732	11.1091	5.51663	6.90216	8.97126	11.0305	7.44509	9.09577	10.6655	12.7215	6.14275	7.27192	8.07768	8.77429	6.41913	8.00656	9.56521	11.6634	7.15057	8.21857	9.24044	10.1824	6.82411	8.1409	9.79554	11.038	6.27209	8.0216	9.81877	11.206	5.96178	7.23594	8.61338	10.4847	7.30316	8.82201	10.9253	12.6319	5.2614	5.94992	6.6145
BRD9	ENSG00000028310	33	3.13638	4.09084	5.11533	6.72988	4.09729	5.193	7.02727	9.55842	3.07961	3.71974	4.63631	5.46451	3.90916	4.91366	6.45064	8.65521	3.99719	4.76598	5.56525	7.40131	3.5921	4.3302	5.29361	6.27466	4.31354	4.89653	5.75794	7.31356	3.23773	4.13519	5.77813	7.379	3.42118	4.11568	4.94627	5.44696	3.09741	3.88689	5.17921	6.70582	2.51601	3.23278	3.94553	4.7289	2.71835	3.23849	3.83373
BAZ2A	ENSG00000076108	33	7.80848	10.1619	13.4909	16.485	7.51426	9.73823	12.2577	15.9388	9.92252	13.428	17.2801	20.8088	7.64917	10.5171	12.7927	15.8367	8.29754	12.3021	13.9937	18.0046	9.12943	11.8722	14.7691	17.5019	5.20109	8.72991	15.798	21.5282	12.8616	15.4789	18.7877	21.8986	4.64784	5.91546	7.41528	8.56482	9.13223	11.7522	14.8163	17.6768	8.51374	10.5653	12.9081	14.3148	9.31771	12.5753	15.1272
BAZ2B	ENSG00000123636	33	0.948948	1.24021	1.55924	2.09524	0.884346	1.28858	1.83569	2.43935	1.31237	1.88955	2.59534	3.43618	0.95621	1.3922	1.90561	2.45685	1.23199	1.67675	2.03899	3.18986	1.0458	1.47316	2.00188	2.5055	0.289083	0.470049	0.705959	1.15837	2.18391	2.85097	3.63742	4.42071	1.04982	1.37527	1.87378	2.37103	0.837358	1.16741	1.64803	2.32911	0.450225	0.829255	1.22649	1.62594	1.06375	1.52569	2.00816
ATAD2	ENSG00000156802	33	1.56849	3.02926	4.971	7.85672	4.55442	7.28264	11.2268	17.7469	5.98546	9.79161	17.0004	26.5372	10.9379	15.0038	19.4723	24.915	2.74514	3.98257	5.35751	8.71309	5.05993	7.32695	10.2584	13.0107	5.30442	7.258	12.3516	17.8502	8.74514	13.1694	17.4582	21.7997	3.21402	4.3744	6.63181	9.05305	5.56507	8.38085	12.9166	17.9527	1.01476	1.48889	2.06764	3.88516	1.30154	1.74763	2.33149
ATAD2B	ENSG00000119778	33	0.624294	0.740671	0.915525	1.30092	1.32993	1.78925	2.40538	2.92999	1.60823	2.08384	2.65009	3.31861	1.49928	2.08409	2.62353	3.17394	1.04041	1.52789	1.91201	2.26625	1.03401	1.35677	1.67139	2.05921	0.930997	1.46396	2.4304	3.28827	2.01663	2.46878	3.20082	3.91754	0.719647	0.975976	1.25719	1.5231	1.17923	1.54269	2.08448	2.61845	0.495339	0.633224	0.879379	1.14428	0.914402	1.2061	1.54907
BRD8	ENSG00000112983	33	6.44168	8.95422	11.2155	13.7996	4.78178	6.03927	7.77806	9.94035	6.72787	8.79048	11.0848	13.2999	5.95999	8.18441	10.4225	12.7635	6.37578	8.00912	10.2136	12.9609	5.72109	6.84411	8.16079	9.87686	5.00677	5.83242	7.68277	9.08261	4.19925	5.50553	6.87326	9.24247	8.56139	10.2228	12.3796	14.5244	3.27327	4.21069	5.61267	7.76603	2.97687	4.0799	4.95967	6.40148	5.47134	7.16929	9.08641
BRWD3	ENSG00000165288	33	0.553746	0.744141	0.992911	1.41324	1.17818	1.61124	2.32346	2.92309	1.40236	2.02345	2.81099	3.65792	1.62247	2.26986	3.12746	4.26862	1.08713	1.49247	1.8649	2.28717	1.49572	2.04852	2.83735	3.61466	0.603658	1.17636	1.99926	2.63916	2.55845	3.19775	4.30701	5.60357	0.74168	1.05623	1.42269	1.84512	1.18709	1.6925	2.29779	3.14367	1.08131	1.76413	2.35068	3.20319	1.2959	1.83412	2.43627
BRWD1	ENSG00000185658	33	2.15034	3.05454	4.0605	5.13874	2.27614	3.04934	4.04065	5.54188	3.65332	4.94534	6.54614	8.12439	2.53634	3.18188	3.74019	4.41911	1.90591	2.65251	3.29265	4.00488	1.74425	2.19723	2.74042	3.24687	1.58457	2.10352	2.63696	3.14647	2.65282	3.45409	4.40962	5.11901	2.35569	2.80408	3.41533	4.25182	1.86986	2.30437	2.90152	3.66335	1.22211	1.83115	2.26747	2.92769	2.3172	2.84213	3.49594
PHIP	ENSG00000146247	33	1.95278	2.36837	3.1686	4.50234	2.6354	3.59665	4.8686	6.43886	4.31888	6.01762	8.12674	10.3707	3.74254	5.0871	6.79466	8.4662	3.00259	4.12981	5.51622	7.85686	2.22478	2.9082	3.72059	4.64849	1.61801	2.68302	4.00467	4.88138	7.15478	9.13542	11.486	13.9598	1.96448	2.46341	2.98152	3.76356	2.41244	3.29611	4.56914	7.07135	1.1137	1.47348	1.98569	2.60657	3.4042	4.51584	5.66731
HDAC1	ENSG00000116478	33	17.1983	22.2038	31.5149	40.426	35.9083	44.4076	56.7403	68.099	24.4845	30.6767	38.5481	48.3506	49.1049	60.9368	76.7018	89.3168	20.5826	28.1836	38.4297	47.8427	54.8605	64.7004	77.3194	90.3608	47.2211	66.6265	97.8248	124.517	28.3211	36.8554	47.822	60.4647	16.229	19.612	22.7571	25.7698	36.3185	44.0341	55.5562	66.1643	10.9813	12.3116	14.1413	16.5689	19.4612	23.39	26.9784
HDAC2	ENSG00000196591	33	3.66341	4.95693	7.11195	9.61473	6.10352	8.09626	10.4058	12.8948	5.49422	7.00744	9.28836	14.3498	6.65877	9.04482	11.1432	13.3868	3.43026	4.05098	5.60547	7.35635	7.36972	9.25659	11.4093	13.586	4.09197	4.96677	5.71614	6.63867	5.65692	6.95445	8.7028	11.0596	4.02252	5.37298	7.0377	10.1622	5.10621	6.44229	8.22988	10.3338	1.95483	2.38724	2.89297	4.10545	3.42704	4.33121	5.0106
HDAC3	ENSG00000171720	33	11.2782	14.9602	17.6936	22.9969	10.0876	12.6853	15.2045	17.7374	10.1043	12.0393	13.9007	15.965	11.8269	14.7132	17.27	20.5358	10.4428	13.1323	14.6787	16.5343	11.069	12.7295	14.4818	16.3035	17.5412	20.4537	23.8355	25.4467	6.21829	7.50107	9.29414	10.8028	13.1472	14.7838	16.8934	18.4236	10.7076	13.1199	15.8467	17.9665	5.79575	7.3372	8.56959	9.42821	9.88681	11.9067	13.751
HDAC8	ENSG00000147099	33	5.01785	6.39066	7.82101	9.42199	3.23335	3.80804	4.53024	5.42143	3.03565	3.61684	4.29093	5.22323	3.74211	4.47187	5.87344	7.26235	3.16826	3.52744	4.00006	4.34274	2.89761	3.41082	4.33379	5.35196	2.93818	3.39813	3.80287	4.8356	2.19729	2.6677	3.34259	3.98593	2.66155	3.08197	3.45716	3.90913	2.15669	2.69159	3.21735	3.94669	2.9582	3.34008	3.693	3.9215	2.32816	2.57513	2.86567
HDAC11	ENSG00000163517	33	1.91252	2.69995	4.00868	5.62434	3.08836	4.34781	6.04448	8.02832	5.01126	8.01916	12.5745	18.3306	3.19614	4.3422	6.22491	8.12288	3.08235	4.13905	5.94826	6.97412	4.39037	5.7785	7.54143	9.50207	0.787068	0.971147	1.45698	2.03633	1.90586	2.5375	3.36865	4.80884	3.76658	4.95103	6.85838	8.97404	2.5138	3.26473	4.19312	5.84142	11.6292	14.9503	18.8248	21.7628	2.81127	3.67004	4.89494
HDAC10	ENSG00000100429	33	0.743295	1.00175	1.6949	2.61708	1.80072	2.53621	3.94741	5.29657	0.669882	0.985515	1.59566	2.33822	1.48559	1.9586	2.47231	3.37844	2.38311	3.30307	4.77625	6.69844	1.42494	2.02514	2.72811	3.70461	2.78528	4.03676	5.23052	6.8942	1.43228	2.00815	2.73701	3.25105	1.05102	1.56406	2.23894	3.24469	0.763724	1.15453	1.7622	2.40458	0.532864	0.67834	0.974674	1.36672	0.94046	1.50657	2.2951
HDAC6	ENSG00000094631	33	3.98829	5.33488	6.75201	8.18206	3.69128	4.97025	6.20488	7.9103	4.27475	5.19429	6.31453	7.46733	4.31547	5.61293	7.2351	9.42608	4.9852	5.83121	6.70866	8.94068	3.83121	4.8457	6.22437	7.56862	3.19973	4.84554	6.13257	6.9819	2.92333	4.08549	5.25233	6.79723	6.2158	7.63408	9.22315	11.4023	2.50179	3.23111	4.21869	5.34109	4.525	5.31334	6.31368	7.57733	6.47256	8.24063	10.2094
HDAC7	ENSG00000061273	33	9.01551	10.8401	15.3112	20.7476	9.49868	11.8431	14.8387	18.5175	6.8525	8.80182	11.1297	14.1968	8.1738	10.7291	13.7003	17.7501	12.547	16.8671	20.2797	26.2853	5.09597	6.21505	7.75805	9.63933	18.1878	23.5538	31.5019	44.8529	6.20179	7.92841	9.892	12.2902	4.60349	6.0328	7.76856	9.45017	6.0595	7.47956	9.06669	10.2708	5.12631	7.19507	9.30779	11.0313	7.66881	9.71786	12.2818
HDAC4	ENSG00000068024	33	0.928745	1.30009	1.94346	2.40436	0.556564	0.785688	1.11247	1.56892	0.835983	1.21155	1.66901	2.16035	0.949933	1.34312	1.9486	2.66974	0.863939	1.19204	1.47367	1.91796	1.40136	1.81875	2.27138	2.74108	0.541766	0.817329	1.22709	1.58319	2.07819	2.89008	3.90449	5.17478	1.63866	2.11839	2.6628	3.17971	1.21762	1.7937	2.51675	3.37641	0.541902	0.658318	0.824637	1.13128	0.830798	1.07674	1.39121
HDAC5	ENSG00000108840	33	4.88458	7.26599	11.463	13.5604	5.23564	7.0007	9.59959	12.2039	6.48095	9.01272	11.6491	14.8811	6.25362	8.45948	11.4258	14.5649	5.82329	9.98192	11.56	14.725	4.59075	6.54278	8.80416	11.2371	5.5318	7.27031	9.72079	11.6415	5.40566	6.86522	8.90095	10.8882	7.45406	8.98928	11.0326	13.7805	5.76038	7.3415	9.83827	12.3128	9.85421	11.3322	14.4958	16.9821	6.95459	8.83606	10.7815
HDAC9	ENSG00000048052	25	0.0634896	0.133907	0.314124	0.570965	0.0721126	0.158928	0.52827	1.11273	0.230966	0.386644	0.817159	1.59835	0.128558	0.266334	0.630153	1.34477	0.368407	0.557083	0.896723	1.11699	0.0919015	0.182632	0.325213	0.547162	0.440872	1.10677	2.23563	2.89345	0.324699	0.640588	1.63416	3.01309	1.17566	1.78956	2.31553	3.28916	0.219463	0.471846	0.825067	1.36136	0.0763261	0.185395	0.400911	0.928799	0.379834	0.551825	0.790061
SIRT6	ENSG00000077463	33	8.56668	11.0183	13.7822	15.6351	7.56478	9.48703	12.1573	15.0721	4.03623	5.19467	7.34173	9.76516	6.78513	8.3345	10.3775	13.4204	9.42518	10.718	13.0278	16.2776	10.0473	12.5826	15.8932	19.9653	11.2873	14.7592	21.1926	24.3728	5.3481	6.68136	8.31494	9.78387	6.89983	8.33017	10.5502	12.9815	5.57143	6.96191	8.79125	11.0806	5.92438	7.76938	9.03326	10.5437	4.40047	5.24651	6.67478
SIRT3	ENSG00000142082	33	3.29659	4.21409	5.30733	6.58956	2.46992	3.12032	4.02702	5.07394	3.44145	5.02818	6.9347	9.028	2.4143	3.01689	3.84332	4.91959	4.58609	5.56467	6.80694	7.87491	3.02852	3.59949	4.20736	4.75841	3.26704	3.79619	4.67958	5.21389	1.97858	2.40867	3.12182	3.5797	5.074	6.17794	7.29956	8.5597	2.30886	2.79315	3.62794	4.55116	4.56881	5.57969	6.82355	8.39906	4.73035	5.72521	6.78455
SIRT1	ENSG00000096717	33	3.3863	4.66081	6.50155	8.03016	2.84805	3.8619	5.19124	6.4934	5.66555	7.52257	9.39873	11.6413	3.34352	4.56738	5.94364	7.42066	4.08767	4.94184	5.87887	7.12695	4.06852	5.05211	6.28747	7.49458	2.00659	4.08081	6.21115	7.98699	4.41907	5.55085	7.41698	8.8954	2.89709	3.47717	4.03707	5.3311	2.54464	3.30954	4.15318	5.40541	2.34108	2.92266	4.2954	5.35448	5.25814	6.87048	8.68968
SIRT2	ENSG00000068903	33	9.95257	13.1723	17.7434	21.2124	7.5369	9.56589	12.0983	14.841	6.65698	7.94244	9.69709	11.8488	7.19872	8.97611	11.3479	14.6549	6.08454	7.20364	8.73066	10.9842	6.13662	7.22224	8.55746	10.0609	6.61251	7.88866	9.51948	10.0318	5.87148	7.43859	9.14284	11.2436	21.1336	28.7263	42.2826	70.1102	6.67168	8.14722	9.94341	12.1716	10.8267	13.5049	15.7911	19.8369	9.43272	10.7168	12.279
SIRT7	ENSG00000187531	33	1.46703	2.12087	2.68606	3.94129	5.81021	7.47999	9.90559	12.9188	2.60467	3.51949	4.77971	6.57293	5.23498	6.52687	8.05005	9.58966	4.21972	5.13584	6.17943	7.85677	4.62636	5.87083	7.49042	9.58321	6.02826	6.98756	8.02809	9.78149	3.5896	4.77181	6.61901	7.99145	2.43762	2.99076	3.57152	4.34644	3.67586	4.88452	6.26196	8.0666	1.21544	1.48343	1.83078	2.37187	1.85083	2.42553	3.22965
SIRT4	ENSG00000089163	30	2.50591	3.46504	5.35916	8.30293	0.347846	0.597868	0.893605	1.33546	0.660161	0.957707	1.29282	1.69576	0.601714	0.86711	1.27105	1.72612	0.713486	1.27241	1.95465	2.34674	0.272539	0.411432	0.609984	0.870392	0.627617	0.826559	1.07452	1.51288	0.255533	0.420701	0.629517	0.921828	1.14024	1.38908	1.8469	2.49763	0.343878	0.544375	0.816507	1.15315	1.30348	1.74205	2.26279	2.87355	0.820014	1.14961	1.54828
SIRT5	ENSG00000124523	33	2.08566	2.76064	3.42495	4.34823	2.45758	3.20564	4.07513	5.29617	2.42162	2.98074	3.82341	4.98303	2.24104	2.96302	3.90208	4.77423	3.55403	4.5064	5.37968	7.22754	3.21331	3.90503	4.88317	5.79451	2.10403	2.70792	3.54955	4.66003	1.58058	2.11595	2.76147	3.44143	1.89175	2.17089	2.47434	2.94409	1.76478	2.36215	3.1502	4.15917	5.27742	6.42714	8.32509	9.55298	2.71196	3.25067	3.83307
[truncated: 85 more columns]
