# Supplementary material for: Genomic characterization of genes encoding histone acetylation modulator proteins identifies therapeutic targets for cancer treatment
Source: Nat Commun. 2019 Feb 13;10:733. doi: 10.1038/s41467-019-08554-x (PMC6374416; doi:10.1038/s41467-019-08554-x)
Supplement: Supplementary file 7 — Supplementary Data 5 [file 41467_2019_8554_MOESM7_ESM.xlsx]

## Sheet: Supplementary Table 5
Supplementary Data 5. Summary of the G-score of the HAMPs in each cancer type
		ACC		BLCA		BRCA		CESC		CHOL		COAD		DLBC		ESCA		GBM		HNSC		KICH		KIRC		KIRP		LAML		LGG		LIHC		LUAD		LUSC		MESO		OV		PAAD		PCPG		PRAD		READ
HGNC Symbol	Ensembl Gene ID	Gscore_Amp	Gscore_Del	Gscore_Amp	Gscore_Del	Gscore_Amp	Gscore_Del	Gscore_Amp	Gscore_Del	Gscore_Amp	Gscore_Del	Gscore_Amp	Gscore_Del	Gscore_Amp	Gscore_Del	Gscore_Amp	Gscore_Del	Gscore_Amp	Gscore_Del	Gscore_Amp	Gscore_Del	Gscore_Amp	Gscore_Del	Gscore_Amp	Gscore_Del	Gscore_Amp	Gscore_Del	Gscore_Amp	Gscore_Del	Gscore_Amp	Gscore_Del	Gscore_Amp	Gscore_Del	Gscore_Amp	Gscore_Del	Gscore_Amp	Gscore_Del	Gscore_Amp	Gscore_Del	Gscore_Amp	Gscore_Del	Gscore_Amp	Gscore_Del	Gscore_Amp	Gscore_Del	Gscore_Amp	Gscore_Del	Gscore_Amp	Gscore_Del
KAT6A	ENSG00000083168	0.091537	0.002406	0.267948	0.04511	0.443232	0.048218	0.099419	0.017983	0	0.018044	0.184439	0.018484	0.033856	0.002256	0.43317	0.062958	0.001457	0.009757	0.140551	0.02717	0	0.003281	0	0.010457	0	0.000376	0.011052	0.001134	0.014233	0.000422	0.070279	0.045062	0.198178	0.031682	0.447379	0.028093	0.022335	0.002489	0.393216	0.045389	0.034031	0.001177	0.013819	0.001337	0.032109	0.107385	0.184819	0.03412
KAT6B	ENSG00000156650	0	0.002406	0.114036	0.025474	0.185211	0.032079	0.011748	0.009175	0.249175	0.006015	0.040884	0.024966	0	0.004511	0.075127	0.03295	0.007784	0.026644	0.040969	0.03194	0.02787	0.003281	0.0009	0.007177	0.01083	0.007142	0	0.001134	0.004996	0.004221	0.034484	0.035698	0.035157	0.017415	0.082836	0.040842	0.006847	0.002489	0.319103	0.099336	0.056224	0.001177	0	0.001337	0.009105	0.073057	0.124899	0.037401
KAT7	ENSG00000136504	0.03673	0.044509	0.115492	0.013268	0.467071	0.033181	0.063947	0.004404	0.019782	0.006015	0.026663	0.005041	0	0.004511	0.190931	0.01118	0.022097	0.012571	0.019202	0.010163	0	0.003281	0.004397	0.000205	0.032526	0.004135	0	0.001134	0.015278	0.007175	0.053114	0.00556	0.096022	0.002937	0.102089	0.008212	0.088541	0.002489	0.162813	0.043343	0.041605	0.021182	0.009615	0.036757	0.020673	0.011223	0.060999	0.041994
KAT5	ENSG00000172977	0.071741	0.068568	0.196727	0.011145	0.137581	0.089018	0.127109	0.008074	0	0.11428	0.005585	0.015844	0	0.015789	0.177578	0.044718	0.008356	0.034149	0.298208	0.019289	0.072276	0.003281	0.005391	0.000205	0	0.006391	0	0.001134	0.006685	0.011396	0.0173	0.035113	0.085041	0.032312	0.088315	0.018584	0.084744	0.002489	0.230534	0.043343	0.00186	0.028831	0.026121	0.012698	0.075392	0.005061	0.018116	0.037401
KAT8	ENSG00000103510	0	0.002406	0.086689	0.011676	0.087065	0.006917	0.022129	0.025323	0	0.006015	0.04813	0.00024	0.05425	0.004511	0.073758	0.001177	0.002932	0.006942	0.029131	0.015141	0	0.00164	0.004431	0.000205	0.023886	0.001504	0	0.016438	0.006598	0.014984	0.022614	0.000585	0.102307	0.013218	0.095534	0.013182	0.003114	0.002489	0.083769	0.030508	0	0.001177	0	0.000668	0.002977	0.012763	0.060133	0.001312
CLOCK	ENSG00000134852	0.031449	0.002406	0.100797	0.014064	0.087672	0.013032	0.128451	0.005505	0	0.078191	0.031736	0.006722	0	0.011278	0.139372	0.054133	0.321569	0.017825	0.093259	0.011615	0.010229	0.003281	0.007269	0.002871	0	0.000752	0	0.001134	0.132971	0.008864	0.033294	0.045939	0.103473	0.023499	0.510832	0.010589	0	0.0112	0.207561	0.047436	0.030668	0.017064	0.024709	0.017376	0.014798	0.023765	0.042148	0.026902
HAT1	ENSG00000128708	0.020575	0.009624	0.069692	0.041395	0.055521	0.033783	0.094936	0.006239	0.047726	0.006015	0.010868	0.013683	0	0.056388	0.2348	0.01118	0.002929	0.003377	0.131296	0.010785	0	0.003281	0.023755	0.001845	0.060621	0.004887	0	0.001134	0.002826	0.006542	0.062952	0.057059	0.049919	0.006924	0.128098	0.018152	0.004046	0.002489	0.365144	0.033484	0.02973	0.015298	0	0.001337	0.011663	0.08626	0.025077	0.023621
ELP3	ENSG00000134014	0.021881	0.002406	0.010507	0.104019	0.025899	0.13463	0	0.022754	0	0.084206	0.018411	0.082339	0	0.022555	0.078912	0.092967	0.007186	0.019326	0.00946	0.034637	0	0.014763	0	0.02276	0	0.003007	0	0.001134	0.003956	0.002321	0.00967	0.099194	0.013255	0.058748	0.004356	0.083846	0	0.027377	0.021821	0.34842	0.004957	0.037657	0.017653	0.022054	0.012761	0.156236	0	0.179786
KAT2A	ENSG00000108773	0.024125	0.1636	0.046743	0.018044	0.0501	0.095935	0.071769	0.036333	0.019782	0.006015	0.050872	0.005761	0.042465	0.002256	0.193638	0.037069	0.007878	0.029646	0.023769	0.014726	0	0.003281	0	0.00041	0	0.000376	0	0.015304	0.003523	0.012874	0.026544	0.036869	0.05556	0.009861	0.028975	0.051431	0.006641	0.021155	0.016782	0.15105	0.026829	0.034715	0.019064	0.120963	0	0.080979	0.040257	0.024934
KAT2B	ENSG00000114166	0.055659	0.007218	0.223685	0.024413	0.086077	0.027367	0.014459	0.021286	0.027537	0.165405	0.017053	0.038409	0	0.060899	0.015978	0.040011	0	0.020265	0.008904	0.021363	0.071969	0.003281	0	0.180442	0	0.006391	0	0.010203	0.025894	0.010763	0.057157	0.016386	0.017661	0.046369	0.012125	0.043436	0.024952	0.033599	0.112361	0.207601	0.033812	0.015298	0.002019	0.040766	0.011044	0.020025	0.025316	0.054461
TAF1	ENSG00000147133	0.008755	0.002406	0.050477	0.022555	0.020694	0.021252	0.038154	0.020185	0	0.006015	0.007172	0.005521	0.031593	0.015789	0.104371	0.027655	0.005169	0.000188	0.035179	0.0112	0	0.006562	0.000499	0.002666	0.00857	0.000376	0	0.001134	0.026653	0.001055	0.015317	0.00117	0.034801	0.015736	0.050607	0.035872	0	0.002489	0.143092	0.030508	0	0.007649	0	0.001337	0.008938	0.004841	0	0.016404
TAF1L	ENSG00000122728	0.124601	0.07338	0.071477	0.036619	0.03637	0.031778	0.006743	0.01468	0.185852	0.006015	0.007187	0.005521	0	0.004511	0.182511	0.04413	0.026645	0.099821	0.111234	0.036296	0	0.00164	0	0.00164	0	0.000376	0	0.001134	0.007006	0.02026	0.008618	0.016971	0.06989	0.026647	0.293171	0.04819	0.008744	0.114487	0.071675	0.092267	0.041767	0.010003	0.011803	0.000668	0.013527	0.019144	0.007192	0.000656
ATAT1	ENSG00000137343	0.005639	0.002406	0.168312	0.015391	0.098917	0.023959	0.195732	0.015047	0.080337	0.030074	0.034774	0.013443	0.051485	0.038344	0.18779	0.041776	0.003276	0.011446	0.050548	0.036503	0	0.003281	0.005474	0.003076	0	0.011654	0	0.001134	0.011058	0.004432	0.135601	0.006437	0.103891	0.012799	0.074597	0.044084	0.017972	0.024889	0.324958	0.051342	0.034845	0.005884	0	0.001337	0.013123	0.002861	0.071495	0.012467
CREBBP	ENSG00000005339	0.116672	0.021653	0.00561	0.222368	0.089171	0.040399	0.116901	0.020919	0.046308	0.054133	0.03052	0.030487	0.051469	0.004511	0.012471	0.074726	0.019417	0.016137	0.034488	0.034222	0.004224	0.003281	0.008407	0.00041	0.008983	0.006015	0.0237	0.001134	0.013517	0.002533	0.02315	0.028676	0.045295	0.037767	0.033155	0.111939	0.035007	0.018666	0.100214	0.288893	0.019251	0.016475	0	0.011361	0.013378	0.002421	0.020947	0.033464
EP300	ENSG00000100393	0.0414	0.002406	0.006462	0.11596	0.029009	0.030374	0.042246	0.066794	0.043393	0.006015	0.007305	0.020405	0	0.004511	0.031063	0.001177	0.00639	0.051412	0.031398	0.012859	0	0.003281	0.004943	0.000205	0.014013	0.007142	0	0.001134	0.001935	0.029757	0.034281	0.016679	0.038606	0.033151	0.059001	0.015343	0	0.04231	0.021198	0.247968	0.050569	0.026478	0	0.060816	0.00403	0.010782	0.006153	0.048555
GTF3C4	ENSG00000125484	0.101858	0.0409	0.035307	0.034496	0.044777	0.052729	0.067033	0.008441	0.057003	0.006015	0.019872	0.007682	0.047721	0.004511	0.117277	0.035304	0.034163	0.035651	0.069935	0.029451	0	0.00164	0.00174	0.006972	0.007825	0.005263	0.010412	0.001134	0.017644	0.007809	0.044512	0.033065	0.043453	0.026017	0.075499	0.020529	0.004652	0.039822	0.064776	0.25392	0.004299	0.001177	0	0.010025	0.02389	0.007042	0.050717	0.036744
NCOA1	ENSG00000084676	0.026993	0.037291	0.095326	0.010614	0.050245	0.043406	0.083159	0.003303	0	0.054133	0.008662	0.007202	0.021738	0.033833	0.056499	0.056486	0.023529	0.035463	0.031606	0.018252	0	0.003281	0.001138	0.002871	0.017833	0.013909	0	0.011337	0.005728	0.009497	0.092295	0.008486	0.052484	0.014267	0.089326	0.022906	0.028694	0.077154	0.185664	0.117194	0.006188	0.044718	0.009179	0.001337	0.017006	0.012323	0.005307	0.015091
NCOA3	ENSG00000124151	0.01475	0.002406	0.112395	0.006634	0.171355	0.022355	0.01339	0.042572	0	0.006015	0.124433	0.00048	0	0.004511	0.051678	0.002942	0.01606	0.006192	0.005593	0.014518	0	0.003281	0.009622	0.00041	0	0.003007	0	0.026074	0.00415	0.004221	0.044329	0.011412	0.093725	0.039445	0.08891	0.025067	0.021202	0.002489	0.391475	0.021951	0	0.001177	0	0.012029	0.042048	0.011883	0.115099	0.001312
SP140	ENSG00000079263	0.027756	0.045712	0.002273	0.3102	0.024501	0.092125	0.011717	0.36333	0	0.042103	0.024891	0.030247	0	0.004511	0.040241	0.146511	0.003585	0.013885	0.006651	0.182308	0	0.045931	0.010491	0.073612	0.037801	0.044734	0	0.003968	0.007716	0.062469	0.027357	0.049158	0.03437	0.037137	0.016012	0.196865	0	0.070932	0.140358	0.197742	0.065492	0.013533	0	0.012698	0.011406	0.027726	0.021423	0.023621
SP140L	ENSG00000185404	0.027756	0.045712	0.002273	0.311793	0.024264	0.091925	0.011717	0.36333	0	0.006015	0.02038	0.030247	0	0.004511	0.040241	0.146511	0.003585	0.013885	0.011438	0.184382	0	0.045931	0.010491	0.073612	0.037801	0.044734	0	0.003968	0.008372	0.062469	0.029949	0.049158	0.033204	0.037137	0.020025	0.197946	0	0.070932	0.143224	0.19737	0.065492	0.013533	0	0.012698	0.013047	0.027726	0.023047	0.023621
SP100	ENSG00000067066	0.028267	0.060147	0.002273	0.31365	0.022125	0.090622	0.016134	0.36333	0	0.006015	0.02038	0.030247	0	0.004511	0.040241	0.155337	0.000634	0.00713	0.006651	0.186249	0	0.045931	0.010491	0.073612	0.037801	0.039096	0	0.003968	0.003983	0.065845	0.029949	0.049158	0.03504	0.038816	0.018096	0.197081	0	0.070932	0.146717	0.191417	0.065492	0.013533	0	0.012698	0.013047	0.023986	0.023047	0.023621
SP110	ENSG00000135899	0.027756	0.045712	0.002273	0.308874	0.023991	0.092526	0.011717	0.362963	0	0.042103	0.02038	0.030247	0	0.004511	0.040241	0.146511	0.000634	0.013322	0.006651	0.182308	0	0.045931	0.010491	0.072177	0.037801	0.044734	0	0.003968	0.007716	0.062258	0.027357	0.051206	0.03437	0.037137	0.016012	0.19384	0	0.070932	0.140358	0.20109	0.065492	0.013533	0	0.012698	0.008386	0.026846	0.021423	0.023621
TRIM28	ENSG00000130726	0.142797	0.013232	0.1483	0.043518	0.151215	0.055035	0.119728	0.051747	0.019025	0.072177	0.02152	0.033128	0.162298	0.029322	0.249547	0.062958	0.049889	0.116521	0.067583	0.046873	0	0.00164	0.01113	0.00041	0.003724	0.015789	0.016506	0.007936	0.011367	0.165669	0.070354	0.031016	0.04082	0.067771	0.126518	0.09357	0.028931	0.038577	0.178509	0.346374	0.049973	0.038834	0	0.03141	0.014212	0.004841	0.019699	0.039369
TRIM33	ENSG00000197323	0.020232	0.054133	0.066118	0.045376	0.056092	0.082502	0.010365	0.079272	0	0.147361	0	0.072737	0.026402	0.051877	0.091019	0.192994	0.006561	0.027019	0	0.154309	0	0.003281	0.002305	0.004921	0.003757	0.014661	0	0.011337	0	0.01224	0.004016	0.031016	0.009304	0.1368	0.020708	0.171582	0	0.327284	0.156102	0.140261	0.008402	0.016475	0.026447	0.263311	0.003722	0.038069	0.063195	0.083331
TRIM24	ENSG00000122779	0.033437	0.06135	0.039372	0.032639	0.085481	0.041101	0.035033	0.07707	0	0.021052	0.029702	0.003121	0.022573	0.08571	0.041743	0.178873	0.046095	0.007505	0.025235	0.139998	0.060459	0.00164	0.014703	0.010252	0.091606	0.000376	0	0.051015	0.112519	0.006331	0.052774	0.044769	0.089943	0.018674	0.079536	0.065045	0.037674	0.051021	0.496929	0.040553	0.011938	0.04766	0.007274	0.011361	0.024364	0.022885	0.028425	0.007874
TRIM66	ENSG00000166436	0.009127	0.042103	0.000905	0.097916	0.03985	0.091223	0.008989	0.051013	0.032322	0.006015	0.030821	0.003601	0.022293	0.004511	0.060603	0.071196	0.015767	0.038277	0.012242	0.056621	0	0.034448	0.004944	0.002256	0	0.000376	0	0.001134	0.008398	0.080829	0.032261	0.016971	0.013607	0.054972	0.012551	0.130955	0.015423	0.067199	0.011499	0.394925	0	0.042365	0.032138	0.072177	0.005738	0.009022	0.00814	0.006562
BAZ1A	ENSG00000198604	0.110655	0.034885	0.041306	0.059174	0.158573	0.022054	0.070209	0.004404	0.053537	0.018044	0.030954	0.014403	0	0.004511	0.170985	0.025889	0.009129	0.081996	0.066171	0.03194	0	0.003281	0.022173	0.001845	0.008655	0.004511	0	0.001134	0.009694	0.011818	0.057061	0.04155	0.595552	0.009232	0.131036	0.048406	0	0.019911	0.149534	0.114218	0.011347	0.010591	0	0.022054	0.024866	0.014303	0.01668	0.034776
SMARCA2	ENSG00000080503	0.088224	0.032479	0.133406	0.083852	0.1059	0.06145	0.142053	0.048077	0.032845	0.006015	0.02314	0.024006	0.08271	0.024811	0.071164	0.167105	0.007397	0.165118	0.169622	0.077154	0	0.027886	0.015579	0.001845	0	0.015037	0	0.001134	0.00591	0.087372	0.059755	0.044184	0.041454	0.121483	0.131064	0.112155	0.044812	0.055999	0.209963	0.189371	0.005495	0.068254	0.011137	0.03542	0.008105	0.059414	0.035518	0.047899
SMARCA4	ENSG00000127616	0.138881	0.022856	0.085109	0.045906	0.08829	0.045211	0.129191	0.053582	0	0.006015	0.020434	0.017524	0	0.033833	0.115966	0.107088	0.055456	0.005817	0.059695	0.031733	0	0.003281	0.002403	0.003486	0.001204	0.019548	0.034227	0.001134	0.010202	0.001055	0.049124	0.106217	0.016273	0.090431	0.090578	0.070016	0.091299	0.009955	0.581331	0.195509	0.009165	0.074138	0.00164	0.001337	0.005341	0.020905	0.032023	0.019028
ASH1L	ENSG00000116539	0.162749	0.021653	0.363114	0.013533	0.335629	0.005012	0.188018	0.00734	0.584286	0.006015	0.030922	0.00048	0.245353	0.004511	0.203757	0.004707	0.065177	0.00394	0.050769	0.006015	0	0.026246	0.032203	0.002871	0.005819	0.000376	0	0.001134	0.023681	0.000422	0.366246	0.003511	0.365586	0.00042	0.264171	0.002809	0.109335	0.002489	0.567866	0.021765	0.086904	0.002354	0.056882	0.001337	0.048347	0.029927	0.112097	0.001312
BAZ1B	ENSG00000009954	0.153236	0.002406	0.050062	0.016983	0.092718	0.021954	0.039582	0.014313	0	0.006015	0.005903	0.003601	0.095067	0.004511	0.170898	0.025889	0.052091	0.002815	0.043386	0.029866	0	0.00164	0.012863	0.002461	0.030665	0.000376	0	0.001134	0.009876	0.005065	0.084527	0.007315	0.02159	0.024339	0.102292	0.020529	0.019951	0.002489	0.167021	0.056737	0.016686	0.002942	0.003608	0.018712	0.034717	0.0011	0.012816	0.001312
PBRM1	ENSG00000163939	0.145267	0.010826	0.038516	0.161867	0.009234	0.166207	0	0.068996	0	0.195478	0	0.058574	0	0.063155	0.033543	0.130036	0.015907	0.045783	0.000718	0.06471	0	0.019685	0	0.177981	0	0.02857	0	0.014738	0.0096	0.056982	0.033811	0.076371	0.017382	0.05707	0.005898	0.111939	0	0.635901	0.082758	0.222297	0	0.047072	0	0.03542	0	0.031247	0.023072	0.070864
ZMYND8	ENSG00000101040	0.082912	0.002406	0.114789	0.006634	0.179166	0.019849	0.015562	0.042572	0.045845	0.006015	0.133135	0.00048	0	0.004511	0.071131	0.002942	0.012199	0.006192	0.005593	0.014518	0	0.003281	0.007458	0.00041	0	0.003007	0	0.026074	0.005838	0.007598	0.047253	0.011412	0.103926	0.036088	0.091717	0.013398	0	0.002489	0.439584	0.030136	0	0.001177	0.016184	0.012029	0.039636	0.010782	0.137158	0.001312
ZMYND11	ENSG00000015171	0.002795	0.033682	0.244108	0.02229	0.158356	0.029372	0.040718	0.033397	0	0.048118	0.017788	0.04441	0.068221	0.08571	0.069736	0.115914	0.01622	0.062482	0.032361	0.061184	0	0.04265	0.011663	0.017019	0.031928	0.018044	0.006077	0.023807	0.076759	0.019205	0.031956	0.033065	0.056535	0.087283	0.034515	0.129443	0.018682	0.170486	0.344614	0.178581	0.014086	0.046483	0.006116	0.011361	0.007094	0.032347	0.01502	0.031495
BRD4	ENSG00000141867	0.35262	0.002406	0.03435	0.049887	0.153509	0.031678	0.022688	0.070831	0	0.030074	0.01583	0.005041	0	0.024811	0.233201	0.056486	0.033065	0.000751	0.069961	0.019911	0	0.003281	0	0.004306	0.001204	0.000376	0.014304	0.001134	0.024569	0.000422	0.142405	0.037454	0.007081	0.024758	0.127312	0.036953	0.056066	0.002489	0.920151	0.075525	0.013228	0.004707	0	0.001337	0.012462	0.00044	0.033196	0.011155
BPTF	ENSG00000171634	0.173077	0.064959	0.202772	0.006369	0.56657	0.007518	0.151511	0.01835	0.121276	0.006015	0.123181	0.006001	0.048028	0.004511	0.223335	0.02942	0.029672	0.008444	0.071448	0.020118	0.020337	0.003281	0.018513	0.00041	0.044171	0.000376	0.01203	0.001134	0.064009	0.000422	0.209135	0.009656	0.162836	0.003777	0.214869	0.00497	0.121771	0.002489	0.254386	0.027159	0.068586	0.099439	0.02045	0.010025	0.026345	0.018044	0.0926	0.011155
BRD2	ENSG00000204256	0.032965	0.002406	0.08176	0.041926	0.079286	0.02466	0.087884	0.005872	0.051978	0.030074	0.031604	0.023285	0.022959	0.198486	0.146951	0.042953	0.005731	0.006004	0.021998	0.037955	0	0.003281	0.001648	0.004101	0	0.020676	0	0.001134	0.007568	0.003166	0.078046	0.009949	0.072504	0.012169	0.04481	0.052296	0.017972	0.024889	0.281549	0.057853	0.027716	0.006472	0	0.001337	0.008868	0.002421	0.064707	0.015091
BRDT	ENSG00000137948	0.020265	0.048118	0.05247	0.073503	0.049625	0.105157	0	0.046976	0	0.10225	0	0.065775	0	0.029322	0.002122	0.084729	0.005286	0.058542	0.007492	0.076947	0	0.003281	0	0.007792	0.00379	0.012405	0.013615	0.001134	0.00902	0.01013	0.014144	0.025457	0.052939	0.092739	0.048995	0.057266	0	0.388261	0.164123	0.168908	0	0.015887	0	0.232569	0.0131	0.072617	0.011424	0.045274
BRD3	ENSG00000169925	0.124078	0.0409	0.044438	0.02627	0.045366	0.062553	0.068854	0.009175	0.057003	0.006015	0.023474	0.006241	0.047721	0.004511	0.117238	0.035304	0.028969	0.038653	0.06985	0.026548	0	0.00164	0.00174	0.006972	0.010581	0.005263	0.010412	0.001134	0.017644	0.010974	0.083772	0.03365	0.047864	0.027696	0.078591	0.022906	0.048942	0.019911	0.072006	0.251316	0.010135	0.001177	0.017657	0.010025	0.025657	0.005721	0.050717	0.032151
KMT2A	ENSG00000118058	0.068905	0.050524	0.041542	0.109326	0.034251	0.217432	0.037949	0.299105	0	0.17142	0.011073	0.014883	0.142934	0.013533	0.04169	0.117679	0.030359	0.006942	0.054739	0.155761	0.017219	0.024606	0.015866	0.005331	0	0.059395	0.189224	0.028342	0.067174	0.009708	0.008239	0.091586	0.057784	0.076583	0.045483	0.089464	0.085626	0.04231	0.181903	0.144911	0.012494	0.015887	0	0.06282	0.015661	0.080979	0.027511	0.033464
CECR2	ENSG00000099954	0.061785	0.067365	0.154032	0.059174	0.057672	0.061551	0.047379	0.013579	0.076534	0.10225	0.011787	0.016804	0	0.004511	0.057118	0.127682	0.008782	0.025143	0.06344	0.041688	0	0.003281	0	0.004921	0.00183	0.007142	0.011238	0.001134	0.00572	0.012663	0.015391	0.041258	0.059887	0.041124	0.142987	0.081469	0.069599	0.048533	0.145336	0.099708	0.004018	0.024124	0	0.012698	0.006262	0.04291	0.06303	0.032808
KIAA2026	ENSG00000183354	0.117552	0.075786	0.167246	0.124452	0.095122	0.060247	0.207977	0.038902	0.032845	0.006015	0.011435	0.026646	0.042463	0.024811	0.17008	0.15063	0.011038	0.197767	0.249952	0.063673	0	0.003281	0.004002	0.003076	0	0.015037	0	0.001134	0.003567	0.091804	0.061051	0.031894	0.054205	0.118126	0.160739	0.095947	0.044812	0.047288	0.167673	0.20109	0.002504	0.081199	0.011558	0.021386	0.000804	0.047531	0.039487	0.054461
BRD1	ENSG00000100425	0	0.002406	0.010379	0.121267	0.061966	0.063255	0.031417	0.0734	0.009002	0.006015	0.004101	0.036969	0	0.090221	0.030306	0.028831	0.001497	0.103949	0.024019	0.043762	0	0.027886	0.001896	0.00082	0.011388	0.013533	0.001796	0.003968	0.001335	0.047274	0.072452	0.067592	0.022035	0.123372	0.055049	0.085575	0	0.06471	0.016223	0.644567	0.005808	0.099439	0	0.062152	0.005782	0.031907	0.006153	0.09383
BRPF3	ENSG00000096070	0.206568	0.002406	0.073667	0.036884	0.07272	0.028871	0.078518	0.000734	0.051978	0.030074	0.024884	0.010322	0.080615	0.004511	0.152785	0.044718	0.015936	0.002439	0.019068	0.030488	0	0.003281	0.004952	0.001435	0.012611	0.011654	0	0.001134	0.014714	0.000422	0.047552	0.038039	0.078138	0.014897	0.034774	0.052296	0.017972	0.006222	0.258229	0.054133	0.005203	0.006472	0	0.001337	0.008246	0.007262	0.062334	0.00853
BRPF1	ENSG00000156983	0.078115	0.007218	0.423123	0.022024	0.121526	0.021152	0.023424	0.013579	0	0.183449	0.002319	0.038649	0	0.047366	0.090756	0.04766	0.029572	0.015198	0.031633	0.021155	0.071969	0.003281	0.002324	0.181262	0	0.006391	0	0.001134	0.036036	0.010341	0.074366	0.007315	0.045627	0.04511	0.027121	0.033927	0.050449	0.063466	0.176643	0.211693	0.00898	0.015298	0.002019	0.040766	0.011083	0.062494	0.014451	0.058397
BRD7	ENSG00000166164	0.058826	0.037291	0.036593	0.02972	0.04571	0.056939	0.015435	0.06239	0	0.126309	0.040923	0.006481	0	0.042855	0.081333	0.005296	0	0.037339	0.025795	0.035674	0	0.003281	0	0.006151	0.004718	0.000376	0.018793	0.001134	0	0.003799	0.004881	0.017849	0.06375	0.041544	0.055122	0.023339	0	0.06471	0.068134	0.142307	0.006728	0.001177	0	0.025395	0.006121	0.075477	0.010943	0.001312
BRD9	ENSG00000028310	0.813439	0.031277	0.267489	0.014329	0.134922	0.018445	0.224004	0.01835	0	0.048118	0.039318	0.016564	0.165142	0.002256	0.367784	0.030008	0.046953	0.031523	0.161099	0.010785	0.032139	0.032808	0.007414	0.002871	0.030566	0.013533	0	0.001134	0.012108	0.061413	0.246601	0.011412	0.417876	0.006714	0.390174	0.010157	0.059851	0.002489	0.480936	0.040553	0.032781	0.008238	0.005903	0.000668	0.027588	0.011003	0.055087	0.019028
BAZ2A	ENSG00000076108	0.32377	0.016841	0.038021	0.033435	0.038173	0.042805	0.032314	0.003303	0	0.006015	0.020396	0.003361	0.119595	0.002256	0.075694	0.035304	0.101866	0.04597	0.014754	0.019289	0	0.003281	0.002627	0.001025	0.001287	0.000376	0	0.001134	0.024855	0.03039	0.047729	0.005267	0.113832	0.005665	0.030825	0.01383	0.019453	0.017422	0.207435	0.043157	0.033449	0.007061	0.07238	0.001337	0.008206	0.007702	0.019145	0.011811
BAZ2B	ENSG00000123636	0.019748	0.019247	0.106913	0.057051	0.038037	0.036489	0.053841	0.024589	0	0.048118	0.005201	0.018724	0	0.15112	0.102803	0.040599	0.00189	0.009945	0.038856	0.025096	0	0.003281	0.019557	0.001845	0.010598	0.004887	0	0.001134	0	0.004854	0.052707	0.063789	0.040598	0.009652	0.103688	0.025283	0.004046	0.002489	0.335796	0.050598	0.053015	0.01118	0	0.001337	0.021343	0.099903	0.010216	0.013123
ATAD2	ENSG00000156802	0.178915	0.002406	0.278216	0.025209	0.530168	0.015538	0.174814	0.012478	0.251484	0.006015	0.185143	0.00048	0.12591	0.004511	0.618697	0.007061	0.035625	0.010132	0.272234	0.001037	0.088181	0.003281	0.020023	0.00041	0.009984	0.000752	0.018487	0.001134	0.207566	0.00211	0.404916	0.009656	0.277584	0.006504	0.330851	0.01383	0.052694	0.014933	1.45612	0.034972	0.14163	0.001177	0.008058	0.010025	0.075122	0.005281	0.246764	0.001312
ATAD2B	ENSG00000119778	0.012835	0.063756	0.094339	0.008226	0.049624	0.039096	0.083159	0.003303	0	0.054133	0.008662	0.004801	0.021738	0.033833	0.056499	0.056486	0.017127	0.033962	0.034719	0.020326	0	0.003281	0.001138	0.002871	0.017833	0.013909	0	0.001134	0.005857	0.012874	0.081052	0.016679	0.05527	0.014267	0.081586	0.027228	0.028694	0.077154	0.17562	0.126681	0.006188	0.038246	0.009179	0.001337	0.021863	0.013863	0.005307	0.015091
BRD8	ENSG00000112983	0.239472	0.024059	0.026274	0.026536	0.030708	0.022655	0.030179	0.009909	0.094228	0.006015	0.009864	0.021125	0.036036	0.004511	0.031141	0.03295	0.010093	0.017262	0.009262	0.031733	0	0.003281	0.284492	0.002871	0.029591	0.019172	0	0.098062	0.006395	0.041153	0.086786	0.017264	0.011806	0.044901	0.022186	0.032847	0.025278	0.026133	0.128397	0.118868	0.014448	0.01471	0.003252	0.056137	0.029283	0.027066	0.020781	0.017716
BRWD3	ENSG00000165288	0.070314	0.012029	0.015791	0.025739	0.034715	0.022555	0.014787	0.019818	0	0.006015	0.022623	0.012483	0.008489	0.058644	0.069374	0.059428	0.011084	0.007881	0.03069	0.009541	0	0.006562	0.000499	0.003896	0	0.000376	0	0.001134	0.021786	0.002533	0.004368	0.002633	0.03559	0.02266	0.073755	0.026148	0	0.002489	0.100821	0.042041	0.005911	0.008238	0	0.001337	0.00597	0.007702	0	0.011155
BRWD1	ENSG00000185658	0.008903	0.044509	0.045877	0.043784	0.112154	0.018646	0.088131	0.02202	0.071514	0.030074	0.011117	0.018244	0	0.004511	0.02474	0.086494	0.000768	0.015761	0.018538	0.047288	0	0.003281	0.002006	0.003896	0	0.000376	0.147245	0.001134	0.001275	0.007387	0.01721	0.013167	0.046739	0.02329	0.026224	0.062452	0	0.002489	0.143651	0.119612	0.009726	0.010591	0.012843	0.001337	0.015896	0.292888	0.001525	0.07677
PHIP	ENSG00000146247	0.055685	0.018044	0.026206	0.076157	0.06593	0.079896	0.025637	0.013212	0	0.213523	0.004485	0.017524	0	0.286451	0.030544	0.07355	0	0.039966	0.026419	0.036918	0	0.00164	0	0.006151	0	0.000752	0	0.001134	0.001145	0.003799	0.026761	0.046232	0.033072	0.043642	0.101125	0.027012	0.009097	0.028622	0.154782	0.108265	0.004218	0.017652	0.009413	0.001337	0.003184	0.200686	0.012139	0.013779
HDAC1	ENSG00000116478	0	0.030074	0.029288	0.074034	0.04698	0.092426	0.057346	0.018717	0	0.613502	0.017304	0.093382	0	0.099243	0.051874	0.066489	0.02239	0.036964	0.047812	0.046459	0	0.003281	0	0.037524	0	0.055636	0.021761	0.001134	0.002648	0.011607	0.01154	0.172931	0.048147	0.036298	0.042058	0.056618	0.110382	0.073421	0.30782	0.234388	0.013541	0.026478	0.022119	0.073513	0.025166	0.015184	0.009118	0.11089
HDAC2	ENSG00000196591	0.019067	0.039697	0.007414	0.116756	0.089319	0.087213	0.008709	0.022754	0	0.123302	0.009162	0.033848	0.010019	0.184953	0.056952	0.07355	0	0.078806	0.021362	0.028414	0	0.003281	0	0.039779	0	0.000376	0	0.001134	0.003536	0.035033	0.010639	0.071982	0.014496	0.050566	0.027554	0.045813	0	0.159286	0.062663	0.28015	0	0.038246	0	0.008688	0.010901	0.282985	0.006636	0.062991
HDAC3	ENSG00000171720	0.219079	0.024059	0.021654	0.032904	0.034932	0.018445	0.030179	0.009909	0.094228	0.006015	0.009864	0.013443	0.036036	0.002256	0.022959	0.030008	0.010093	0.022141	0.008039	0.030488	0	0.003281	0.299241	0.00041	0.029591	0.011654	0	0.098062	0.002786	0.046218	0.073013	0.02692	0.021492	0.038606	0.005551	0.025067	0	0.04231	0.140485	0.108265	0.019282	0.025301	0.003252	0.053464	0.028689	0.024206	0.020781	0.011155
HDAC8	ENSG00000147099	0.008755	0.002406	0.043166	0.016452	0.020489	0.021954	0.030472	0.015414	0	0.006015	0.00596	0.005521	0.008489	0.051877	0.124959	0.020594	0.013663	0.000188	0.026232	0.0112	0	0.006562	0.000499	0.004511	0.00857	0.000376	0	0.001134	0.032583	0.006331	0.004368	0.008193	0.041126	0.015736	0.045196	0.038682	0	0.0224	0.180937	0.024369	0	0.001177	0	0.001337	0.018771	0.00198	0	0.016404
HDAC11	ENSG00000163517	0.078957	0.007218	0.461698	0.012206	0.116902	0.027367	0.042591	0.013579	0	0.183449	0.01401	0.034328	0	0.047366	0.049605	0.023536	0.008092	0.016137	0.027604	0.018459	0.071969	0.003281	0.002324	0.181057	0	0.006391	0	0.001134	0.029839	0.010341	0.061474	0.007315	0.029006	0.04511	0.016906	0.033495	0.025649	0.070932	0.153728	0.218576	0.00898	0.015298	0.002019	0.040766	0.008325	0.019144	0.025316	0.055117
HDAC10	ENSG00000100429	0	0.002406	0.010379	0.121267	0.061966	0.063255	0.031417	0.0734	0.009002	0.006015	0.004101	0.036969	0	0.090221	0.030306	0.028831	0.001497	0.103949	0.024019	0.043762	0	0.027886	0.001896	0.00082	0.011388	0.013533	0.001796	0.003968	0.001335	0.047274	0.072452	0.067592	0.022035	0.123372	0.055049	0.085575	0	0.06471	0.016223	0.644567	0.005808	0.099439	0	0.062152	0.005782	0.031907	0.006153	0.09383
HDAC6	ENSG00000094631	0.161876	0.002406	0.036573	0.026005	0.05683	0.009223	0.042167	0.027892	0	0.006015	0.004792	0.00048	0.072059	0.004511	0.038086	0.036481	0.008869	0.001313	0.013885	0.025303	0	0.003281	0.019503	0.00041	0.00857	0.000376	0	0.001134	0.00339	0.000422	0.004338	0.00117	0.095549	0.014267	0.044706	0.022474	0	0.002489	0.471436	0.06827	0.006785	0.001177	0.028345	0.001337	0.019381	0.00044	0.006167	0.001312
HDAC7	ENSG00000061273	0.223221	0.010826	0.088821	0.032904	0.046661	0.049621	0.046585	0.003303	0	0.006015	0.017597	0.00168	0.129097	0.042855	0.055221	0.041776	0.015416	0.058542	0.021301	0.031318	0	0.003281	0.002118	0.002666	0.006733	0.004135	0	0.030042	0.00614	0.045796	0.0153	0.011119	0.055823	0.021611	0.080394	0.01664	0	0.039822	0.177096	0.056365	0	0.038246	0.022588	0.030074	0.001761	0.018044	0.020882	0.017716
HDAC4	ENSG00000068024	0.062077	0.116686	0.002273	0.31365	0.030208	0.108766	0.021469	0.382781	0.04744	0.006015	0.023301	0.027846	0.053291	0.004511	0.051314	0.160044	0.000634	0.030209	0.011521	0.179819	0	0.045931	0.011224	0.082019	0.037801	0.053381	0	0.001134	0.000756	0.138444	0.034222	0.087197	0.058488	0.052664	0.025808	0.191679	0	0.063466	0.193843	0.290939	0.037368	0.039423	0	0.012698	0.007475	0.04511	0.028088	0.037401
HDAC5	ENSG00000108840	0.074357	0.14315	0.041368	0.028393	0.027656	0.100847	0.024623	0.028259	0.080301	0.006015	0.01826	0.005761	0	0.004511	0.117582	0.015887	0.004403	0.021578	0.015507	0.012444	0	0.003281	0	0.00041	0	0.000376	0	0.001134	0	0.007387	0.037782	0.029553	0.071308	0.013009	0.043633	0.052512	0.017869	0.002489	0.019671	0.133192	0.045996	0.007649	0.002399	0.101582	0.007502	0.17186	0.02605	0.031495
HDAC9	ENSG00000048052	0.111272	0.002406	0.247598	0.014064	0.086959	0.038394	0.026163	0.009175	0	0.006015	0.05046	0.002401	0.063119	0.056388	0.16886	0.038834	0.045071	0.004878	0.069117	0.014103	0	0.003281	0.00611	0.004921	0.010016	0.007518	0	0.022673	0.004392	0.00802	0.050044	0.005267	0.112864	0.005455	0.121143	0.014479	0.080266	0.002489	0.16935	0.268244	0.009193	0.001177	0	0.030742	0.027108	0.032347	0.025998	0.001312
SIRT6	ENSG00000077463	0.041568	0.014435	0.022137	0.125778	0.045804	0.107664	0.037675	0.189739	0	0.030074	0.002906	0.04345	0	0.029322	0.05933	0.107677	0.054953	0.006755	0.026734	0.105569	0	0.04429	0	0.010252	0	0.024811	0.035568	0.001134	0.012056	0.016461	0.051026	0.126114	0.009542	0.080779	0.02319	0.120799	0.010623	0.099554	0.031382	0.822033	0	0.061193	0.01432	0.001337	0.005274	0.034108	0.005855	0.098423
SIRT3	ENSG00000142082	0.039548	0.067365	0.006592	0.125778	0.031909	0.138138	0.014806	0.06973	0.032322	0.006015	0.014597	0.030247	0.053319	0.004511	0.024292	0.151806	0.026172	0.066047	0.030514	0.076532	0.005256	0.026246	0.010537	0.00041	0	0.002256	0	0.002267	0.008408	0.113541	0.068439	0.03482	0.025413	0.07952	0.023795	0.161641	0.015423	0.05351	0.056748	0.49761	0.034119	0.056486	0.022146	0.068835	0.004144	0.018484	0.010767	0.030839
SIRT1	ENSG00000096717	0	0.007218	0.012508	0.036088	0.066533	0.03669	0.000853	0.013579	0.249175	0.042103	0.025329	0.033128	0	0.004511	0.05214	0.052956	0.003589	0.020265	0.032473	0.021363	0.02787	0.00164	0	0.003896	0	0.006767	0	0.001134	0.00434	0.001899	0.01777	0.027505	0.03845	0.025388	0.062848	0.033063	0.030727	0.002489	0.112683	0.109381	0.007186	0.001177	0	0.001337	0.016584	0.032127	0.073264	0.027558
SIRT2	ENSG00000068903	0.053298	0.025262	0.323389	0.018044	0.142801	0.033883	0.285229	0.02936	0.120047	0.006015	0.046459	0.006001	0.027721	0.004511	0.103872	0.031773	0.051368	0.040529	0.073892	0.009333	0	0.019685	0.004894	0.001025	0.014583	0.01015	0.005615	0.001134	0.038936	0.043264	0.045889	0.01902	0.204379	0.027486	0.532087	0.033711	0.083336	0.021155	0.764567	0.122589	0.270606	0.001177	0	0.018044	0.017414	0.025086	0.030789	0.007874
SIRT7	ENSG00000187531	0.266349	0.002406	0.217597	0.000531	0.33225	0.047015	0.098978	0.088447	0.14544	0.006015	0.052001	0.003601	0	0.002256	0.120685	0.097085	0.03907	0.016699	0.065977	0.063466	0.018764	0.00164	0.020134	0.00041	0.054367	0.000376	0	0.001134	0.065746	0.010552	0.311633	0.010241	0.173502	0.015107	0.185098	0.068719	0.118629	0.018666	0.405832	0.063248	0.022984	0.086494	0.032685	0.009356	0.026755	0.016724	0.043247	0.023621
SIRT4	ENSG00000089163	0.129979	0.006015	0.093823	0.037946	0.039844	0.078993	0.013136	0.015781	0	0.17142	0.001916	0.006241	0.10406	0.002256	0.111531	0.045307	0.011523	0.003753	0.033832	0.0224	0.058583	0.018044	0.010144	0.005126	0.021454	0.000376	0	0.001134	0.028847	0.011185	0.026437	0.065837	0.03018	0.049307	0.03197	0.053376	0.01359	0.016178	0.136127	0.202764	0	0.055898	0.004879	0.026732	0.03837	0.04291	0.036089	0.013123
SIRT5	ENSG00000124523	0.011035	0.008421	0.406448	0.039803	0.193847	0.031678	0.09244	0.053215	0.059141	0.030074	0.016928	0.031687	0.047019	0.036088	0.125742	0.1724	0.006569	0.016324	0.05389	0.054133	0	0.003281	0.003556	0.003691	0.004154	0.011654	0	0.001134	0.013122	0.02638	0.146111	0.011704	0.079951	0.01112	0.0889	0.071312	0.024979	0.017422	0.509275	0.04725	0	0.071196	0	0.011361	0.014223	0.013203	0.010985	0.033464
[truncated: 18 more columns]
