# Supplementary material for: Genomic characterization of genes encoding histone acetylation modulator proteins identifies therapeutic targets for cancer treatment
Source: Nat Commun. 2019 Feb 13;10:733. doi: 10.1038/s41467-019-08554-x (PMC6374416; doi:10.1038/s41467-019-08554-x)
Supplement: Supplementary file 9 — Supplementary Data 7 [file 41467_2019_8554_MOESM9_ESM.xlsx]

## Sheet: Supplementary Table 7
Supplementary Data 7. Summary of the co-altered genes located in the identified recurrent focal SCNAs in each cancer type
Cancer type	Region of focal SCNA peak	SCNA type	HAMP gene	Co-altered genes
ACC	chr19:14469396-16898294	Amplification	BRD4	AKAP8L, WIZ, TMEM38A, AP1M1, NOTCH3, CHERP, OR1I1, NDUFB7, TECR, FAM32A, C19orf44, MED26, RASAL3, AKAP8, EPHX3, ILVBL, SYDE1, CASP14, SLC1A6, DDX39A, PKN1, CD97, GIPC1, EMR2, OR7A10, SLC35E1, EPS15L1, KLF2, OR7C2, OR7C1, EMR3, DNAJB1, BRD4, CIB3, CTD-3222D19.2, PTGER1, ZNF333, CCDC105, PGLYRP2, TPM4, RAB8A, CYP4F11, OR10H3, OR10H2, CYP4F22, OR10H5, OR10H4, OR7A17, CYP4F2, CYP4F12, CYP4F8, CYP4F3,…
ACC	chr5:1-1300024	Amplification	BRD9	BRD9, AHRR, SLC9A3, TRIP13, SDHA, CEP72, SLC12A7, NKD2, PLEKHG4B, TERT, SLC6A18, CCDC127, TPPP, SLC6A19, EXOC3, LRRC14B, ZDHHC11, ZDHHC11B, PDCD6
ACC	chr19:42800621-59128983	Amplification	TRIM28	MARK4, TRAPPC6A, PGLYRP1, GIPR, FUZ, PLAUR, QPCTL, PPP5C, ERCC1, ZNF582, NLRP2, EHD2, PNKP, AP2S1, ZNF112, POLD1, SLC6A16, GLTSCR1, SPHK2, RPL18, CA11, ISOC2, U2AF2, EPN1, BCL3, PVR, XRCC1, TEAD2, CEACAM1, LIPE, PAFAH1B3, PTPRH, SLC27A5, ZNF324, ZNF671, ZNF416, ZNF586, ZNF446, ZNF264, RPS5, MYBPC2, PPP1R15A, HSD17B14, FTL, BAX, SULT2B1, CNOT3, GP6, STRN4, FLT3LG, NAT14, IL11, MZF1, KCNN4, TULP2, …
BLCA	chr17:57049659-81195210	Amplification	BPTF	CD79B, SCN4A, CYB561, MRC2, TIMP2, USP36, VMP1, APPBP2, HEATR6, PRR11, SDK2, JMJD6, ST6GALNAC1, WIPI1, ST6GALNAC2, LLGL2, CACNG5, CACNG4, TNRC6C, PGS1, PSMC5, METTL2A, BIRC5, APOH, UNC13D, MFSD11, RGS9, TRIM37, DHX40, TUBD1, RPS6KB1, RECQL5, GALK1, INTS2, MED13, CCDC47, FTSJ3, SMARCD2, ICAM2, SYNGR2, DDX5, CYTH1, LGALS3BP, SMURF2, CACNG1, SLC16A6, PRKAR1A, FAM20A, MAP2K6, SLC9A3R1, NAT9, TMEM104,…
BLCA	chr5:1-1962255	Amplification	BRD9	BRD9, CLPTM1L, AHRR, SLC9A3, TRIP13, SDHA, CEP72, IRX4, SLC12A7, SLC6A3, NDUFS6, NKD2, LPCAT1, PLEKHG4B, TERT, SLC6A18, CCDC127, TPPP, MRPL36, SLC6A19, EXOC3, LRRC14B, ZDHHC11, ZDHHC11B, PDCD6
BLCA	chr8:41509238-42133127	Amplification	KAT6A	ANK1, AP3M2, KAT6A, PLAT ,
BLCA	chr17:57049659-81195210	Amplification	SIRT7	CD79B, SCN4A, CYB561, MRC2, TIMP2, USP36, VMP1, APPBP2, HEATR6, PRR11, SDK2, JMJD6, ST6GALNAC1, WIPI1, ST6GALNAC2, LLGL2, CACNG5, CACNG4, TNRC6C, PGS1, PSMC5, METTL2A, BIRC5, APOH, UNC13D, MFSD11, RGS9, TRIM37, DHX40, TUBD1, RPS6KB1, RECQL5, GALK1, INTS2, MED13, CCDC47, FTSJ3, SMARCD2, ICAM2, SYNGR2, DDX5, CYTH1, LGALS3BP, SMURF2, CACNG1, SLC16A6, PRKAR1A, FAM20A, MAP2K6, SLC9A3R1, NAT9, TMEM104,…
BLCA	chr9:962233-9517331	Amplification	SMARCA2	DMRT3, RFX3, SMARCA2, KIAA0020, JAK2, ERMP1, SPATA6L, SLC1A1, CDC37L1, RLN2, RLN1, PLGRKT, RIC1, KDM4C, GLIS3, RCL1, INSL6, INSL4, MLANA, CD274, IL33, TMEM261, RANBP6, VLDLR, AK3, UHRF2, PTPRD, KCNV2, TPD52L3, DMRT2, GLDC, KIAA2026, PDCD1LG2, PPAPDC2, KDM4C, AL365202.1, AL158147.2
BRCA	chr19:15293986-15408613	Amplification	BRD4	EPHX3, BRD4 ,
BRCA	chr5:1-4472523	Amplification	BRD9	BRD9, CLPTM1L, AHRR, SLC9A3, TRIP13, SDHA, CEP72, IRX4, SLC12A7, SLC6A3, NDUFS6, NKD2, LPCAT1, PLEKHG4B, TERT, SLC6A18, CCDC127, IRX1, IRX2, TPPP, MRPL36, SLC6A19, EXOC3, LRRC14B, C5orf38, ZDHHC11, ZDHHC11B, PDCD6 ,
BRCA	chr6:13030994-13889516	Amplification	SIRT5	RANBP9, MCUR1, SIRT5, TBC1D7, GFOD1, NOL7 ,
CESC	chr6:30477277-30635592	Amplification	ATAT1	ATAT1, DHX16, C6orf136, MRPS18B, PPP1R10, ABCF1, PRR3, GNL1 ,
CESC	chr5:1-3307354	Amplification	BRD9	BRD9, CLPTM1L, AHRR, SLC9A3, TRIP13, SDHA, CEP72, IRX4, SLC12A7, SLC6A3, NDUFS6, NKD2, LPCAT1, PLEKHG4B, TERT, SLC6A18, CCDC127, IRX2, TPPP, MRPL36, SLC6A19, EXOC3, LRRC14B, C5orf38, ZDHHC11, ZDHHC11B, PDCD6
CESC	chr4:55983268-56580180	Amplification	CLOCK	NMU, SRD5A3, TMEM165, CLOCK, PDCL2
CHOL	chr1:120527362-158514225	Amplification	ASH1L	MTMR11, PLEKHO1, INSRR, SH2D2A, CD5L, BCL9, SCAMP3, ASH1L, GON4L, ARHGEF2, LAMTOR2, MEF2D, ETV3, GPR89A, CD160, PRPF3, APH1A, C1orf54, CA14, GJA8, POLR3GL, MSTO1, C1orf61, CHD1L, PEX11B, FMO5, PIAS3, PRKAB2, DAP3, RHBG, KIAA0907, NES, BCAN, ARHGEF11, RAB25, HAPLN2, FCRL2, SYT11, NOTCH2, VPS45, ITGA10, PRCC, FCRL5, RRNAD1, MRPL24, ISG20L2, CRABP2, HDGF, PRUNE, RORC, TUFT1, SF3B4, ECM1, ZNF687, TAR…
COAD	chr17:63368617-66603035	Amplification	BPTF	WIPI1, CACNG5, CACNG4, APOH, CACNG1, SLC16A6, PRKAR1A, FAM20A, NOL11, ARSG, PITPNC1, PRKCA, CEP112, AXIN2, BPTF, KPNA2, C17orf58, AMZ2, PSMD12, HELZ, CTD-2535L24.2
COAD	chr8:41509238-42365372	Amplification	KAT6A	ANK1, POLB, AP3M2, VDAC3, KAT6A, IKBKB, PLAT, DKK4, SLC20A2
ESCA	chr1:120523956-171983088	Amplification	ASH1L	SCYL3, C1orf112, SELE, FMO3, METTL13, FMO1, MTMR11, ATP1A2, PLEKHO1, SLAMF7, INSRR, SH2D2A, MYOC, CD84, FCGR2B, CD5L, KIFAP3, FMO4, DUSP12, IGSF9, FMO2, BCL9, PRRX1, SCAMP3, ASH1L, GON4L, ARHGEF2, LAMTOR2, MEF2D, ETV3, SLAMF1, CD48, UAP1, RGS4, GPR89A, CD160, PRPF3, APH1A, BLZF1, CCDC181, SLC19A2, MROH9, FMO6P, PRRC2C, VAMP4, ATF6, C1orf54, CA14, GORAB, GJA8, POLR3GL, COPA, CD244, LY9, MSTO1, C1o…
ESCA	chr19:15012235-16227795	Amplification	BRD4	AKAP8L, WIZ, NOTCH3, OR1I1, RASAL3, AKAP8, EPHX3, ILVBL, SYDE1, CASP14, SLC1A6, OR7C2, BRD4, CCDC105, PGLYRP2, TPM4, CYP4F11, OR10H3, OR10H2, CYP4F22, OR10H5, OR10H4, CYP4F2, CYP4F12, CYP4F8, CYP4F3, OR10H1
ESCA	chr11:1-135006516	Amplification	KAT5	BAD, ZNF195, ABCC8, TMEM132A, ALDH3B1, USH1C, PAX6, SYT7, PIK3C2A, CD6, POLA2, CAPN1, VSIG2, PHLDB1, PRDM11, SYT13, MRE11A, PLEKHB1, OSBPL5, GRAMD1B, RNH1, BIRC3, NR1H3, NUP160, GAB2, USP2, MED17, BARX2, USP28, RSF1, RCN1, DKK3, FAM160A2, TTC17, ALX4, KCNQ1, CHRDL2, FAM168A, RELT, QSER1, DGAT2, SPA17, TSPAN32, CDON, SPI1, MPPED2, RASGRP2, PPP2R5B, PYGM, GAL, DRD4, SCT, PHRF1, NUCB2, TRPM5, MS4A12…
ESCA	chr8:41578578-42518767	Amplification	KAT6A	ANK1, POLB, AP3M2, VDAC3, KAT6A, IKBKB, PLAT, DKK4, SLC20A2, SMIM19 ,
HNSC	chr5:1-1415403	Amplification	BRD9	BRD9, CLPTM1L, AHRR, SLC9A3, TRIP13, SDHA, CEP72, SLC12A7, NKD2, PLEKHG4B, TERT, SLC6A18, CCDC127, TPPP, SLC6A19, EXOC3, LRRC14B, ZDHHC11, ZDHHC11B, PDCD6 ,
HNSC	chr9:4718965-6000194	Amplification	KIAA2026	JAK2, ERMP1, RLN2, RLN1, PLGRKT, RIC1, RCL1, INSL6, INSL4, MLANA, CD274, AK3, KIAA2026, PDCD1LG2, AL158147.2
KIRC	chr5:110205915-180915260	Amplification	BRD8	CDKL3, SLC6A7, RNF14, MATR3, CD74, GABRA1, B4GALT7, FAM13B, RPL26L1, FLT4, MFAP3, MAT2B, SOX30, SPDL1, JADE2, LCP2, CTNNA1, YTHDC2, TSPAN17, NOP16, MAPK9, COL23A1, THOC3, FSTL4, FAM114A2, CYFIP2, PRDM6, WNT8A, SLC12A2, SNX24, SNCAIP, ISOC1, PITX1, TRPC7, NDST1, CAMK2A, TCOF1, AFF4, HMMR, P4HA2, STK10, FBXW11, CDHR2, SNCB, PKD2L2, KCNN2, TCF7, KIAA0141, PCDHB4, PCDHA6, PCDHGA2, MRPL22, GEMIN5, FAT…
KIRC	chr5:110205915-180915260	Amplification	HDAC3	CDKL3, SLC6A7, RNF14, MATR3, CD74, GABRA1, B4GALT7, FAM13B, RPL26L1, FLT4, MFAP3, MAT2B, SOX30, SPDL1, JADE2, LCP2, CTNNA1, YTHDC2, TSPAN17, NOP16, MAPK9, COL23A1, THOC3, FSTL4, FAM114A2, CYFIP2, PRDM6, WNT8A, SLC12A2, SNX24, SNCAIP, ISOC1, PITX1, TRPC7, NDST1, CAMK2A, TCOF1, AFF4, HMMR, P4HA2, STK10, FBXW11, CDHR2, SNCB, PKD2L2, KCNN2, TCF7, KIAA0141, PCDHB4, PCDHA6, PCDHGA2, MRPL22, GEMIN5, FAT…
LAML	chr21:37355765-48129895	Amplification	BRWD1	PRDM15, PFKL, COL6A1, COL6A2, SIK1, DNMT3L, TRPM2, DOPEY2, DSCR3, DYRK1A, KCNJ6, KCNJ15, ERG, ETS2, LCA5L, MX1, C2CD2, CBR1, CBR3, MORC3, CHAF1B, CLDN14, SIM2, HLCS, ABCG1, TFF3, TFF2, TFF1, TMPRSS3, UBASH3A, RSPH1, SLC37A1, PDE9A, WDR4, NDUFV3, PKNOX1, CBS, U2AF1, CRYAA, HSF2BP, RRP1B, PDXK, CSTB, RRP1, AGPAT3, TRAPPC10, C21orf33, ICOSLG, AIRE, C21orf2, LRRC3, ITGB2, FAM207A, FTCD, SPATC1L, LSS,…
LGG	chr8:111789750-139301377	Amplification	ATAD2	ST3GAL1, TG, TAF2, ZFAT, WISP1, NDRG1, TRPS1, ANXA13, SQLE, PHF20L1, LRRC6, KHDRBS3, EFR3A, HHLA1, ENPP2, DSCC1, DERL1, MYC, NOV, MAL2, EIF3H, UTP23, NDUFB9, TATDN1, FAM83A, GSDMC, FAM49B, ASAP1, DEPTOR, ADCY8, SLA, TBC1D31, WDYHV1, ATAD2, FBXO32, NSMCE2, RAD21, SLC30A8, MED30, TNFRSF11B, CSMD3, KIAA0196, TMEM65, TMEM71, ZHX1, FAM84B, MTSS1, RNF139, HAS2, SNTB1, MTBP, MRPL13, TRIB1, KLHL38, FAM91…
LGG	chr7:100068903-159138663	Amplification	TRIM24	CFTR, AOC1, WNT16, TMEM176A, ARF5, ST7, POLR2J, PRKAR2B, KMT2E, KDM7A, AGK, IFRD1, SYPL1, AASS, UBE3C, NUB1, ABCF2, CHPF2, ZNF800, ARHGEF5, KCNH2, CUL1, KMT2C, TBXAS1, PARP12, HIPK2, TNPO3, ING3, BCAP29, CTTNBP2, ACTL6B, LRCH4, CNOT4, SLC13A1, CADPS2, SMARCD3, AKR1B1, TRIP6, ACHE, SRRT, MRPS33, NDUFB2, PUS7, LAMB4, NRCAM, LAMB1, SLC26A4, SLC26A3, DLD, CPA1, ZC3HC1, RASA4, PMPCB, DNAJC2, NAMPT, PI…
LIHC	chr8:113709691-137885493	Amplification	ATAD2	ST3GAL1, TG, TAF2, ZFAT, WISP1, NDRG1, TRPS1, ANXA13, SQLE, PHF20L1, LRRC6, KHDRBS3, EFR3A, HHLA1, ENPP2, DSCC1, DERL1, MYC, NOV, MAL2, EIF3H, UTP23, NDUFB9, TATDN1, FAM83A, GSDMC, FAM49B, ASAP1, DEPTOR, ADCY8, SLA, TBC1D31, WDYHV1, ATAD2, FBXO32, NSMCE2, RAD21, SLC30A8, MED30, TNFRSF11B, CSMD3, KIAA0196, TMEM65, TMEM71, ZHX1, FAM84B, MTSS1, RNF139, HAS2, SNTB1, MTBP, MRPL13, TRIB1, KLHL38, FAM91…
LIHC	chr19:15361827-15600481	Amplification	BRD4	AKAP8L, WIZ, RASAL3, AKAP8, BRD4, PGLYRP2 ,
LUAD	chr4:54190248-59188078	Amplification	CLOCK	POLR2B, LNX1, NOA1, REST, EXOC1, CHIC2, NMU, KIAA1211, SRD5A3, SPINK2, PAICS, KDR, PPAT, TMEM165, CLOCK, PDGFRA, FIP1L1, KIT, AASDH, PDCL2, IGFBP7, HOPX, SRP72, CEP135, GSX2, ARL9, THEGL
LUAD	chr7:1-26479368	Amplification	HDAC9	MAD1L1, ICA1, ABCB5, THSD7A, ETV1, SCIN, CYTH3, RNF216, HDAC9, NFE2L3, OSBPL3, SNX13, CYP2W1, FSCN1, ACTB, EIF2AK1, SNX10, TWISTNB, ITGB8, SP4, DNAH11, STEAP1B, MPP6, DFNA5, NPVF, ADAP1, LFNG, BRAT1, IQCE, EIF3B, SNX8, NUDT1, AIMP2, USP42, C1GALT1, RPA3, GLCCI1, PHF14, TMEM106B, MEOX2, ANKMY2, TSPAN13, AGR2, AHR, PMS2, OCM, KLHL7, CBX3, HNRNPA2B1, NXPH1, NPY, FAM126A, ARL4A, CCZ1, FTSJ2, TWIST1, …
LUAD	chr8:41418164-42345619	Amplification	KAT6A	ANK1, POLB, AP3M2, VDAC3, KAT6A, IKBKB, PLAT, DKK4, AGPAT6, NKX6-3, SLC20A2
LUAD	chr16:29426413-31297449	Amplification	KAT8	ITGAL, MVP, PRSS8, KIF22, SRCAP, FUS, YPEL3, FBXL19, STX1B, HSD3B7, SETD1A, BCL7C, ZNF629, CORO1A, MAPK3, GDPD3, QPRT, PYCARD, MAZ, STX4, CDIPT, BCKDK, KAT8, RNF40, SLX1A, TBX6, PPP4C, ALDOA, FAM57B, DOC2A, HIRIP3, TAOK2, TMEM219, CTF1, PRSS53, ZNF689, PRR14, FBRS, PHKG2, C16orf92, PRRT2, ZNF668, ZNF646, VKORC1, RP11-231C14.4, CD2BP2, TBC1D10B, INO80E, BOLA2B, PYDC1, ZNF764, ZNF747, ZNF768, SEZ6L…
LUSC	chr17:64990496-79181624	Amplification	BPTF	TIMP2, USP36, SDK2, JMJD6, ST6GALNAC1, WIPI1, ST6GALNAC2, LLGL2, CACNG4, TNRC6C, PGS1, BIRC5, UNC13D, MFSD11, RECQL5, GALK1, SYNGR2, CYTH1, LGALS3BP, CACNG1, SLC16A6, PRKAR1A, FAM20A, MAP2K6, SLC9A3R1, NAT9, TMEM104, CDR2L, KCNJ2, SOX9, MRPS7, GGA3, ARMC7, NUP85, SLC25A19, MIF4GD, NT5C, QRICH2, FOXJ1, SEC14L1, RHBDF2, AANAT, NOL11, ITGB4, WBP2, H3F3B, UNK, TRIM47, FAM104A, SLC39A11, C17orf80, ARS…
LUSC	chr5:1-1376362	Amplification	BRD9	BRD9, CLPTM1L, AHRR, SLC9A3, TRIP13, SDHA, CEP72, SLC12A7, NKD2, PLEKHG4B, TERT, SLC6A18, CCDC127, TPPP, SLC6A19, EXOC3, LRRC14B, ZDHHC11, ZDHHC11B, PDCD6 ,
LUSC	chr4:56264441-56507740	Amplification	CLOCK	NMU, TMEM165, CLOCK, PDCL2 ,
OV	chr19:15333311-15422141	Amplification	BRD4	EPHX3, BRD4 ,
OV	chr5:1-1428010	Amplification	BRD9	BRD9, CLPTM1L, AHRR, SLC9A3, TRIP13, SDHA, CEP72, SLC12A7, SLC6A3, NKD2, PLEKHG4B, TERT, SLC6A18, CCDC127, TPPP, SLC6A19, EXOC3, LRRC14B, ZDHHC11, ZDHHC11B, PDCD6
OV	chr8:41533339-42008185	Amplification	KAT6A	ANK1, KAT6A ,
READ	chr1:120523956-163100192	Amplification	ASH1L	MTMR11, ATP1A2, PLEKHO1, SLAMF7, INSRR, SH2D2A, CD84, FCGR2B, CD5L, DUSP12, IGSF9, BCL9, SCAMP3, ASH1L, GON4L, ARHGEF2, LAMTOR2, MEF2D, ETV3, SLAMF1, CD48, UAP1, RGS4, GPR89A, CD160, PRPF3, APH1A, ATF6, C1orf54, CA14, GJA8, POLR3GL, COPA, CD244, LY9, MSTO1, C1orf61, CHD1L, PEX11B, FMO5, PIAS3, PRKAB2, FCRLA, HSD17B7, DAP3, RHBG, KIAA0907, ATP1A4, NES, BCAN, CRP, ARHGEF11, RAB25, HAPLN2, APCS, FCR…
READ	chr20:42087863-63025520	Amplification	NCOA3	DPM1, CYP24A1, ZFP64, RTFDC1, TOMM34, RTEL1-TNFRSF6B, KCNG1, FAM65C, ATP9A, SPO11, CBLN4, OGFR, ELMO2, WISP2, CTSA, EYA2, BCAS1, KCNQ2, SLC35C2, GNAS, PHACTR3, TFAP2C, AURKA, CASS4, COL9A3, PLTP, PCIF1, MMP9, CD40, ZMYND8, SGK2, IFT52, MYBL2, R3HDML, HNF4A, NFATC2, RIMS4, PABPC1L, STK4, SALL4, ADNP, PFDN4, DOK5, CSTF1, BMP7, RAE1, TPD52L2, DNAJC5, NELFCD, CTSZ, PRPF6, TUBB1, SLMO2, HRH3, MTG2, PS…
READ	chr20:42087863-63025520	Amplification	ZMYND8	DPM1, CYP24A1, ZFP64, RTFDC1, TOMM34, RTEL1-TNFRSF6B, KCNG1, FAM65C, ATP9A, SPO11, CBLN4, OGFR, ELMO2, WISP2, CTSA, EYA2, BCAS1, KCNQ2, SLC35C2, GNAS, PHACTR3, TFAP2C, AURKA, CASS4, COL9A3, PLTP, PCIF1, MMP9, CD40, ZMYND8, SGK2, IFT52, MYBL2, R3HDML, HNF4A, NFATC2, RIMS4, PABPC1L, STK4, SALL4, ADNP, PFDN4, DOK5, CSTF1, BMP7, RAE1, TPD52L2, DNAJC5, NELFCD, CTSZ, PRPF6, TUBB1, SLMO2, HRH3, MTG2, PS…
SARC	chr8:54604081-146364022	Amplification	ATAD2	ST3GAL1, RPS20, ZC3H3, SLC45A4, RNF19A, NSMAF, STAU2, TG, PREX2, ATP6V1H, RRM2B, TAF2, ARFGEF1, ZFAT, MTFR1, TRAM1, PABPC1, CPSF1, TPD52, PAG1, RUNX1T1, CDH17, GRHL2, CPNE3, ZFHX4, SGK3, CSPP1, ZFAND1, RP1, CA2, RIPK2, EYA1, NBN, TRPA1, CPQ, DECR1, CALB1, IMPAD1, LAPTM4B, UBE2W, POP1, NIPAL2, JPH1, STK3, GDAP1, RAB2A, EIF3E, EMC2, ESRP1, WISP1, NDRG1, ZC2HC1A, IL7, STMN2, ARMC1, TRPS1, SPAG1, CHR…
SARC	chr17:57648506-81195210	Amplification	BPTF	CD79B, SCN4A, CYB561, MRC2, TIMP2, USP36, VMP1, APPBP2, HEATR6, SDK2, JMJD6, ST6GALNAC1, WIPI1, ST6GALNAC2, LLGL2, CACNG5, CACNG4, TNRC6C, PGS1, PSMC5, METTL2A, BIRC5, APOH, UNC13D, MFSD11, RGS9, DHX40, TUBD1, RPS6KB1, RECQL5, GALK1, INTS2, MED13, CCDC47, FTSJ3, SMARCD2, ICAM2, SYNGR2, DDX5, CYTH1, LGALS3BP, SMURF2, CACNG1, SLC16A6, PRKAR1A, FAM20A, MAP2K6, SLC9A3R1, NAT9, TMEM104, CDR2L, GNA13, …
SARC	chr4:48068784-57596140	Amplification	CLOCK	LNX1, TXK, FRYL, EXOC1, SLAIN2, OCIAD1, CWH43, DCUN1D4, USP46, CHIC2, NMU, KIAA1211, SRD5A3, RASL11B, PAICS, KDR, PPAT, TMEM165, CLOCK, PDGFRA, TEC, FIP1L1, OCIAD2, SLC10A4, KIT, AASDH, SGCB, SPATA18, PDCL2, HOPX, SRP72, CEP135, GSX2, ZAR1, SCFD2, LRRC66, ARL9, ERVMER34-1, THEGL
SKCM	chr1:120523956-158279504	Amplification	ASH1L	MTMR11, PLEKHO1, INSRR, SH2D2A, CD5L, BCL9, SCAMP3, ASH1L, GON4L, ARHGEF2, LAMTOR2, MEF2D, ETV3, GPR89A, CD160, PRPF3, APH1A, C1orf54, CA14, GJA8, POLR3GL, MSTO1, C1orf61, CHD1L, PEX11B, FMO5, PIAS3, PRKAB2, DAP3, RHBG, KIAA0907, NES, BCAN, ARHGEF11, RAB25, HAPLN2, FCRL2, SYT11, NOTCH2, VPS45, ITGA10, PRCC, FCRL5, RRNAD1, MRPL24, ISG20L2, CRABP2, HDGF, PRUNE, RORC, TUFT1, SF3B4, ECM1, ZNF687, TAR…
SKCM	chr8:121948409-146364022	Amplification	ATAD2	ST3GAL1, ZC3H3, SLC45A4, TG, ZFAT, CPSF1, WISP1, NDRG1, CHRAC1, GML, GSDMD, TSTA3, PYCRL, EEF1D, ANXA13, SQLE, DENND3, AGO2, SLURP1, PHF20L1, LRRC6, THEM6, KHDRBS3, EFR3A, HHLA1, DERL1, MYC, NDUFB9, TATDN1, FAM83A, GSDMC, FAM135B, ZNF7, ARHGAP39, SLC39A4, NAPRT, FAM49B, ASAP1, ADCY8, SLA, TBC1D31, WDYHV1, ATAD2, FBXO32, NSMCE2, RHPN1, CYP11B1, LY6K, LY6E, VPS28, TONSL, RECQL4, LRRC14, PPP1R16A, F…
SKCM	chr17:57591509-81195210	Amplification	BPTF	CD79B, SCN4A, CYB561, MRC2, TIMP2, USP36, VMP1, APPBP2, HEATR6, SDK2, JMJD6, ST6GALNAC1, WIPI1, ST6GALNAC2, LLGL2, CACNG5, CACNG4, TNRC6C, PGS1, PSMC5, METTL2A, BIRC5, APOH, UNC13D, MFSD11, RGS9, DHX40, TUBD1, RPS6KB1, RECQL5, GALK1, INTS2, MED13, CCDC47, FTSJ3, SMARCD2, ICAM2, SYNGR2, DDX5, CYTH1, LGALS3BP, SMURF2, CACNG1, SLC16A6, PRKAR1A, FAM20A, MAP2K6, SLC9A3R1, NAT9, TMEM104, CDR2L, GNA13, …
SKCM	chr22:41468899-41845216	Amplification	EP300	EP300, L3MBTL2, CHADL, RANGAP1, ZC3H7B, TEF, TOB2
SKCM	chr6:1977444-14532705	Amplification	SIRT5	RANBP9, SERPINB1, MCUR1, EDN1, HIVEP1, DSP, MAK, TMEM14C, PAK1IP1, GCNT2, NEDD9, ADTRP, PHACTR1, CD83, PRPF4B, LY86, F13A1, SIRT5, WRNIP1, SERPINB6, NQO2, RREB1, SSR1, RIOK1, NRN1, SLC35B3, RPP40, EEF1E1, GCM2, TFAP2A, TMEM14B, SLC22A23, TUBB2A, BPHL, RIPK1, TUBB2B, C6orf52, FAM50B, MYLK4, FAM217A, TBC1D7, FARS2, GFOD1, CDYL, SYCP2L, BMP6, CAGE1, C6orf195, SNRNP48, PXDC1, SERPINB9, RNF182, PSMG4,…
SKCM	chr17:57591509-81195210	Amplification	SIRT7	CD79B, SCN4A, CYB561, MRC2, TIMP2, USP36, VMP1, APPBP2, HEATR6, SDK2, JMJD6, ST6GALNAC1, WIPI1, ST6GALNAC2, LLGL2, CACNG5, CACNG4, TNRC6C, PGS1, PSMC5, METTL2A, BIRC5, APOH, UNC13D, MFSD11, RGS9, DHX40, TUBD1, RPS6KB1, RECQL5, GALK1, INTS2, MED13, CCDC47, FTSJ3, SMARCD2, ICAM2, SYNGR2, DDX5, CYTH1, LGALS3BP, SMURF2, CACNG1, SLC16A6, PRKAR1A, FAM20A, MAP2K6, SLC9A3R1, NAT9, TMEM104, CDR2L, GNA13, …
SKCM	chr7:136467935-143628771	Amplification	TRIM24	KDM7A, AGK, TBXAS1, PARP12, HIPK2, MRPS33, NDUFB2, PTN, ATP6V0A4, ZC3HAV1, TTC26, SSBP1, EPHB6, CASP2, KIAA1549, TRIM24, AKR1D1, TAS2R3, TAS2R4, TAS2R5, TRPV5, ADCK2, MKRN1, ZC3HAV1L, EPHA1, RAB19, C7orf55-LUC7L2, DENND2A, DGKI, SVOPL, UBN2, BRAF, SLC37A3, PIP, FAM131B, ZYX, C7orf55, PRSS37, TRPV6, C7orf34, TMEM139, OR9A2, CHRM2, CREB3L2, TAS2R60, CLCN1, KLRG2, GSTK1, KEL, TCAF1, PRSS1, WEE2, TME…
STAD	chr5:1-1891820	Amplification	BRD9	BRD9, CLPTM1L, AHRR, SLC9A3, TRIP13, SDHA, CEP72, IRX4, SLC12A7, SLC6A3, NDUFS6, NKD2, LPCAT1, PLEKHG4B, TERT, SLC6A18, CCDC127, TPPP, MRPL36, SLC6A19, EXOC3, LRRC14B, ZDHHC11, ZDHHC11B, PDCD6
TGCT	chr2:1-51779748	Amplification	ATAD2B	NDUFAF7, HEATR5B, MAP4K3, EHD3, TTC27, SPAST, TSSC1, SH3YL1, LTBP1, EIF2AK2, PUM2, MTA3, LAPTM4A, TTC7A, STON1-GTF2A1L, SRBD1, TRIB2, FOSL2, DDX1, APOB, NCOA1, AGBL5, EFR3B, KIF3C, RAB10, GCKR, HADHA, MAPRE3, CAD, NLRC4, MSH2, SF3B6, TP53I3, DNAJC27, POMC, OTOF, CENPA, SLC30A3, MPV17, GTF3C2, EIF2B4, NRBP1, FNDC4, SNX17, PPM1G, CLIP4, TPO, ID2, TAF1B, HPCAL1, ODC1, BIRC6, NOL10, STRN, CEBPZ, PRKD…
TGCT	chr7:63133127-111706330	Amplification	BAZ1B	ANKIB1, CYP51A1, KRIT1, CCDC132, PDK4, SLC25A13, CALCR, POLR2J, PRKAR2B, PON1, CROT, ABCB4, KMT2E, RHBDD2, ASB4, TAC1, DLX6, BAIAP2L1, PHTF2, CCL26, DBF4, GTF2IRD1, ADAM22, SYPL1, MLXIPL, BAZ1B, HGF, CYP3A43, ELN, RFC2, CDK14, STAG3, ASNS, WBSCR22, SRI, SEMA3A, SEMA3C, SLC25A40, BCAP29, ACTL6B, LRCH4, FKBP6, ZCWPW1, PILRA, ABCB1, LAT2, TRIP6, ACHE, SRRT, DTX2, PUS7, LAMB4, NRCAM, LAMB1, SLC26A4, …
TGCT	chr4:54257035-57515684	Amplification	CLOCK	LNX1, EXOC1, CHIC2, NMU, KIAA1211, SRD5A3, PAICS, KDR, PPAT, TMEM165, CLOCK, PDGFRA, FIP1L1, KIT, AASDH, PDCL2, SRP72, CEP135, GSX2, ARL9, THEGL
UCEC	chr19:15310193-16263649	Amplification	BRD4	AKAP8L, WIZ, RASAL3, AKAP8, EPHX3, BRD4, PGLYRP2, TPM4, RAB8A, CYP4F11, OR10H3, OR10H2, CYP4F22, OR10H5, OR10H4, CYP4F2, CYP4F12, CYP4F8, CYP4F3, OR10H1, HSH2D
UCEC	chr5:1-1425066	Amplification	BRD9	BRD9, CLPTM1L, AHRR, SLC9A3, TRIP13, SDHA, CEP72, SLC12A7, SLC6A3, NKD2, PLEKHG4B, TERT, SLC6A18, CCDC127, TPPP, SLC6A19, EXOC3, LRRC14B, ZDHHC11, ZDHHC11B, PDCD6
UCEC	chr12:48199740-48265041	Amplification	HDAC7	HDAC7
UCEC	chr8:41701319-42001905	Amplification	KAT6A	KAT6A
UCEC	chr20:45907205-46076780	Amplification	ZMYND8	ZMYND8
UCS	chr10:76500842-77347172	Amplification	KAT6B	DUSP13, KAT6B, SAMD8, VDAC2, COMTD1, ZNF503, DUPD1
UVM	chr8:42932479-146364022	Amplification	ATAD2	ST3GAL1, RPS20, ZC3H3, SNAI2, SLC45A4, RB1CC1, EFCAB1, RNF19A, NSMAF, STAU2, TG, PREX2, ATP6V1H, RRM2B, TAF2, ARFGEF1, ZFAT, MTFR1, TRAM1, PABPC1, CPSF1, TPD52, PAG1, RUNX1T1, CDH17, OPRK1, GRHL2, CPNE3, ZFHX4, SGK3, CSPP1, ZFAND1, RP1, CA2, RIPK2, EYA1, NBN, TRPA1, CPQ, DECR1, CALB1, IMPAD1, LAPTM4B, UBE2W, POP1, NIPAL2, JPH1, STK3, GDAP1, RAB2A, EIF3E, EMC2, ESRP1, WISP1, NDRG1, ZC2HC1A, IL7, S…
UVM	chr6:1-18226822	Amplification	SIRT5	MYLIP, JARID2, RANBP9, SERPINB1, DTNBP1, MCUR1, FOXC1, EDN1, HIVEP1, DSP, MAK, TMEM14C, PAK1IP1, GCNT2, NEDD9, ADTRP, PHACTR1, CD83, RBM24, CAP2, DUSP22, EXOC2, GMDS, PRPF4B, LY86, F13A1, SIRT5, WRNIP1, SERPINB6, NQO2, RREB1, SSR1, RIOK1, NRN1, SLC35B3, RPP40, ATXN1, NUP153, EEF1E1, GCM2, KIF13A, GMPR, TFAP2A, TMEM14B, IRF4, SLC22A23, TUBB2A, FOXF2, BPHL, RIPK1, TUBB2B, TPMT, FAM8A1, C6orf52, FAM…
ACC	chr17:36912529-43026444	Deletion	HDAC5	LASP1, SLC4A1, MEOX1, ITGA2B, KRT33A, MED24, BRCA1, SLC25A39, GRN, ATP6V0A1, TUBG2, CACNB1, DHX8, IFI35, COASY, PLEKHH3, SMARCE1, GSDMB, ADAM11, ATXN7L3, KCNH4, TMEM101, KRT31, CDC6, KRT23, RPL19, FBXL20, RUNDC3A, UBTF, CSF3, PSMD3, CASC3, RAPGEFL1, KRT37, KRT32, DHX58, KAT2A, RAB5C, NAGLU, HSD17B1, MLX, CNTNAP1, EZH1, PTGES3L-AARSD1, VAT1, RND2, HDAC5, PPY, MPP2, DUSP3, EFTUD2, C17orf53, MED1, R…
BLCA	chr22:47571204-51304566	Deletion	BRD1	MAPK8IP2, TYMP, NCAPH2, MOV10L1, PANX2, SELO, RABL2B, PPP6R2, SBF1, MIOX, LMF2, CHKB, ARSA, ACR, BRD1, ZBED4, MLC1, HDAC10, TUBGCP6, ADM2, KLHDC7B, SCO2, TTLL8, TRABD, ODF3B, ALG12, CRELD2, MAPK11, MAPK12, IL17REL, PLXNB2, PIM3, CPT1B, DENND6B, SYCE3, FAM19A5, CHKB-CPT1B, AL022328.1 ,
BLCA	chr16:3764793-3987522	Deletion	CREBBP	CREBBP
BLCA	chr8:11646513-32609420	Deletion	ELP3	MTMR7, SLC7A2, RHOBTB2, EXTL3, STMN4, SLC18A1, MSR1, ADAM28, LZTS1, ADAM7, FGF20, PCM1, FDFT1, DPYSL2, PDGFRL, ZDHHC2, TRIM35, FZD3, INTS9, SH2D4A, INTS10, SLC39A14, LEPROTL1, DCTN6, R3HCC1, GSR, TNFRSF10A, UBXN8, PPP2CB, NEFM, TUSC3, KCTD9, FGL1, ASAH1, BNIP3L, DUSP4, CLU, TNFRSF10B, SORBS3, PTK2B, CHRNA2, ADRA1A, PPP3CC, PDLIM2, EPHX2, MTUS1, XPO7, TEX15, SARAF, LOXL2, ELP3, PEBP4, ADAMDEC1, FA…
BLCA	chr22:47571204-51304566	Deletion	HDAC10	MAPK8IP2, TYMP, NCAPH2, MOV10L1, PANX2, SELO, RABL2B, PPP6R2, SBF1, MIOX, LMF2, CHKB, ARSA, ACR, BRD1, ZBED4, MLC1, HDAC10, TUBGCP6, ADM2, KLHDC7B, SCO2, TTLL8, TRABD, ODF3B, ALG12, CRELD2, MAPK11, MAPK12, IL17REL, PLXNB2, PIM3, CPT1B, DENND6B, SYCE3, FAM19A5, CHKB-CPT1B, AL022328.1 ,
BLCA	chr6:67919847-123071476	Deletion	HDAC2	SLC22A16, IBTK, REV3L, FYN, PGM3, RWDD2A, UFL1, RRAGD, HSF2, SEC63, GOPC, ROS1, METTL24, TRAF3IP2, PRDM1, ATG5, SNAP91, CYB5R4, ME1, TUBE1, RIMS1, DDX43, SESN1, OSTM1, FAM135A, COL19A1, DOPEY1, LYRM2, BCKDHB, PREP, HACE1, COL12A1, FRK, DSE, RWDD1, RSPH4A, SMIM8, CEP85L, ASF1A, MCM9, FAM184A, RNGTT, MAN1A1, GABRR2, SERINC1, MDN1, BACH2, FHL5, GPR63, FBXL4, CCNC, PRDM13, SIM1, ASCC3, BVES, COL9A1, …
BLCA	chr2:225158126-243199373	Deletion	HDAC4	FARP2, CUL3, C2orf83, GPC1, ASB1, NGEF, SP100, HDAC4, PRLH, SPP2, DGKD, SP140, COL4A4, ATG16L1, USP40, CCL20, NCL, EFHD1, KCNJ13, NEU2, MLPH, HDLBP, PPP1R7, PASK, STK25, MTERF4, HJURP, DAW1, FAM124B, LRRFIP1, RAB17, SH3BP4, KIF1A, NDUFA10, SAG, IQCA1, ILKAP, PER2, RAMP1, SCLY, GPR55, SP110, CHRND, DOCK10, HTR2B, ITM2C, SLC19A3, EIF4E2, ARMC9, CAB39, RNPEPL1, CAPN10, NYAP2, RHBDD1, ACKR3, TRPM8, H…
BLCA	chr11:102773138-135006516	Deletion	KMT2A	VSIG2, PHLDB1, GRAMD1B, USP2, BARX2, USP28, SPA17, CDON, ACAT1, REXO2, RBM7, MCAM, IGSF9B, APLP2, ZW10, ALG9, NXPE1, ARCN1, DDX25, CRYAB, ZBTB16, ZPR1, TECTA, SC5D, CRTAM, C11orf63, B3GAT1, HSPA8, VWA5A, SIAE, PUS3, DCPS, FOXRED1, ST3GAL4, APOA5, APOA4, APOC3, CEP164, IL10RA, UBE4A, DDX6, UPK2, CBL, PVRL1, SLC35F2, ELMOD1, EXPH5, POU2AF1, KMT2A, TREH, IFT46, APOA1, RPS25, SNX19, KCNJ5, MSANTD2, T…
BLCA	chr2:225158126-243199373	Deletion	SP100	FARP2, CUL3, C2orf83, GPC1, ASB1, NGEF, SP100, HDAC4, PRLH, SPP2, DGKD, SP140, COL4A4, ATG16L1, USP40, CCL20, NCL, EFHD1, KCNJ13, NEU2, MLPH, HDLBP, PPP1R7, PASK, STK25, MTERF4, HJURP, DAW1, FAM124B, LRRFIP1, RAB17, SH3BP4, KIF1A, NDUFA10, SAG, IQCA1, ILKAP, PER2, RAMP1, SCLY, GPR55, SP110, CHRND, DOCK10, HTR2B, ITM2C, SLC19A3, EIF4E2, ARMC9, CAB39, RNPEPL1, CAPN10, NYAP2, RHBDD1, ACKR3, TRPM8, H…
BLCA	chr2:225158126-243199373	Deletion	SP110	FARP2, CUL3, C2orf83, GPC1, ASB1, NGEF, SP100, HDAC4, PRLH, SPP2, DGKD, SP140, COL4A4, ATG16L1, USP40, CCL20, NCL, EFHD1, KCNJ13, NEU2, MLPH, HDLBP, PPP1R7, PASK, STK25, MTERF4, HJURP, DAW1, FAM124B, LRRFIP1, RAB17, SH3BP4, KIF1A, NDUFA10, SAG, IQCA1, ILKAP, PER2, RAMP1, SCLY, GPR55, SP110, CHRND, DOCK10, HTR2B, ITM2C, SLC19A3, EIF4E2, ARMC9, CAB39, RNPEPL1, CAPN10, NYAP2, RHBDD1, ACKR3, TRPM8, H…
BLCA	chr2:225158126-243199373	Deletion	SP140	FARP2, CUL3, C2orf83, GPC1, ASB1, NGEF, SP100, HDAC4, PRLH, SPP2, DGKD, SP140, COL4A4, ATG16L1, USP40, CCL20, NCL, EFHD1, KCNJ13, NEU2, MLPH, HDLBP, PPP1R7, PASK, STK25, MTERF4, HJURP, DAW1, FAM124B, LRRFIP1, RAB17, SH3BP4, KIF1A, NDUFA10, SAG, IQCA1, ILKAP, PER2, RAMP1, SCLY, GPR55, SP110, CHRND, DOCK10, HTR2B, ITM2C, SLC19A3, EIF4E2, ARMC9, CAB39, RNPEPL1, CAPN10, NYAP2, RHBDD1, ACKR3, TRPM8, H…
BLCA	chr2:225158126-243199373	Deletion	SP140L	FARP2, CUL3, C2orf83, GPC1, ASB1, NGEF, SP100, HDAC4, PRLH, SPP2, DGKD, SP140, COL4A4, ATG16L1, USP40, CCL20, NCL, EFHD1, KCNJ13, NEU2, MLPH, HDLBP, PPP1R7, PASK, STK25, MTERF4, HJURP, DAW1, FAM124B, LRRFIP1, RAB17, SH3BP4, KIF1A, NDUFA10, SAG, IQCA1, ILKAP, PER2, RAMP1, SCLY, GPR55, SP110, CHRND, DOCK10, HTR2B, ITM2C, SLC19A3, EIF4E2, ARMC9, CAB39, RNPEPL1, CAPN10, NYAP2, RHBDD1, ACKR3, TRPM8, H…
BRCA	chr2:236085566-243199373	Deletion	HDAC4	FARP2, GPC1, ASB1, HDAC4, PRLH, MLPH, HDLBP, PPP1R7, PASK, STK25, MTERF4, LRRFIP1, RAB17, KIF1A, NDUFA10, IQCA1, ILKAP, PER2, RAMP1, SCLY, RNPEPL1, CAPN10, ACKR3, HES6, ESPNL, ANKMY1, ANO7, GAL3ST2, AGAP1, SNED1, COL6A3, 2-Sep, DTYMK, ING5, ATG4B, KLHL30, GBX2, MYEOV2, C2orf54, AGXT, BOK, THAP4, RBM44, OR6B3, OTOS, GPR35, FAM132B, D2HGDH, OR6B2, ASB18, UBE2F, AQP12A, AQP12B, RTP5, PDCD1, DUSP28, …
BRCA	chr3:46499173-63216552	Deletion	PBRM1	SEMA3F, RBM5, RBM6, ZMYND10, CACNA2D2, CELSR3, UQCRC1, PHF7, SEMA3G, NISCH, STAB1, SEMA3B, LTF, CHDH, GLT8D1, ALAS1, PARP3, MAP4, ITIH4, ITIH1, IL17RB, RHOA, HYAL2, RASSF1, IP6K2, PTPN23, DOCK3, C3orf18, KIF9, PCBP4, SELK, ACTR8, WNT5A, PFKFB4, COL7A1, PRKAR2A, USP4, GNAT1, GNAI2, HYAL1, TUSC2, NPRL2, CYB561D2, C3orf14, CSPG5, KLHL18, SCAP, HEMK1, CISH, MAPKAPK3, RRP9, ABHD14B, ABHD14A-ACY1, DNAH…
BRCA	chr11:1-549958	Deletion	SIRT3	RNH1, SIRT3, IFITM3, ATHL1, LRRC56, HRAS, NLRP6, PTDSS2, ODF3, BET1L, RIC8A, B4GALNT4, PKP3, ANO9, SIGIRR, IFITM2, PSMD13, IFITM1, SCGB1C1, IFITM5, FO082796.1, SCGB1C2 ,
CESC	chr2:213401694-243199373	Deletion	HDAC4	FARP2, SLC11A1, IKZF2, CUL3, C2orf83, PTPRN, GPC1, ASB1, NGEF, SP100, HDAC4, PRLH, SPP2, ASIC4, SPEG, BCS1L, DGKD, XRCC5, SP140, TNS1, COL4A4, WDFY1, ATG16L1, USP40, SLC4A3, CCL20, NCL, FN1, PECR, IGFBP2, IGFBP5, EFHD1, KCNJ13, NEU2, PLCD4, ZNF142, PRKAG3, WNT6, MLPH, CNPPD1, ABCB6, STK16, HDLBP, PPP1R7, PASK, STK25, EPHA4, FARSB, MREG, TNP1, MTERF4, HJURP, DAW1, ACSL3, CHPF, DNPEP, INHA, MOGAT1,…
CESC	chr11:113147632-135006516	Deletion	KMT2A	VSIG2, PHLDB1, GRAMD1B, USP2, BARX2, USP28, SPA17, CDON, REXO2, RBM7, MCAM, IGSF9B, APLP2, ZW10, NXPE1, ARCN1, DDX25, ZBTB16, ZPR1, TECTA, SC5D, CRTAM, C11orf63, B3GAT1, HSPA8, VWA5A, SIAE, PUS3, DCPS, FOXRED1, ST3GAL4, APOA5, APOA4, APOC3, CEP164, IL10RA, UBE4A, DDX6, UPK2, CBL, PVRL1, KMT2A, TREH, IFT46, APOA1, RPS25, SNX19, KCNJ5, MSANTD2, TP53AIP1, ARHGAP32, STT3A, ADAMTS8, ACRV1, ETS1, SLC37…
CESC	chr2:213401694-243199373	Deletion	SP100	FARP2, SLC11A1, IKZF2, CUL3, C2orf83, PTPRN, GPC1, ASB1, NGEF, SP100, HDAC4, PRLH, SPP2, ASIC4, SPEG, BCS1L, DGKD, XRCC5, SP140, TNS1, COL4A4, WDFY1, ATG16L1, USP40, SLC4A3, CCL20, NCL, FN1, PECR, IGFBP2, IGFBP5, EFHD1, KCNJ13, NEU2, PLCD4, ZNF142, PRKAG3, WNT6, MLPH, CNPPD1, ABCB6, STK16, HDLBP, PPP1R7, PASK, STK25, EPHA4, FARSB, MREG, TNP1, MTERF4, HJURP, DAW1, ACSL3, CHPF, DNPEP, INHA, MOGAT1,…
CESC	chr2:213401694-243199373	Deletion	SP110	FARP2, SLC11A1, IKZF2, CUL3, C2orf83, PTPRN, GPC1, ASB1, NGEF, SP100, HDAC4, PRLH, SPP2, ASIC4, SPEG, BCS1L, DGKD, XRCC5, SP140, TNS1, COL4A4, WDFY1, ATG16L1, USP40, SLC4A3, CCL20, NCL, FN1, PECR, IGFBP2, IGFBP5, EFHD1, KCNJ13, NEU2, PLCD4, ZNF142, PRKAG3, WNT6, MLPH, CNPPD1, ABCB6, STK16, HDLBP, PPP1R7, PASK, STK25, EPHA4, FARSB, MREG, TNP1, MTERF4, HJURP, DAW1, ACSL3, CHPF, DNPEP, INHA, MOGAT1,…
CESC	chr2:213401694-243199373	Deletion	SP140L	FARP2, SLC11A1, IKZF2, CUL3, C2orf83, PTPRN, GPC1, ASB1, NGEF, SP100, HDAC4, PRLH, SPP2, ASIC4, SPEG, BCS1L, DGKD, XRCC5, SP140, TNS1, COL4A4, WDFY1, ATG16L1, USP40, SLC4A3, CCL20, NCL, FN1, PECR, IGFBP2, IGFBP5, EFHD1, KCNJ13, NEU2, PLCD4, ZNF142, PRKAG3, WNT6, MLPH, CNPPD1, ABCB6, STK16, HDLBP, PPP1R7, PASK, STK25, EPHA4, FARSB, MREG, TNP1, MTERF4, HJURP, DAW1, ACSL3, CHPF, DNPEP, INHA, MOGAT1,…
CHOL	chr3:1-24163020	Deletion	BRPF1	RAD18, LMCD1, TRNT1, MKRN2, TMEM40, IL5RA, DAZL, CRBN, OGG1, KAT2B, EMC3, SSUH2, SGOL1, MRPS25, SH3BP5, HACL1, TBC1D5, CAPN7, RFTN1, C3orf20, RBSN, GALNT15, SLC6A6, RAF1, SLC6A11, PPARG, NUP210, IRAK2, CAMK1, THUMPD3, VHL, BHLHE40, ARL8B, EDEM1, CNTN6, CHL1, SUMF1, CPNE9, FANCD2, TAMM41, VGLL4, RAB5A, GRIP2, EAF1, CNTN4, IQSEC1, CAND2, RPL32, ITPR1, ZNF385D, TSEN2, WNT7A, XPC, CCDC174, FGD5, DPH3…
CHOL	chr3:1-24163020	Deletion	KAT2B	RAD18, LMCD1, TRNT1, MKRN2, TMEM40, IL5RA, DAZL, CRBN, OGG1, KAT2B, EMC3, SSUH2, SGOL1, MRPS25, SH3BP5, HACL1, TBC1D5, CAPN7, RFTN1, C3orf20, RBSN, GALNT15, SLC6A6, RAF1, SLC6A11, PPARG, NUP210, IRAK2, CAMK1, THUMPD3, VHL, BHLHE40, ARL8B, EDEM1, CNTN6, CHL1, SUMF1, CPNE9, FANCD2, TAMM41, VGLL4, RAB5A, GRIP2, EAF1, CNTN4, IQSEC1, CAND2, RPL32, ITPR1, ZNF385D, TSEN2, WNT7A, XPC, CCDC174, FGD5, DPH3…
CHOL	chr3:46916934-78650559	Deletion	PBRM1	SEMA3F, RBM5, RBM6, ZMYND10, CACNA2D2, CELSR3, UQCRC1, PHF7, SEMA3G, NISCH, STAB1, SEMA3B, CHDH, GLT8D1, ALAS1, PARP3, MAP4, ITIH4, ITIH1, IL17RB, RHOA, HYAL2, RASSF1, IP6K2, PTPN23, DOCK3, C3orf18, KIF9, PCBP4, CNTN3, SELK, ACTR8, WNT5A, PFKFB4, COL7A1, PRKAR2A, USP4, GNAT1, GNAI2, HYAL1, TUSC2, NPRL2, CYB561D2, C3orf14, FRMD4B, CSPG5, KLHL18, SCAP, HEMK1, CISH, MAPKAPK3, RRP9, ABHD14B, ABHD14A-…
CHOL	chr12:84052847-133851895	Deletion	SIRT4	CRY1, DCN, NR1H4, POLR3B, IGF1, RNF10, VEZT, ZCCHC8, KITLG, MPHOSPH9, TMCC3, CDK17, RIMBP2, SFSWAP, ATP2B1, SLC6A15, CHFR, SCARB1, NTN4, NUAK1, WSCD2, ACTR6, NUP37, SLC25A3, SART3, UNG, ANKRD13A, ACACB, AACS, EPYC, HAL, SSH1, TMED2, DYNLL1, TESC, RPL6, MAPKAPK5, P2RX7, ANAPC5, SLC8B1, KDM2B, LHX5, OAS1, GCN1L1, RPLP0, PXN, SIRT4, RPH3A, PEBP1, TBX5, BRAP, ERP29, NOS1, ZNF268, GOLGA3, PITPNM2, EEA…
ESCA	chr22:1-18122598	Deletion	CECR2	CECR5, CECR1, CECR2, ATP6V1E1, XKR3, IL17RA, SLC25A18, CECR6, CCT8L2, GAB4 ,
ESCA	chr2:210686861-243199373	Deletion	HDAC4	FARP2, SLC11A1, CPS1, IKZF2, CUL3, C2orf83, PTPRN, GPC1, ASB1, NGEF, SP100, HDAC4, PRLH, SPP2, ASIC4, SPEG, BCS1L, DGKD, XRCC5, SP140, TNS1, COL4A4, WDFY1, ATG16L1, USP40, SLC4A3, CCL20, NCL, ACADL, LANCL1, FN1, PECR, IGFBP2, IGFBP5, EFHD1, KCNJ13, NEU2, PLCD4, ZNF142, PRKAG3, WNT6, MLPH, CNPPD1, ABCB6, STK16, HDLBP, PPP1R7, PASK, STK25, EPHA4, FARSB, MREG, TNP1, MTERF4, HJURP, DAW1, ACSL3, CHPF,…
ESCA	chr11:1-3542060	Deletion	SIRT3	ZNF195, OSBPL5, RNH1, KCNQ1, TSPAN32, DRD4, SCT, PHRF1, TRPM5, TOLLIP, CDHR5, RASSF7, CARS, SLC22A18, CD81, C11orf21, MUC5B, CTSD, CDKN1C, INS-IGF2, LSP1, TNNT3, TNNI2, SIRT3, IFITM3, ATHL1, SYT8, LRRC56, IGF2, BRSK2, HRAS, NLRP6, PTDSS2, DEAF1, TMEM80, EPS8L2, TALDO1, PDDC1, SLC25A22, PIDD1, RPLP2, PNPLA2, CRACR2B, CD151, POLR2L, CHID1, ODF3, BET1L, RIC8A, TH, PHLDA2, MRGPRG, MOB2, B4GALNT4, AP2…
ESCA	chr2:210686861-243199373	Deletion	SP100	FARP2, SLC11A1, CPS1, IKZF2, CUL3, C2orf83, PTPRN, GPC1, ASB1, NGEF, SP100, HDAC4, PRLH, SPP2, ASIC4, SPEG, BCS1L, DGKD, XRCC5, SP140, TNS1, COL4A4, WDFY1, ATG16L1, USP40, SLC4A3, CCL20, NCL, ACADL, LANCL1, FN1, PECR, IGFBP2, IGFBP5, EFHD1, KCNJ13, NEU2, PLCD4, ZNF142, PRKAG3, WNT6, MLPH, CNPPD1, ABCB6, STK16, HDLBP, PPP1R7, PASK, STK25, EPHA4, FARSB, MREG, TNP1, MTERF4, HJURP, DAW1, ACSL3, CHPF,…
ESCA	chr2:210686861-243199373	Deletion	SP110	FARP2, SLC11A1, CPS1, IKZF2, CUL3, C2orf83, PTPRN, GPC1, ASB1, NGEF, SP100, HDAC4, PRLH, SPP2, ASIC4, SPEG, BCS1L, DGKD, XRCC5, SP140, TNS1, COL4A4, WDFY1, ATG16L1, USP40, SLC4A3, CCL20, NCL, ACADL, LANCL1, FN1, PECR, IGFBP2, IGFBP5, EFHD1, KCNJ13, NEU2, PLCD4, ZNF142, PRKAG3, WNT6, MLPH, CNPPD1, ABCB6, STK16, HDLBP, PPP1R7, PASK, STK25, EPHA4, FARSB, MREG, TNP1, MTERF4, HJURP, DAW1, ACSL3, CHPF,…
ESCA	chr2:210686861-243199373	Deletion	SP140L	FARP2, SLC11A1, CPS1, IKZF2, CUL3, C2orf83, PTPRN, GPC1, ASB1, NGEF, SP100, HDAC4, PRLH, SPP2, ASIC4, SPEG, BCS1L, DGKD, XRCC5, SP140, TNS1, COL4A4, WDFY1, ATG16L1, USP40, SLC4A3, CCL20, NCL, ACADL, LANCL1, FN1, PECR, IGFBP2, IGFBP5, EFHD1, KCNJ13, NEU2, PLCD4, ZNF142, PRKAG3, WNT6, MLPH, CNPPD1, ABCB6, STK16, HDLBP, PPP1R7, PASK, STK25, EPHA4, FARSB, MREG, TNP1, MTERF4, HJURP, DAW1, ACSL3, CHPF,…
ESCA	chr1:113549936-117457733	Deletion	TRIM33	CSDE1, SIKE1, RSBN1, MAGI3, AMPD1, BCAS2, OLFML3, PHTF1, CD58, CD2, DCLRE1B, CASQ2, TSPAN2, TSHB, SYT6, PTPN22, NGF, AP4B1, IGSF3, HIPK1, SLC22A15, ATP1A1, MAB21L3, VANGL1, DENND2C, NHLH2, BCL2L15, TRIM33, SYCP1, LRIG2, C1orf137, NRAS ,
GBM	chr22:48454079-51304566	Deletion	BRD1	MAPK8IP2, TYMP, NCAPH2, MOV10L1, PANX2, SELO, RABL2B, PPP6R2, SBF1, MIOX, LMF2, CHKB, ARSA, ACR, BRD1, ZBED4, MLC1, HDAC10, TUBGCP6, ADM2, KLHDC7B, SCO2, TTLL8, TRABD, ODF3B, ALG12, CRELD2, MAPK11, MAPK12, IL17REL, PLXNB2, PIM3, CPT1B, DENND6B, SYCE3, FAM19A5, CHKB-CPT1B, AL022328.1 ,
GBM	chr22:48454079-51304566	Deletion	HDAC10	MAPK8IP2, TYMP, NCAPH2, MOV10L1, PANX2, SELO, RABL2B, PPP6R2, SBF1, MIOX, LMF2, CHKB, ARSA, ACR, BRD1, ZBED4, MLC1, HDAC10, TUBGCP6, ADM2, KLHDC7B, SCO2, TTLL8, TRABD, ODF3B, ALG12, CRELD2, MAPK11, MAPK12, IL17REL, PLXNB2, PIM3, CPT1B, DENND6B, SYCE3, FAM19A5, CHKB-CPT1B, AL022328.1 ,
HNSC	chr2:215095316-243199373	Deletion	HDAC4	FARP2, SLC11A1, CUL3, C2orf83, PTPRN, GPC1, ASB1, NGEF, SP100, HDAC4, PRLH, SPP2, ASIC4, SPEG, BCS1L, DGKD, XRCC5, SP140, TNS1, COL4A4, WDFY1, ATG16L1, USP40, SLC4A3, CCL20, NCL, FN1, PECR, IGFBP2, IGFBP5, EFHD1, KCNJ13, NEU2, PLCD4, ZNF142, PRKAG3, WNT6, MLPH, CNPPD1, ABCB6, STK16, HDLBP, PPP1R7, PASK, STK25, EPHA4, FARSB, MREG, TNP1, MTERF4, HJURP, DAW1, ACSL3, CHPF, DNPEP, INHA, MOGAT1, OBSL1,…
HNSC	chr2:215095316-243199373	Deletion	SP100	FARP2, SLC11A1, CUL3, C2orf83, PTPRN, GPC1, ASB1, NGEF, SP100, HDAC4, PRLH, SPP2, ASIC4, SPEG, BCS1L, DGKD, XRCC5, SP140, TNS1, COL4A4, WDFY1, ATG16L1, USP40, SLC4A3, CCL20, NCL, FN1, PECR, IGFBP2, IGFBP5, EFHD1, KCNJ13, NEU2, PLCD4, ZNF142, PRKAG3, WNT6, MLPH, CNPPD1, ABCB6, STK16, HDLBP, PPP1R7, PASK, STK25, EPHA4, FARSB, MREG, TNP1, MTERF4, HJURP, DAW1, ACSL3, CHPF, DNPEP, INHA, MOGAT1, OBSL1,…
HNSC	chr2:215095316-243199373	Deletion	SP110	FARP2, SLC11A1, CUL3, C2orf83, PTPRN, GPC1, ASB1, NGEF, SP100, HDAC4, PRLH, SPP2, ASIC4, SPEG, BCS1L, DGKD, XRCC5, SP140, TNS1, COL4A4, WDFY1, ATG16L1, USP40, SLC4A3, CCL20, NCL, FN1, PECR, IGFBP2, IGFBP5, EFHD1, KCNJ13, NEU2, PLCD4, ZNF142, PRKAG3, WNT6, MLPH, CNPPD1, ABCB6, STK16, HDLBP, PPP1R7, PASK, STK25, EPHA4, FARSB, MREG, TNP1, MTERF4, HJURP, DAW1, ACSL3, CHPF, DNPEP, INHA, MOGAT1, OBSL1,…
HNSC	chr2:215095316-243199373	Deletion	SP140	FARP2, SLC11A1, CUL3, C2orf83, PTPRN, GPC1, ASB1, NGEF, SP100, HDAC4, PRLH, SPP2, ASIC4, SPEG, BCS1L, DGKD, XRCC5, SP140, TNS1, COL4A4, WDFY1, ATG16L1, USP40, SLC4A3, CCL20, NCL, FN1, PECR, IGFBP2, IGFBP5, EFHD1, KCNJ13, NEU2, PLCD4, ZNF142, PRKAG3, WNT6, MLPH, CNPPD1, ABCB6, STK16, HDLBP, PPP1R7, PASK, STK25, EPHA4, FARSB, MREG, TNP1, MTERF4, HJURP, DAW1, ACSL3, CHPF, DNPEP, INHA, MOGAT1, OBSL1,…
HNSC	chr2:215095316-243199373	Deletion	SP140L	FARP2, SLC11A1, CUL3, C2orf83, PTPRN, GPC1, ASB1, NGEF, SP100, HDAC4, PRLH, SPP2, ASIC4, SPEG, BCS1L, DGKD, XRCC5, SP140, TNS1, COL4A4, WDFY1, ATG16L1, USP40, SLC4A3, CCL20, NCL, FN1, PECR, IGFBP2, IGFBP5, EFHD1, KCNJ13, NEU2, PLCD4, ZNF142, PRKAG3, WNT6, MLPH, CNPPD1, ABCB6, STK16, HDLBP, PPP1R7, PASK, STK25, EPHA4, FARSB, MREG, TNP1, MTERF4, HJURP, DAW1, ACSL3, CHPF, DNPEP, INHA, MOGAT1, OBSL1,…
HNSC	chr1:112539411-149881397	Deletion	TRIM33	ST7L, CSDE1, SIKE1, WDR3, RSBN1, MAGI3, TBX15, PHGDH, BCL9, CAPZA1, AMPD1, BCAS2, OLFML3, PHTF1, CD58, CD2, TTF2, WARS2, HAO2, GPR89A, CD160, DCLRE1B, CASQ2, GJA8, POLR3GL, CHD1L, PEX11B, FMO5, PIAS3, PRKAB2, REG4, TSPAN2, TSHB, SYT6, HMGCS2, PTPN22, WNT2B, PTGFRN, ADAM30, NOTCH2, TRIM45, CD101, VTCN1, NGF, AP4B1, IGSF3, ZNF697, CTTNBP2NL, ITGA10, FCGR1A, MOV10, RHOC, PPM1J, SLC16A1, SPAG17, ACP6…
KIRC	chr3:8228631-52980352	Deletion	BRPF1	SEMA3F, RBM5, RBM6, ZMYND10, CACNA2D2, DLEC1, CELSR3, SS18L2, UQCRC1, HHATL, PHF7, SEMA3G, NISCH, STAB1, ABHD5, LARS2, SEMA3B, LTF, GLT8D1, ALAS1, SLC4A7, PARP3, MAP4, ITIH4, ITIH1, ACAA1, RHOA, HYAL2, RASSF1, IP6K2, RAD18, LMCD1, EXOSC7, MKRN2, PTPN23, MLH1, RARB, TOP2B, DOCK3, C3orf18, TMEM40, KIF9, PCBP4, CMTM6, DAZL, LRRFIP2, SEC22C, XYLB, OGG1, KAT2B, PFKFB4, COL7A1, PRKAR2A, USP4, GNAT1, GN…
KIRC	chr3:8228631-52980352	Deletion	HDAC11	SEMA3F, RBM5, RBM6, ZMYND10, CACNA2D2, DLEC1, CELSR3, SS18L2, UQCRC1, HHATL, PHF7, SEMA3G, NISCH, STAB1, ABHD5, LARS2, SEMA3B, LTF, GLT8D1, ALAS1, SLC4A7, PARP3, MAP4, ITIH4, ITIH1, ACAA1, RHOA, HYAL2, RASSF1, IP6K2, RAD18, LMCD1, EXOSC7, MKRN2, PTPN23, MLH1, RARB, TOP2B, DOCK3, C3orf18, TMEM40, KIF9, PCBP4, CMTM6, DAZL, LRRFIP2, SEC22C, XYLB, OGG1, KAT2B, PFKFB4, COL7A1, PRKAR2A, USP4, GNAT1, GN…
KIRC	chr3:8228631-52980352	Deletion	PBRM1	SEMA3F, RBM5, RBM6, ZMYND10, CACNA2D2, DLEC1, CELSR3, SS18L2, UQCRC1, HHATL, PHF7, SEMA3G, NISCH, STAB1, ABHD5, LARS2, SEMA3B, LTF, GLT8D1, ALAS1, SLC4A7, PARP3, MAP4, ITIH4, ITIH1, ACAA1, RHOA, HYAL2, RASSF1, IP6K2, RAD18, LMCD1, EXOSC7, MKRN2, PTPN23, MLH1, RARB, TOP2B, DOCK3, C3orf18, TMEM40, KIF9, PCBP4, CMTM6, DAZL, LRRFIP2, SEC22C, XYLB, OGG1, KAT2B, PFKFB4, COL7A1, PRKAR2A, USP4, GNAT1, GN…
LGG	chr11:1-1909005	Deletion	SIRT3	RNH1, DRD4, SCT, PHRF1, TOLLIP, CDHR5, RASSF7, MUC5B, CTSD, LSP1, TNNI2, SIRT3, IFITM3, ATHL1, SYT8, LRRC56, BRSK2, HRAS, NLRP6, PTDSS2, DEAF1, TMEM80, EPS8L2, TALDO1, PDDC1, SLC25A22, PIDD1, RPLP2, PNPLA2, CRACR2B, CD151, POLR2L, CHID1, ODF3, BET1L, RIC8A, MOB2, B4GALNT4, AP2A2, PKP3, CEND1, DUSP8, MUC6, ANO9, SIGIRR, IFITM2, IRF7, LMNTD2, PSMD13, IFITM1, KRTAP5-5, SCGB1C1, KRTAP5-3, KRTAP5-6, K…
LUAD	chr22:46723702-51304566	Deletion	BRD1	MAPK8IP2, TYMP, NCAPH2, TBC1D22A, MOV10L1, PANX2, SELO, GRAMD4, CELSR1, RABL2B, PPP6R2, SBF1, MIOX, LMF2, CHKB, ARSA, ACR, TRMU, CERK, BRD1, ZBED4, MLC1, HDAC10, TUBGCP6, ADM2, KLHDC7B, SCO2, TTLL8, TRABD, ODF3B, ALG12, CRELD2, MAPK11, MAPK12, IL17REL, PLXNB2, PIM3, CPT1B, DENND6B, SYCE3, FAM19A5, CHKB-CPT1B, FP325331.1, AL022328.1, U51561.1
LUAD	chr22:46723702-51304566	Deletion	HDAC10	MAPK8IP2, TYMP, NCAPH2, TBC1D22A, MOV10L1, PANX2, SELO, GRAMD4, CELSR1, RABL2B, PPP6R2, SBF1, MIOX, LMF2, CHKB, ARSA, ACR, TRMU, CERK, BRD1, ZBED4, MLC1, HDAC10, TUBGCP6, ADM2, KLHDC7B, SCO2, TTLL8, TRABD, ODF3B, ALG12, CRELD2, MAPK11, MAPK12, IL17REL, PLXNB2, PIM3, CPT1B, DENND6B, SYCE3, FAM19A5, CHKB-CPT1B, FP325331.1, AL022328.1, U51561.1
LUAD	chr1:98838036-149881397	Deletion	TRIM33	ST7L, CSDE1, SARS, SIKE1, COL11A1, DDX20, CHI3L2, GNAI3, WDR3, CDC14A, RSBN1, MAGI3, WDR47, OVGP1, SLC25A24, TBX15, PHGDH, PALMD, BCL9, STXBP3, KIAA1324, AMPD2, KCNC4, WDR77, ATP5F1, RAP1A, CAPZA1, AMPD1, BCAS2, OLFML3, PHTF1, CD58, CD2, TTF2, WARS2, HAO2, GPR89A, CD160, DPH5, LPPR5, LPPR4, SLC35A3, DCLRE1B, CASQ2, OLFM3, GJA8, POLR3GL, LRIF1, ADORA3, CLCC1, GPSM2, TRMT13, LRRC39, CHD1L, PEX11B, …
LUSC	chr16:3764793-3987522	Deletion	CREBBP	CREBBP
LUSC	chr2:213401694-243199373	Deletion	HDAC4	FARP2, SLC11A1, IKZF2, CUL3, C2orf83, PTPRN, GPC1, ASB1, NGEF, SP100, HDAC4, PRLH, SPP2, ASIC4, SPEG, BCS1L, DGKD, XRCC5, SP140, TNS1, COL4A4, WDFY1, ATG16L1, USP40, SLC4A3, CCL20, NCL, FN1, PECR, IGFBP2, IGFBP5, EFHD1, KCNJ13, NEU2, PLCD4, ZNF142, PRKAG3, WNT6, MLPH, CNPPD1, ABCB6, STK16, HDLBP, PPP1R7, PASK, STK25, EPHA4, FARSB, MREG, TNP1, MTERF4, HJURP, DAW1, ACSL3, CHPF, DNPEP, INHA, MOGAT1,…
LUSC	chr11:1-3877512	Deletion	SIRT3	ZNF195, OSBPL5, RNH1, KCNQ1, TSPAN32, DRD4, SCT, PHRF1, TRPM5, TOLLIP, CDHR5, RASSF7, CARS, SLC22A18, CD81, C11orf21, NUP98, MUC5B, CTSD, ART1, CHRNA10, CDKN1C, INS-IGF2, LSP1, TNNT3, TNNI2, SIRT3, IFITM3, ATHL1, PGAP2, SYT8, LRRC56, IGF2, ART5, BRSK2, HRAS, NLRP6, PTDSS2, DEAF1, TMEM80, RHOG, EPS8L2, TALDO1, PDDC1, SLC25A22, PIDD1, RPLP2, PNPLA2, CRACR2B, CD151, POLR2L, CHID1, ODF3, BET1L, RIC8A…
LUSC	chr2:213401694-243199373	Deletion	SP100	FARP2, SLC11A1, IKZF2, CUL3, C2orf83, PTPRN, GPC1, ASB1, NGEF, SP100, HDAC4, PRLH, SPP2, ASIC4, SPEG, BCS1L, DGKD, XRCC5, SP140, TNS1, COL4A4, WDFY1, ATG16L1, USP40, SLC4A3, CCL20, NCL, FN1, PECR, IGFBP2, IGFBP5, EFHD1, KCNJ13, NEU2, PLCD4, ZNF142, PRKAG3, WNT6, MLPH, CNPPD1, ABCB6, STK16, HDLBP, PPP1R7, PASK, STK25, EPHA4, FARSB, MREG, TNP1, MTERF4, HJURP, DAW1, ACSL3, CHPF, DNPEP, INHA, MOGAT1,…
LUSC	chr2:213401694-243199373	Deletion	SP110	FARP2, SLC11A1, IKZF2, CUL3, C2orf83, PTPRN, GPC1, ASB1, NGEF, SP100, HDAC4, PRLH, SPP2, ASIC4, SPEG, BCS1L, DGKD, XRCC5, SP140, TNS1, COL4A4, WDFY1, ATG16L1, USP40, SLC4A3, CCL20, NCL, FN1, PECR, IGFBP2, IGFBP5, EFHD1, KCNJ13, NEU2, PLCD4, ZNF142, PRKAG3, WNT6, MLPH, CNPPD1, ABCB6, STK16, HDLBP, PPP1R7, PASK, STK25, EPHA4, FARSB, MREG, TNP1, MTERF4, HJURP, DAW1, ACSL3, CHPF, DNPEP, INHA, MOGAT1,…
LUSC	chr2:213401694-243199373	Deletion	SP140	FARP2, SLC11A1, IKZF2, CUL3, C2orf83, PTPRN, GPC1, ASB1, NGEF, SP100, HDAC4, PRLH, SPP2, ASIC4, SPEG, BCS1L, DGKD, XRCC5, SP140, TNS1, COL4A4, WDFY1, ATG16L1, USP40, SLC4A3, CCL20, NCL, FN1, PECR, IGFBP2, IGFBP5, EFHD1, KCNJ13, NEU2, PLCD4, ZNF142, PRKAG3, WNT6, MLPH, CNPPD1, ABCB6, STK16, HDLBP, PPP1R7, PASK, STK25, EPHA4, FARSB, MREG, TNP1, MTERF4, HJURP, DAW1, ACSL3, CHPF, DNPEP, INHA, MOGAT1,…
LUSC	chr2:213401694-243199373	Deletion	SP140L	FARP2, SLC11A1, IKZF2, CUL3, C2orf83, PTPRN, GPC1, ASB1, NGEF, SP100, HDAC4, PRLH, SPP2, ASIC4, SPEG, BCS1L, DGKD, XRCC5, SP140, TNS1, COL4A4, WDFY1, ATG16L1, USP40, SLC4A3, CCL20, NCL, FN1, PECR, IGFBP2, IGFBP5, EFHD1, KCNJ13, NEU2, PLCD4, ZNF142, PRKAG3, WNT6, MLPH, CNPPD1, ABCB6, STK16, HDLBP, PPP1R7, PASK, STK25, EPHA4, FARSB, MREG, TNP1, MTERF4, HJURP, DAW1, ACSL3, CHPF, DNPEP, INHA, MOGAT1,…
LUSC	chr1:114515579-119157210	Deletion	TRIM33	CSDE1, SIKE1, WDR3, AMPD1, BCAS2, OLFML3, CD58, CD2, TTF2, CASQ2, TSPAN2, TSHB, SYT6, PTGFRN, TRIM45, CD101, VTCN1, NGF, IGSF3, SPAG17, SLC22A15, ATP1A1, MAB21L3, VANGL1, DENND2C, NHLH2, FAM46C, GDAP2, TRIM33, MAN1A2, SYCP1, C1orf137, NRAS
LUSC	chr10:1-979701	Deletion	ZMYND11	ZMYND11, LARP4B, DIP2C, PRR26, TUBB8
MESO	chr6:81266457-156701869	Deletion	HDAC2	FUCA2, SLC22A16, IBTK, REV3L, IYD, VTA1, FYN, HIVEP2, PGM3, RWDD2A, UFL1, IL20RA, CCDC28A, RRAGD, HSF2, SEC63, IFNGR1, TBPL1, BCLAF1, TFB1M, PEX3, GOPC, ROS1, HEBP2, METTL24, TAB2, GINM1, TRAF3IP2, PRDM1, ATG5, SNAP91, CYB5R4, ME1, TRMT11, IPCEF1, NOX3, TUBE1, EPB41L2, MOXD1, STX7, SESN1, OSTM1, DOPEY1, LYRM2, PREP, HACE1, ESR1, RGS17, VNN3, ECHDC1, FRK, DSE, RWDD1, RSPH4A, SMIM8, CEP85L, ASF1A, …
MESO	chr10:1-12393487	Deletion	ZMYND11	ZMYND11, WDR37, CELF2, GDI2, SEC61A2, PRKCQ, PFKP, IDI1, KLF6, GATA3, LARP4B, GTPBP4, PITRM1, FAM208B, ITIH5, FBXO18, RBM17, IL2RA, ANKRD16, ECHDC3, IL15RA, IDI2, PROSER2, USP6NL, DIP2C, UPF2, CDC123, AKR1C2, ITIH2, KIN, AKR1E2, NUDT5, ATP5C1, TAF3, PFKFB3, NET1, CALML3, CALML5, TUBAL3, UCN3, PRR26, DHTKD1, ADARB2, AKR1C1, AKR1C3, ASB13, AKR1C4, SFMBT2, TUBB8
OV	chr22:49145301-51304566	Deletion	BRD1	MAPK8IP2, TYMP, NCAPH2, MOV10L1, PANX2, SELO, RABL2B, PPP6R2, SBF1, MIOX, LMF2, CHKB, ARSA, ACR, BRD1, ZBED4, MLC1, HDAC10, TUBGCP6, ADM2, KLHDC7B, SCO2, TTLL8, TRABD, ODF3B, ALG12, CRELD2, MAPK11, MAPK12, IL17REL, PLXNB2, PIM3, CPT1B, DENND6B, SYCE3, CHKB-CPT1B, AL022328.1
OV	chr9:132141681-140151408	Deletion	BRD3	LAMC3, PHPT1, ENTPD2, FCN1, ABL1, NCS1, KCNT1, FUBP3, LHX3, EDF1, RAPGEF1, NPDC1, SETX, PTGDS, ABCA2, PAEP, OBP2A, MRPS2, SARDH, DBH, TTF1, GTF3C4, DDX31, BARHL1, AIF1L, FAM78A, NUP214, TRAF2, OLFM1, CAMSAP1, UBAC1, COL5A1, ASS1, PRDM12, EXOSC2, POMT1, UCK1, FIBCD1, PRRC2B, TOR1B, C9orf78, TOR1A, USP20, SURF4, GBGT1, SURF1, SURF2, SURF6, MED22, REXO4, RPL7A, GTF3C5, ASB6, NTMT1, PTGES, GPR107, C9…
OV	chr9:132141681-140151408	Deletion	GTF3C4	LAMC3, PHPT1, ENTPD2, FCN1, ABL1, NCS1, KCNT1, FUBP3, LHX3, EDF1, RAPGEF1, NPDC1, SETX, PTGDS, ABCA2, PAEP, OBP2A, MRPS2, SARDH, DBH, TTF1, GTF3C4, DDX31, BARHL1, AIF1L, FAM78A, NUP214, TRAF2, OLFM1, CAMSAP1, UBAC1, COL5A1, ASS1, PRDM12, EXOSC2, POMT1, UCK1, FIBCD1, PRRC2B, TOR1B, C9orf78, TOR1A, USP20, SURF4, GBGT1, SURF1, SURF2, SURF6, MED22, REXO4, RPL7A, GTF3C5, ASB6, NTMT1, PTGES, GPR107, C9…
OV	chr22:49145301-51304566	Deletion	HDAC10	MAPK8IP2, TYMP, NCAPH2, MOV10L1, PANX2, SELO, RABL2B, PPP6R2, SBF1, MIOX, LMF2, CHKB, ARSA, ACR, BRD1, ZBED4, MLC1, HDAC10, TUBGCP6, ADM2, KLHDC7B, SCO2, TTLL8, TRABD, ODF3B, ALG12, CRELD2, MAPK11, MAPK12, IL17REL, PLXNB2, PIM3, CPT1B, DENND6B, SYCE3, CHKB-CPT1B, AL022328.1
OV	chr3:47199055-61549567	Deletion	PBRM1	SEMA3F, RBM5, RBM6, ZMYND10, CACNA2D2, CELSR3, UQCRC1, PHF7, SEMA3G, NISCH, STAB1, SEMA3B, CHDH, GLT8D1, ALAS1, PARP3, MAP4, ITIH4, ITIH1, IL17RB, RHOA, HYAL2, RASSF1, IP6K2, PTPN23, DOCK3, C3orf18, KIF9, PCBP4, SELK, ACTR8, WNT5A, PFKFB4, COL7A1, PRKAR2A, USP4, GNAT1, GNAI2, HYAL1, TUSC2, NPRL2, CYB561D2, CSPG5, KLHL18, SCAP, HEMK1, CISH, MAPKAPK3, RRP9, ABHD14B, ABHD14A-ACY1, DNAH1, TNNC1, SPCS…
OV	chr11:1-772981	Deletion	SIRT3	RNH1, DRD4, SCT, PHRF1, CDHR5, RASSF7, SIRT3, IFITM3, ATHL1, LRRC56, HRAS, NLRP6, PTDSS2, DEAF1, TMEM80, EPS8L2, TALDO1, PDDC1, ODF3, BET1L, RIC8A, B4GALNT4, PKP3, ANO9, SIGIRR, IFITM2, IRF7, LMNTD2, PSMD13, IFITM1, SCGB1C1, IFITM5, FO082796.1, SCGB1C2 ,
PRAD	chr17:42102307-42554213	Deletion	HDAC5	SLC4A1, ITGA2B, SLC25A39, GRN, ATXN7L3, RUNDC3A, UBTF, HDAC5, C17orf53, G6PC3, LSM12, ASB16, FAM171A2, TMUB2, GPATCH8
READ	chr8:11649070-36956396	Deletion	ELP3	MTMR7, SLC7A2, RHOBTB2, EXTL3, STMN4, SLC18A1, MSR1, ADAM28, LZTS1, ADAM7, FGF20, PCM1, FDFT1, DPYSL2, PDGFRL, ZDHHC2, TRIM35, FZD3, INTS9, SH2D4A, INTS10, SLC39A14, LEPROTL1, DCTN6, R3HCC1, GSR, TNFRSF10A, UBXN8, PPP2CB, NEFM, TUSC3, KCTD9, FGL1, ASAH1, BNIP3L, DUSP4, CLU, TNFRSF10B, SORBS3, PTK2B, CHRNA2, ADRA1A, PPP3CC, PDLIM2, EPHX2, MTUS1, TTI2, XPO7, TEX15, SARAF, RNF122, DUSP26, LOXL2, ELP…
SARC	chr22:45682545-51304566	Deletion	BRD1	MAPK8IP2, TYMP, NCAPH2, TBC1D22A, MOV10L1, PANX2, SELO, GTSE1, TTC38, GRAMD4, CELSR1, SMC1B, FBLN1, RABL2B, PPP6R2, SBF1, MIOX, LMF2, CHKB, ARSA, ACR, UPK3A, FAM118A, TRMU, CERK, BRD1, ZBED4, MLC1, HDAC10, TUBGCP6, ADM2, RIBC2, KLHDC7B, SCO2, ATXN10, PKDREJ, TTLL8, TRABD, ODF3B, PRR34, ALG12, CRELD2, MAPK11, PPARA, WNT7B, MAPK12, IL17REL, PLXNB2, PIM3, CPT1B, DENND6B, CDPF1, SYCE3, FAM19A5, CHKB-…
SARC	chr22:45682545-51304566	Deletion	HDAC10	MAPK8IP2, TYMP, NCAPH2, TBC1D22A, MOV10L1, PANX2, SELO, GTSE1, TTC38, GRAMD4, CELSR1, SMC1B, FBLN1, RABL2B, PPP6R2, SBF1, MIOX, LMF2, CHKB, ARSA, ACR, UPK3A, FAM118A, TRMU, CERK, BRD1, ZBED4, MLC1, HDAC10, TUBGCP6, ADM2, RIBC2, KLHDC7B, SCO2, ATXN10, PKDREJ, TTLL8, TRABD, ODF3B, PRR34, ALG12, CRELD2, MAPK11, PPARA, WNT7B, MAPK12, IL17REL, PLXNB2, PIM3, CPT1B, DENND6B, CDPF1, SYCE3, FAM19A5, CHKB-…
SARC	chr2:239689766-241380539	Deletion	HDAC4	HDAC4, NDUFA10, MYEOV2, OR6B3, OTOS, OR6B2, PRR21, AC017028.10 ,
SARC	chr11:102832409-133713188	Deletion	KMT2A	VSIG2, PHLDB1, GRAMD1B, USP2, BARX2, USP28, SPA17, CDON, ACAT1, REXO2, RBM7, MCAM, APLP2, ZW10, ALG9, NXPE1, ARCN1, DDX25, CRYAB, ZBTB16, ZPR1, TECTA, SC5D, CRTAM, C11orf63, HSPA8, VWA5A, SIAE, PUS3, DCPS, FOXRED1, ST3GAL4, APOA5, APOA4, APOC3, CEP164, IL10RA, UBE4A, DDX6, UPK2, CBL, PVRL1, SLC35F2, ELMOD1, EXPH5, POU2AF1, KMT2A, TREH, IFT46, APOA1, RPS25, SNX19, KCNJ5, MSANTD2, TP53AIP1, ARHGAP3…
SARC	chr3:44108516-65439174	Deletion	PBRM1	SEMA3F, RBM5, RBM6, ZMYND10, CACNA2D2, CELSR3, UQCRC1, PHF7, SEMA3G, NISCH, STAB1, LARS2, SEMA3B, LTF, CHDH, GLT8D1, ALAS1, PARP3, MAP4, ITIH4, ITIH1, IL17RB, RHOA, HYAL2, RASSF1, IP6K2, EXOSC7, PTPN23, DOCK3, C3orf18, KIF9, PCBP4, SELK, ACTR8, WNT5A, PFKFB4, COL7A1, PRKAR2A, USP4, GNAT1, GNAI2, HYAL1, TUSC2, NPRL2, CYB561D2, C3orf14, CSPG5, KLHL18, SCAP, HEMK1, CISH, MAPKAPK3, RRP9, ABHD14B, ABH…
SARC	chr6:66543005-98629061	Deletion	PHIP	IBTK, PGM3, RWDD2A, UFL1, RRAGD, SNAP91, CYB5R4, ME1, RIMS1, DDX43, FAM135A, COL19A1, DOPEY1, LYRM2, BCKDHB, COL12A1, SMIM8, RNGTT, GABRR2, MDN1, BACH2, FHL5, GPR63, COL9A1, SMAP1, B3GAT2, COX7A2, TMEM30A, SENP6, IMPG1, TTK, FAM46A, TBX18, ELOVL4, FILIP1, CASP8AP2, HMGN3, UBE3D, CNR1, SPACA1, SLC17A5, OGFRL1, NDUFAF4, MTO1, BAI3, ANKRD6, HTR1B, KHDC1, CEP162, SYNCRIP, SNX14, NT5E, MRAP2, EPHA7, A…
SARC	chr11:1-500352	Deletion	SIRT3	SIRT3, IFITM3, ATHL1, NLRP6, PTDSS2, ODF3, BET1L, RIC8A, B4GALNT4, PKP3, ANO9, SIGIRR, IFITM2, PSMD13, IFITM1, SCGB1C1, IFITM5, FO082796.1, SCGB1C2
SARC	chr6:1-25056768	Deletion	SIRT5	MYLIP, JARID2, RANBP9, SERPINB1, DTNBP1, MCUR1, FOXC1, EDN1, HIVEP1, DSP, TDP2, MAK, TMEM14C, PAK1IP1, GCNT2, NEDD9, ADTRP, FAM65B, PHACTR1, CD83, RBM24, CAP2, E2F3, HDGFL1, GPLD1, ALDH5A1, ACOT13, C6orf62, GMNN, DUSP22, EXOC2, GMDS, PRPF4B, LY86, F13A1, SIRT5, MRS2, WRNIP1, SERPINB6, NQO2, SOX4, RREB1, SSR1, RIOK1, NRN1, SLC35B3, RPP40, ATXN1, NUP153, DEK, EEF1E1, GCM2, KIF13A, GMPR, TFAP2A, TME…
SARC	chr19:58264000-59128983	Deletion	TRIM28	SLC27A5, ZNF324, ZNF586, ZNF446, RPS5, MZF1, ZBTB45, A1BG, ZSCAN18, CHMP2A, UBE2M, TRIM28, ZNF132, ZNF256, ZSCAN1, ZNF837, ZNF606, ZNF584, ZNF274, ZNF417, ZNF497, ZNF135, C19orf18, ZNF552, ZNF329, ZSCAN22, ZNF418, ZNF544, ZNF587, ZNF814, ZNF324B, AC010642.1, CTD-2583A14.10, ZNF587B, CTD-2583A14.9, CTD-3138B18.4, RNF225, ZNF8 ,
SARC	chr10:1-742144	Deletion	ZMYND11	ZMYND11, DIP2C, PRR26, TUBB8 ,
SKCM	chr5:134664578-155310974	Deletion	BRD8	SLC6A7, RNF14, MATR3, CD74, FAM13B, MFAP3, CTNNA1, FAM114A2, WNT8A, TRPC7, NDST1, CAMK2A, TCOF1, PKD2L2, KIAA0141, PCDHB4, PCDHA6, PCDHGA2, MRPL22, GEMIN5, FAT2, RBM22, RBM27, POU4F3, CDC23, PCDHB2, HARS2, NME5, BRD8, KIF20A, HSPA9, PFDN1, HBEGF, SLC4A9, APBB3, TMCO6, SPARC, IK, HAND1, PCDHB3, PCDHB5, PCDHB6, PCDHB7, PCDHB15, GNPDA1, PCDH12, FGF1, NR3C1, H2AFY, TCERG1, DPYSL3, SMAD5, CSNK1A1, HMG…
SKCM	chr6:97453984-143634663	Deletion	HDAC2	SLC22A16, REV3L, FYN, HSF2, SEC63, GOPC, ROS1, METTL24, TRAF3IP2, PRDM1, ATG5, TRMT11, TUBE1, EPB41L2, MOXD1, STX7, SESN1, OSTM1, PREP, HACE1, VNN3, ECHDC1, FRK, DSE, RWDD1, RSPH4A, CEP85L, ASF1A, MCM9, FAM184A, MAN1A1, SERINC1, HDDC2, TPD52L1, HINT3, NCOA7, FBXL4, CCNC, PRDM13, SIM1, ASCC3, BVES, MED23, WASF1, AIM1, VNN1, VNN2, RPS12, EYA4, SOBP, NR2E1, SNX3, ZBTB24, FIG4, SLC16A10, WISP3, LAMA4…
SKCM	chr5:134664578-155310974	Deletion	HDAC3	SLC6A7, RNF14, MATR3, CD74, FAM13B, MFAP3, CTNNA1, FAM114A2, WNT8A, TRPC7, NDST1, CAMK2A, TCOF1, PKD2L2, KIAA0141, PCDHB4, PCDHA6, PCDHGA2, MRPL22, GEMIN5, FAT2, RBM22, RBM27, POU4F3, CDC23, PCDHB2, HARS2, NME5, BRD8, KIF20A, HSPA9, PFDN1, HBEGF, SLC4A9, APBB3, TMCO6, SPARC, IK, HAND1, PCDHB3, PCDHB5, PCDHB6, PCDHB7, PCDHB15, GNPDA1, PCDH12, FGF1, NR3C1, H2AFY, TCERG1, DPYSL3, SMAD5, CSNK1A1, HMG…
SKCM	chr2:239689766-242077298	Deletion	HDAC4	GPC1, HDAC4, PASK, MTERF4, KIF1A, NDUFA10, RNPEPL1, CAPN10, ANKMY1, SNED1, MYEOV2, C2orf54, AGXT, OR6B3, OTOS, GPR35, OR6B2, AQP12A, AQP12B, DUSP28, PRR21, AC104809.3, AC017028.10
UCEC	chr22:48022888-51304566	Deletion	BRD1	MAPK8IP2, TYMP, NCAPH2, MOV10L1, PANX2, SELO, RABL2B, PPP6R2, SBF1, MIOX, LMF2, CHKB, ARSA, ACR, BRD1, ZBED4, MLC1, HDAC10, TUBGCP6, ADM2, KLHDC7B, SCO2, TTLL8, TRABD, ODF3B, ALG12, CRELD2, MAPK11, MAPK12, IL17REL, PLXNB2, PIM3, CPT1B, DENND6B, SYCE3, FAM19A5, CHKB-CPT1B, AL022328.1 ,
UCEC	chr22:48022888-51304566	Deletion	HDAC10	MAPK8IP2, TYMP, NCAPH2, MOV10L1, PANX2, SELO, RABL2B, PPP6R2, SBF1, MIOX, LMF2, CHKB, ARSA, ACR, BRD1, ZBED4, MLC1, HDAC10, TUBGCP6, ADM2, KLHDC7B, SCO2, TTLL8, TRABD, ODF3B, ALG12, CRELD2, MAPK11, MAPK12, IL17REL, PLXNB2, PIM3, CPT1B, DENND6B, SYCE3, FAM19A5, CHKB-CPT1B, AL022328.1 ,
UCS	chr22:41958863-51304566	Deletion	BRD1	MAPK8IP2, TYMP, NCAPH2, TBC1D22A, PHF21B, MOV10L1, PANX2, SELO, GTSE1, TTC38, GRAMD4, CELSR1, SMC1B, FBLN1, RABL2B, NUP50, NHP2L1, CCDC134, CENPM, 3-Sep, CYP2D6, TCF20, POLDIP3, PPP6R2, SBF1, CYB5R3, MIOX, LMF2, PACSIN2, TTLL1, CHKB, BIK, MCAT, ARSA, TSPO, TTLL12, ACR, PNPLA5, PNPLA3, SAMM50, KIAA0930, UPK3A, FAM118A, TRMU, PMM1, DESI1, CERK, BRD1, ZBED4, MLC1, HDAC10, TUBGCP6, ADM2, A4GALT, RIBC…
UCS	chr16:1-90354753	Deletion	BRD7	NDUFAB1, PRSS22, ACSM3, AC004381.6, CIAPIN1, CREBBP, SOX8, ITGAL, GDE1, CACNG3, ZNF263, CX3CL1, TNFRSF12A, PRSS21, RPUSD1, RHBDF1, LUC7L, BAIAP3, TSR3, PIGQ, CRAMP1L, MMP25, IL32, PKD1, ZNF200, TMEM159, MVP, ALG1, CLEC16A, KIAA0556, TNFRSF17, SNX29, HERPUD1, PRSS8, POLR3E, FLYWCH1, UNKL, HAGH, SLC9A3R2, NTHL1, THUMPD1, ACSM2B, METTL22, ROGDI, VPS35, DNAJA2, PLA2G10, CNGB1, CFAP20, CSNK2A2, SLC12A…
UCS	chr9:1-141213431	Deletion	GTF3C4	FAM214B, PRSS3, RABGAP1, ERP44, MUSK, TNC, CNTLN, HSPA5, FAM120A, LAMC3, PHPT1, ENTPD2, TRAF1, RC3H2, DNAJC25, DMRT3, MSANTD3, IKBKAP, PTPN3, SLC44A1, FRMPD1, GBA2, BRINP1, RFX3, SMARCA2, KIAA0020, CDC14B, ZNF510, TRPM3, ZCCHC6, FCN1, DNAJA1, B4GALT1, CHMP5, NFX1, SPTLC1, EPB41L4B, TMEM38B, PSMD5, PTGS1, NUP188, CRAT, SH2D3C, NANS, TBC1D2, DFNB31, IFT74, JAK2, ABL1, PCSK5, ERMP1, MTAP, SPATA6L, S…
UCS	chr17:40064452-46371723	Deletion	HDAC5	SNX11, CDC27, SLC4A1, MEOX1, COPZ2, ITGA2B, OSBPL7, MAP3K14, BRCA1, SLC25A39, GRN, ATP6V0A1, TUBG2, DHX8, IFI35, COASY, PLEKHH3, ADAM11, TBX21, NSF, NFE2L1, ATXN7L3, KCNH4, TMEM101, RUNDC3A, UBTF, WNT3, KPNB1, GOSR2, PNPO, CDK5RAP3, CBX1, DHX58, KAT2A, RAB5C, NAGLU, HSD17B1, MLX, CNTNAP1, EZH1, PTGES3L-AARSD1, VAT1, RND2, HDAC5, PPY, MPP2, DUSP3, EFTUD2, KANSL1, CRHR1, C17orf53, STAT5A, WNK4, BEC…
UCS	chr17:40064452-46371723	Deletion	KAT2A	SNX11, CDC27, SLC4A1, MEOX1, COPZ2, ITGA2B, OSBPL7, MAP3K14, BRCA1, SLC25A39, GRN, ATP6V0A1, TUBG2, DHX8, IFI35, COASY, PLEKHH3, ADAM11, TBX21, NSF, NFE2L1, ATXN7L3, KCNH4, TMEM101, RUNDC3A, UBTF, WNT3, KPNB1, GOSR2, PNPO, CDK5RAP3, CBX1, DHX58, KAT2A, RAB5C, NAGLU, HSD17B1, MLX, CNTNAP1, EZH1, PTGES3L-AARSD1, VAT1, RND2, HDAC5, PPY, MPP2, DUSP3, EFTUD2, KANSL1, CRHR1, C17orf53, STAT5A, WNK4, BEC…
UCS	chr9:1-141213431	Deletion	KIAA2026	FAM214B, PRSS3, RABGAP1, ERP44, MUSK, TNC, CNTLN, HSPA5, FAM120A, LAMC3, PHPT1, ENTPD2, TRAF1, RC3H2, DNAJC25, DMRT3, MSANTD3, IKBKAP, PTPN3, SLC44A1, FRMPD1, GBA2, BRINP1, RFX3, SMARCA2, KIAA0020, CDC14B, ZNF510, TRPM3, ZCCHC6, FCN1, DNAJA1, B4GALT1, CHMP5, NFX1, SPTLC1, EPB41L4B, TMEM38B, PSMD5, PTGS1, NUP188, CRAT, SH2D3C, NANS, TBC1D2, DFNB31, IFT74, JAK2, ABL1, PCSK5, ERMP1, MTAP, SPATA6L, S…
UCS	chr19:1-4675277	Deletion	SIRT6	SPPL2B, TBXA2R, MATK, MPND, APBA3, PTBP1, GNA15, CREB3L3, CNN2, ABCA7, SBNO2, HMG20B, AP3D1, WDR18, TLE2, FGF22, FSTL3, RNF126, TCF3, DAZAP1, MBD3, MYDGF, NMRK2, SIRT6, REXO1, GNA11, ANKRD24, SMIM24, EFNA2, CIRBP, ATP5D, C19orf26, TIMM13, CDC34, MISP, POLR2E, POLRMT, HCN2, IZUMO4, GADD45B, PALM, MADCAM1, MKNK2, DOT1L, PLEKHJ1, SF3A2, AMH, OAZ1, TLE6, AES, SGTA, PIAS4, EBI3, CCDC94, SHD, FSD1, ZFR…
UCS	chr7:103965397-159138663	Deletion	TRIM24	CFTR, AOC1, WNT16, TMEM176A, ARF5, ST7, PRKAR2B, KMT2E, KDM7A, AGK, IFRD1, SYPL1, AASS, UBE3C, NUB1, ABCF2, CHPF2, ZNF800, ARHGEF5, KCNH2, CUL1, KMT2C, TBXAS1, PARP12, HIPK2, TNPO3, ING3, BCAP29, CTTNBP2, CNOT4, SLC13A1, CADPS2, SMARCD3, AKR1B1, MRPS33, NDUFB2, PUS7, LAMB4, NRCAM, LAMB1, SLC26A4, SLC26A3, DLD, CPA1, ZC3HC1, NAMPT, PIK3CG, HBP1, DUS4L, WDR91, CBLL1, MTPN, PTN, ATP6V0A4, ZC3HAV1, T…
