# Supplementary material for: Genomic characterization of genes encoding histone acetylation modulator proteins identifies therapeutic targets for cancer treatment
Source: Nat Commun. 2019 Feb 13;10:733. doi: 10.1038/s41467-019-08554-x (PMC6374416; doi:10.1038/s41467-019-08554-x)
Supplement: Supplementary file 10 — Supplementary Data 8 [file 41467_2019_8554_MOESM10_ESM.xlsx]

## Sheet: Supplementary Table 8
Supplementary Data 8. Pan-cancer level overall G-score of HAMPs that recurrently gained or lost copy number in at least one cancer types
HGNC Symbol	Ensembl Gene ID	Overall_Gscore		No. of Cancer Types
		Amplification	Deletion	Amplification	Deletion
KAT6A	ENSG00000083168	1.73772	0	6	0
KAT6B	ENSG00000156650	0.646917	0	1	0
KAT7	ENSG00000136504	0	0	0	0
KAT5	ENSG00000172977	0.177578	0	1	0
KAT8	ENSG00000103510	0.102307	0	1	0
CLOCK	ENSG00000134852	1.2926	0	5	0
HAT1	ENSG00000128708	0	0	0	0
ELP3	ENSG00000134014	0	0.283805	0	2
KAT2A	ENSG00000108773	0	0.195264	0	1
KAT2B	ENSG00000114166	0	0.165405	0	1
TAF1	ENSG00000147133	0	0	0	0
TAF1L	ENSG00000122728	0	0	0	0
ATAT1	ENSG00000137343	0.195732	0	1	0
CREBBP	ENSG00000005339	0	0.334307	0	2
EP300	ENSG00000100393	0.329837	0	1	0
GTF3C4	ENSG00000125484	0	0.391185	0	2
NCOA1	ENSG00000084676	0	0	0	0
NCOA3	ENSG00000124151	0.115099	0	1	0
SP140	ENSG00000079263	0	0.689373	0	3
SP140L	ENSG00000185404	0	1.20396	0	5
SP100	ENSG00000067066	0	1.21565	0	5
SP110	ENSG00000135899	0	1.1945	0	5
TRIM28	ENSG00000130726	0.142797	0.299519	1	1
TRIM33	ENSG00000197323	0	0.655685	0	4
TRIM24	ENSG00000122779	0.326957	0.137265	2	1
TRIM66	ENSG00000166436	0	0	0	0
BAZ1A	ENSG00000198604	0	0	0	0
SMARCA2	ENSG00000080503	0.133406	0	1	0
SMARCA4	ENSG00000127616	0	0	0	0
ASH1L	ENSG00000116539	1.11298	0	4	0
BAZ1B	ENSG00000009954	0.121408	0	1	0
PBRM1	ENSG00000163939	0	0.908142	0	5
ZMYND8	ENSG00000101040	0.327502	0	2	0
ZMYND11	ENSG00000015171	0	0.653791	0	3
BRD4	ENSG00000141867	2.08154	0	6	0
BPTF	ENSG00000171634	0.987701	0	5	0
BRD2	ENSG00000204256	0	0	0	0
BRDT	ENSG00000137948	0	0	0	0
BRD3	ENSG00000169925	0	0.251316	0	1
KMT2A	ENSG00000118058	0	0.642654	0	3
CECR2	ENSG00000099954	0	0.127682	0	1
KIAA2026	ENSG00000183354	0.249952	0.117932	1	1
BRD1	ENSG00000100425	0	1.57072	0	7
BRPF3	ENSG00000096070	0	0	0	0
BRPF1	ENSG00000156983	0	0.364711	0	2
BRD7	ENSG00000166164	0	0.144998	0	1
BRD9	ENSG00000028310	2.81177	0	9	0
BAZ2A	ENSG00000076108	0	0	0	0
BAZ2B	ENSG00000123636	0	0	0	0
ATAD2	ENSG00000156802	1.5408	0	5	0
ATAD2B	ENSG00000119778	0.169238	0	1	0
BRD8	ENSG00000112983	0.284492	0.121192	1	1
BRWD3	ENSG00000165288	0	0	0	0
BRWD1	ENSG00000185658	0.147245	0	1	0
PHIP	ENSG00000146247	0	0.140702	0	1
HDAC1	ENSG00000116478	0	0	0	0
HDAC2	ENSG00000196591	0	0.413855	0	3
HDAC3	ENSG00000171720	0.299241	0.152587	1	1
HDAC8	ENSG00000147099	0	0	0	0
HDAC11	ENSG00000163517	0	0.181057	0	1
HDAC10	ENSG00000100429	0	1.29813	0	6
HDAC6	ENSG00000094631	0	0	0	0
HDAC7	ENSG00000061273	0.160221	0	1	0
HDAC4	ENSG00000068024	0	1.96609	0	8
HDAC5	ENSG00000108840	0	0.50254	0	3
HDAC9	ENSG00000048052	0.112864	0	1	0
SIRT6	ENSG00000077463	0	0.742389	0	1
SIRT3	ENSG00000142082	0	1.32476	0	6
SIRT1	ENSG00000096717	0	0	0	0
SIRT2	ENSG00000068903	0	0	0	0
SIRT7	ENSG00000187531	0.454317	0	2	0
SIRT4	ENSG00000089163	0	0.17142	0	1
SIRT5	ENSG00000124523	0.665012	0.128486	3	1
