# Supplementary material for: Genomic characterization of genes encoding histone acetylation modulator proteins identifies therapeutic targets for cancer treatment
Source: Nat Commun. 2019 Feb 13;10:733. doi: 10.1038/s41467-019-08554-x (PMC6374416; doi:10.1038/s41467-019-08554-x)
Supplement: Supplementary file 11 — Supplementary Data 9 [file 41467_2019_8554_MOESM11_ESM.xlsx]

## Sheet: Supplementary Table 9
Supplementary Data 9. Summary of the M-score of the HAMPs in each cancer type
HGNC Symbol	Ensembl Gene ID	ACC_MScore	BLCA_MScore	BRCA_MScore	CESC_MScore	CHOL_MScore	COAD_MScore	DLBC_MScore	ESCA_MScore	GBM_MScore	HNSC_MScore	KICH_MScore	KIRC_MScore	KIRP_MScore	LAML_MScore	LGG_MScore	LIHC_MScore	LUAD_MScore	LUSC_MScore	MESO_MScore	OV_MScore	PAAD_MScore	PCPG_MScore	PRAD_MScore	READ_MScore	SARC_MScore	SKCM_MScore	STAD_MScore	TGCT_MScore	THCA_MScore	THYM_MScore	UCEC_MScore	UCS_MScore	UVM_MScore
KAT6A	ENSG00000083168	0	0	0	0.0242215	0	0.044335	0	0.0217391	0	0	0	0	0.0213523	0	0	0	0.0246914	0.0371134	0	0	0	0	0.00603622	0	0.00847458	0.0515021	0	0	0	0	0.103774	0	0
KAT6B	ENSG00000156650	0	0	0.0196078	0	0	0	0	0	0	0	0	0	0	0	0	0	0	0	0	0	0	0	0	0.0266667	0	0.0407725	0	0	0.00406504	0	0.0698113	0	0
KAT7	ENSG00000136504	0	0.0875912	0.00392157	0.00346021	0	0.044335	0	0	0	0	0	0	0	0	0	0	0.010582	0.014433	0	0	0	0	0	0	0	0	0	0	0	0	0.192453	0.0175439	0
KAT5	ENSG00000172977	0	0	0	0	0	0.0147783	0	0	0	0	0	0	0	0	0	0	0	0	0	0	0	0	0	0	0	0	0	0	0	0	0	0	0
KAT8	ENSG00000103510	0	0.0145985	0	0	0	0	0	0	0.00508906	0.00394477	0	0	0	0	0	0	0	0	0	0	0	0	0	0	0	0	0.0546697	0	0	0	0.0264151	0	0
CLOCK	ENSG00000134852	0	0.0194647	0	0	0	0	0	0	0	0	0	0	0	0	0	0	0	0	0	0	0	0	0	0	0	0	0	0	0	0	0.0528302	0	0
HAT1	ENSG00000128708	0	0	0.00588235	0	0	0.0147783	0	0	0.00508906	0	0	0	0	0	0	0	0	0.00618557	0	0	0	0.00558659	0	0	0	0	0	0	0	0	0.0358491	0	0
ELP3	ENSG00000134014	0	0	0	0	0	0	0	0	0	0	0	0	0	0	0	0	0	0.00618557	0	0	0.00564972	0	0	0.00666667	0	0.0171674	0	0	0	0	0.0981132	0	0
KAT2A	ENSG00000108773	0	0	0	0	0	0	0	0	0	0	0	0	0	0	0	0	0	0	0	0	0	0	0	0	0	0	0	0	0	0	0	0	0
KAT2B	ENSG00000114166	0	0	0	0	0	0	0	0	0	0	0	0	0	0	0	0	0	0	0	0	0	0	0	0.02	0	0	0	0	0	0	0.198113	0	0
TAF1	ENSG00000147133	0	0	0	0.124567	0	0	0	0	0	0	0	0	0	0	0.00976562	0	0.0405644	0.0453608	0	0	0	0	0	0	0	0.0364807	0.0410023	0	0	0	0.396226	0	0
TAF1L	ENSG00000122728	0.0108696	0	0	0	0	0	0	0	0	0	0	0	0	0	0	0	0.10582	0	0	0	0	0	0	0	0	0.150215	0.0774487	0.00689655	0	0	0	0	0
ATAT1	ENSG00000137343	0	0	0	0	0	0	0	0	0	0	0	0	0	0	0	0	0	0	0	0	0	0	0	0	0	0	0	0	0	0	0	0	0
CREBBP	ENSG00000005339	0	0.486618	0.0411765	0.0795848	0	0.0935961	0.135135	0.0434783	0	0.0571992	0	0	0	0.0283688	0	0.0165289	0.0458554	0.140206	0	0	0	0	0	0.0533333	0	0.0793991	0.0911162	0	0	0	0.241509	0.0526316	0
EP300	ENSG00000100393	0	0.593674	0.0313725	0.605536	0	0.0566502	0.027027	0.0434783	0.0254453	0.299803	0	0.0216802	0	0	0	0.0220386	0.0176367	0.129897	0	0.0194175	0.0225989	0	0.0120724	0	0	0	0.0501139	0	0	0	0.267925	0	0
GTF3C4	ENSG00000125484	0	0.0145985	0	0	0	0	0	0	0	0	0	0	0	0	0	0	0	0	0	0	0	0	0	0.02	0	0.0150215	0	0	0	0	0	0	0
NCOA1	ENSG00000084676	0	0.0486618	0	0	0	0.0394089	0	0.0217391	0.0101781	0.0118343	0	0	0	0	0	0	0	0.0309278	0	0	0	0	0.00201207	0	0.00423729	0.0321888	0.0432802	0	0	0	0.0849057	0	0
NCOA3	ENSG00000124151	0	0.0364964	0	0	0	0	0	0.0108696	0	0	0.0151515	0.0108401	0	0.0141844	0	0	0	0	0	0	0	0	0.00201207	0.0333333	0	0	0	0	0	0	0.0679245	0	0
SP140	ENSG00000079263	0	0	0	0	0	0	0	0	0	0	0	0	0	0	0	0	0	0	0	0	0	0	0	0	0	0	0	0	0.00203252	0	0	0	0
SP140L	ENSG00000185404	0	0	0	0	0	0	0	0	0	0.0197239	0	0	0	0	0	0	0	0	0	0	0	0	0	0	0	0.0515021	0.0136674	0	0	0	0.0641509	0	0
SP100	ENSG00000067066	0	0.0243309	0	0.0553633	0	0	0	0	0	0.00788955	0	0	0	0	0	0	0	0	0	0	0	0	0	0	0	0.0300429	0	0	0	0	0.154717	0	0
SP110	ENSG00000135899	0	0	0	0	0	0	0	0	0	0	0	0	0	0	0	0	0	0	0	0.00485437	0	0	0	0.02	0	0	0	0	0	0	0	0	0
TRIM28	ENSG00000130726	0	0	0.00588235	0	0	0	0	0	0	0	0	0	0	0	0	0.0137741	0	0	0	0	0	0	0	0	0	0	0	0	0	0	0	0	0
TRIM33	ENSG00000197323	0	0.0145985	0	0	0	0.0320197	0	0	0.00508906	0	0	0	0	0	0	0	0.0141093	0	0	0	0	0	0	0	0	0.00643777	0.0273349	0	0	0	0.14717	0	0
TRIM24	ENSG00000122779	0	0	0	0	0	0.0394089	0	0	0.0101781	0	0	0	0	0	0	0	0.015873	0.0185567	0	0	0	0	0	0	0	0.0321888	0.0182232	0	0.00203252	0	0.0509434	0	0
TRIM66	ENSG00000166436	0	0	0	0	0	0	0	0	0	0	0	0	0	0	0	0	0	0	0	0	0	0	0	0	0	0	0	0	0	0	0	0	0
BAZ1A	ENSG00000198604	0	0	0.0107843	0.0207612	0	0	0	0	0	0	0	0	0	0	0	0	0.0176367	0.0329897	0	0	0	0	0	0	0	0.0600858	0	0	0	0	0	0	0
SMARCA2	ENSG00000080503	0	0.111922	0.0127451	0.0207612	0	0.0492611	0	0	0	0	0	0.0108401	0	0	0	0.0165289	0	0	0	0	0	0	0	0	0	0.0429185	0.0615034	0	0	0	0.196226	0	0
SMARCA4	ENSG00000127616	0	0.0559611	0.0147059	0	0	0.118227	0	0.0706522	0	0.086785	0	0	0.0854093	0	0.0488281	0	0.15873	0.0701031	0	0	0	0	0.00402414	0	0	0.0729614	0	0	0	0.0162602	0.0981132	0	0
ASH1L	ENSG00000116539	0	0	0.0264706	0	0	0	0	0	0	0.0236686	0	0	0	0	0	0.0192837	0.0617284	0.0536082	0	0.0121359	0.0112994	0	0	0	0.00847458	0.188841	0.0820046	0	0.00406504	0	0.271698	0	0
BAZ1B	ENSG00000009954	0	0	0.0117647	0.0553633	0	0.0320197	0	0.00543478	0	0.00788955	0	0	0	0	0	0	0.0246914	0.0226804	0	0	0.00564972	0	0.00603622	0.04	0	0.0364807	0.0250569	0	0	0	0	0	0
PBRM1	ENSG00000163939	0	0.0462287	0	0.0207612	0.388889	0.0541872	0.027027	0	0	0	0	0.802168	0.0391459	0	0	0	0.031746	0	0	0	0	0	0	0.02	0	0	0.0592255	0	0	0	0.196226	0	0
ZMYND8	ENSG00000101040	0	0	0.0107843	0.0138408	0	0.0541872	0	0	0	0	0	0	0	0	0	0	0.0246914	0.0164948	0	0.00728155	0	0	0.00402414	0.0266667	0	0.0407725	0	0	0	0	0.0924528	0	0
ZMYND11	ENSG00000015171	0	0.00486618	0.00294118	0.00346021	0	0	0	0	0	0	0	0	0	0	0	0	0	0	0	0	0	0	0	0	0	0.00214592	0	0	0	0	0.0377358	0	0
BRD4	ENSG00000141867	0	0	0.00588235	0.0622837	0	0	0	0	0.0203562	0.0157791	0	0	0	0	0	0	0	0.0206186	0	0	0	0	0	0	0.00847458	0.0579399	0.0341686	0	0	0	0.0735849	0	0
BPTF	ENSG00000171634	0	0.0632603	0.0127451	0	0	0.046798	0	0	0.0152672	0	0	0	0	0	0.00390625	0	0.042328	0.0783505	0	0.0169903	0.0225989	0.00558659	0	0.0266667	0	0.158798	0.0569476	0	0	0	0.173585	0	0
BRD2	ENSG00000204256	0	0	0.00196078	0	0	0.08867	0	0	0.0101781	0	0	0	0	0	0	0	0.0123457	0	0	0.0121359	0.00564972	0	0	0	0	0	0	0	0	0	0	0	0
BRDT	ENSG00000137948	0	0	0	0.0138408	0	0	0	0	0	0.0138067	0	0	0	0	0	0	0	0	0	0	0	0	0	0	0	0	0	0	0	0	0	0	0
BRD3	ENSG00000169925	0	0	0	0	0	0	0	0	0	0	0	0	0	0	0	0	0	0	0	0	0.00564972	0	0	0	0	0	0	0	0	0	0	0	0
KMT2A	ENSG00000118058	0	0.218978	0.0215686	0.0346021	0	0.0763547	0	0.0434783	0.0152672	0.0453649	0	0.0135501	0.0177936	0	0.0078125	0.030303	0.0564374	0.103093	0	0	0	0	0	0.0133333	0	0.111588	0.095672	0	0.0121951	0	0.407547	0	0
CECR2	ENSG00000099954	0	0	0	0	0	0.046798	0	0	0	0	0	0	0	0	0	0	0	0	0	0.00728155	0	0	0	0	0	0	0	0	0	0	0	0	0
KIAA2026	ENSG00000183354	0	0.0364964	0	0	0	0	0	0	0	0	0	0	0	0	0	0	0	0	0	0	0	0	0	0	0	0	0	0	0	0	0.101887	0	0
BRD1	ENSG00000100425	0	0	0	0	0	0.044335	0	0	0	0.00986193	0	0	0	0	0	0	0.0123457	0	0	0	0	0	0	0	0	0.0429185	0	0	0	0	0.283019	0	0
BRPF3	ENSG00000096070	0	0	0.00686275	0.0207612	0	0	0	0	0	0.035503	0	0	0	0	0.00195312	0.00550964	0.0123457	0	0	0	0	0	0	0	0	0.0450644	0	0	0	0	0	0	0
BRPF1	ENSG00000156983	0	0.0389294	0	0.0138408	0	0	0	0	0	0	0	0	0	0	0.00195312	0.0192837	0	0.0103093	0	0	0	0	0	0	0	0	0	0.00689655	0	0	0.0698113	0	0
BRD7	ENSG00000166164	0	0	0.00686275	0	0	0	0	0	0	0	0	0	0	0	0	0.0550964	0	0	0	0	0	0	0	0	0	0.0300429	0	0	0	0	0	0	0
BRD9	ENSG00000028310	0	0	0	0	0	0	0	0	0.00763359	0	0	0	0	0	0	0	0	0	0	0	0	0	0	0	0	0.0214592	0	0	0	0	0.0754717	0	0
BAZ2A	ENSG00000076108	0	0	0.0382353	0	0	0	0	0	0.0101781	0.00986193	0	0	0	0	0	0	0.00881834	0	0	0	0	0	0	0	0	0.0858369	0	0	0	0	0.0735849	0	0
BAZ2B	ENSG00000123636	0	0.0608273	0.0196078	0	0	0	0	0	0	0	0	0	0	0	0	0	0	0	0	0	0	0	0	0.02	0	0.128755	0	0	0	0	0.230189	0	0
ATAD2	ENSG00000156802	0	0.0559611	0	0	0	0	0	0	0	0.0236686	0	0	0	0.0141844	0	0.0247934	0.0899471	0.0474227	0	0.0145631	0	0	0	0	0	0	0	0	0	0	0.211321	0	0
ATAD2B	ENSG00000119778	0	0.0145985	0.0352941	0	0	0	0	0	0.00508906	0.035503	0	0	0	0	0	0	0	0	0	0	0	0	0	0	0	0.0300429	0.0182232	0	0	0	0.322642	0	0
BRD8	ENSG00000112983	0	0.026764	0	0	0	0	0	0	0	0	0	0	0	0	0	0	0	0	0	0	0	0	0	0	0	0	0.0318907	0	0	0	0	0	0
BRWD3	ENSG00000165288	0	0	0	0	0	0	0	0	0	0	0	0	0	0	0	0	0	0.0865979	0	0	0	0	0	0	0	0	0	0	0	0	0.137736	0	0
BRWD1	ENSG00000185658	0	0.0510949	0	0.103806	0	0	0	0	0	0	0	0	0	0	0	0	0	0.0309278	0	0.0145631	0	0	0.0201207	0	0	0.103004	0.0637813	0	0	0	0.115094	0	0
PHIP	ENSG00000146247	0	0	0.0127451	0	0	0.046798	0	0	0.00763359	0	0	0	0	0.0141844	0	0	0	0.0309278	0	0	0	0	0	0	0	0.0772532	0.0387244	0	0	0	0.1	0.0350877	0
HDAC1	ENSG00000116478	0	0	0	0	0	0	0	0	0	0	0	0	0	0	0	0	0.00705467	0	0	0	0	0	0	0	0	0	0	0	0	0	0	0	0
HDAC2	ENSG00000196591	0	0	0	0	0	0.0394089	0	0	0	0	0	0	0	0	0	0	0	0	0	0	0	0	0	0	0	0	0	0	0	0	0.0679245	0	0
HDAC3	ENSG00000171720	0	0	0	0	0	0	0	0	0	0.00788955	0	0	0	0	0	0	0	0	0	0	0	0	0	0	0.00423729	0.0193133	0	0	0	0	0.0528302	0	0
HDAC8	ENSG00000147099	0	0	0	0	0	0	0	0	0	0	0	0	0	0	0	0	0.00176367	0	0	0	0	0	0	0	0	0	0	0	0	0	0.0358491	0	0
HDAC11	ENSG00000163517	0	0	0	0	0	0.0147783	0	0	0	0	0	0	0	0	0	0	0	0	0	0	0	0	0	0	0	0.0171674	0	0	0	0	0	0	0
HDAC10	ENSG00000100429	0	0	0	0	0	0.00985222	0	0	0	0	0	0	0	0	0	0	0	0.0103093	0	0	0	0	0	0	0	0	0	0	0	0	0	0	0
HDAC6	ENSG00000094631	0.0217391	0	0	0	0	0	0	0	0	0	0	0	0	0	0	0	0	0	0	0	0	0	0.00402414	0	0	0	0	0	0	0	0.109434	0	0
HDAC7	ENSG00000061273	0	0	0	0	0	0	0	0	0	0	0	0	0	0	0	0	0.00705467	0	0	0	0	0	0	0	0	0	0	0	0	0	0	0	0
HDAC4	ENSG00000068024	0	0.00729927	0	0	0	0	0	0	0	0	0	0	0	0	0	0	0	0	0	0	0	0	0	0	0	0	0	0	0	0	0.0962264	0	0
HDAC5	ENSG00000108840	0	0	0	0	0	0	0	0.0108696	0	0	0	0	0.0106762	0	0	0.00826446	0	0	0	0	0	0	0	0	0	0.0214592	0	0	0	0	0	0	0
HDAC9	ENSG00000048052	0	0	0	0	0	0	0	0	0	0	0	0	0	0	0	0	0.0811287	0	0	0	0	0	0	0	0	0.257511	0	0	0	0	0.0622642	0	0
SIRT6	ENSG00000077463	0	0	0	0	0	0	0	0	0	0	0	0	0	0	0	0	0.00352734	0	0	0	0	0	0	0	0	0	0	0	0	0	0	0	0
SIRT3	ENSG00000142082	0	0	0	0	0	0.00985222	0	0	0	0	0	0	0	0	0	0	0	0	0	0	0	0	0	0	0	0	0	0	0	0	0	0	0
SIRT1	ENSG00000096717	0	0	0	0	0	0	0	0	0	0	0	0	0	0	0	0	0	0	0	0	0	0	0	0.02	0	0	0	0	0	0	0.0981132	0	0
SIRT2	ENSG00000068903	0	0	0	0	0	0	0	0	0	0	0	0	0	0	0	0	0	0	0	0	0	0	0	0	0	0	0	0	0	0	0.0226415	0.0175439	0
SIRT7	ENSG00000187531	0	0.00973236	0	0	0	0	0	0	0	0	0	0	0	0	0	0	0	0	0	0	0	0	0	0	0	0	0	0	0	0	0	0	0
SIRT4	ENSG00000089163	0	0	0	0	0	0	0	0	0	0	0	0	0	0	0	0	0	0	0	0	0	0	0	0	0	0	0	0	0	0	0	0	0
SIRT5	ENSG00000124523	0	0	0	0	0	0	0	0	0	0	0	0	0	0	0	0	0	0	0	0	0	0	0	0	0	0	0	0	0	0	0	0	0
