# Supplementary material for: Genomic characterization of genes encoding histone acetylation modulator proteins identifies therapeutic targets for cancer treatment
Source: Nat Commun. 2019 Feb 13;10:733. doi: 10.1038/s41467-019-08554-x (PMC6374416; doi:10.1038/s41467-019-08554-x)
Supplement: Supplementary file 12 — Supplementary Data 10 [file 41467_2019_8554_MOESM12_ESM.xlsx]

## Sheet: Supplementary Table 10
Supplementary Data 10. List of the putative cancer-causing HAMPs driven by somatic mutations in each cancer type
HGNC Symbol	Ensembl Gene ID	ACC	BLCA	BRCA	CESC	CHOL	COAD	DLBC	ESCA	GBM	HNSC	KICH	KIRC	KIRP	LAML	LGG	LIHC	LUAD	LUSC	MESO	OV	PAAD	PCPG	PRAD	READ	SARC	SKCM	STAD	TGCT	THCA	THYM	UCEC	UCS	UVM
KAT6A	ENSG00000083168
KAT6B	ENSG00000156650
KAT7	ENSG00000136504		1				1																									1
KAT5	ENSG00000172977
KAT8	ENSG00000103510																											1
CLOCK	ENSG00000134852
HAT1	ENSG00000128708
ELP3	ENSG00000134014																															1
KAT2A	ENSG00000108773
KAT2B	ENSG00000114166																															1
TAF1	ENSG00000147133				1																											1
TAF1L	ENSG00000122728
ATAT1	ENSG00000137343
CREBBP	ENSG00000005339		1	1															1													1
EP300	ENSG00000100393		1	1	1					1	1								1													1
GTF3C4	ENSG00000125484
NCOA1	ENSG00000084676
NCOA3	ENSG00000124151
SP140	ENSG00000079263
SP140L	ENSG00000185404										1
SP100	ENSG00000067066				1																											1
SP110	ENSG00000135899
TRIM28	ENSG00000130726
TRIM33	ENSG00000197323																															1
TRIM24	ENSG00000122779
TRIM66	ENSG00000166436
BAZ1A	ENSG00000198604																										1
SMARCA2	ENSG00000080503		1																													1
SMARCA4	ENSG00000127616						1				1			1				1	1
ASH1L	ENSG00000116539																										1					1
BAZ1B	ENSG00000009954				1
PBRM1	ENSG00000163939					1							1					1														1
ZMYND8	ENSG00000101040
ZMYND11	ENSG00000015171
BRD4	ENSG00000141867				1
BPTF	ENSG00000171634																		1								1					1
BRD2	ENSG00000204256						1
BRDT	ENSG00000137948
BRD3	ENSG00000169925
KMT2A	ENSG00000118058		1																1													1
CECR2	ENSG00000099954
KIAA2026	ENSG00000183354
BRD1	ENSG00000100425																															1
BRPF3	ENSG00000096070										1
BRPF1	ENSG00000156983		1
BRD7	ENSG00000166164																1
BRD9	ENSG00000028310																															1
BAZ2A	ENSG00000076108			1																							1
BAZ2B	ENSG00000123636																										1					1
ATAD2	ENSG00000156802										1							1														1
ATAD2B	ENSG00000119778			1							1																					1
BRD8	ENSG00000112983
BRWD3	ENSG00000165288
BRWD1	ENSG00000185658				1																			1			1
PHIP	ENSG00000146247																										1
HDAC1	ENSG00000116478
HDAC2	ENSG00000196591						1																									1
HDAC3	ENSG00000171720
HDAC8	ENSG00000147099
HDAC11	ENSG00000163517
HDAC10	ENSG00000100429
HDAC6	ENSG00000094631
HDAC7	ENSG00000061273
HDAC4	ENSG00000068024
HDAC5	ENSG00000108840
HDAC9	ENSG00000048052																										1
SIRT6	ENSG00000077463
SIRT3	ENSG00000142082
SIRT1	ENSG00000096717																															1
SIRT2	ENSG00000068903
SIRT7	ENSG00000187531
SIRT4	ENSG00000089163
SIRT5	ENSG00000124523
