# Supplementary material for: Genomic characterization of genes encoding histone acetylation modulator proteins identifies therapeutic targets for cancer treatment
Source: Nat Commun. 2019 Feb 13;10:733. doi: 10.1038/s41467-019-08554-x (PMC6374416; doi:10.1038/s41467-019-08554-x)
Supplement: Supplementary file 13 — Supplementary Data 11 [file 41467_2019_8554_MOESM13_ESM.xlsx]

## Sheet: Supplementary Table 11
Supplementary Data 11. Summary of mutation frequency of the HAMPs in each cancer type
HGNC Symbol	Ensembl Gene ID	ACC_Mut%	BLCA_Mut%	BRCA_Mut%	CESC_Mut%	CHOL_Mut%	COAD_Mut%	DLBC_Mut%	ESCA_Mut%	GBM_Mut%	HNSC_Mut%	KICH_Mut%	KIRC_Mut%	KIRP_Mut%	LAML_Mut%	LGG_Mut%	LIHC_Mut%	LUAD_Mut%	LUSC_Mut%	MESO_Mut%	OV_Mut%	PAAD_Mut%	PCPG_Mut%	PRAD_Mut%	READ_Mut%	SARC_Mut%	SKCM_Mut%	STAD_Mut%	TGCT_Mut%	THCA_Mut%	THYM_Mut%	UCEC_Mut%	UCS_Mut%	UVM_Mut%
KAT6A	ENSG00000083168	1.08696	4.13625	1.27451	2.42215	0	4.4335	2.7027	2.17391	1.01781	1.38067	0	1.89702	2.13523	0.70922	0.390625	1.10193	2.46914	3.71134	0	1.45631	2.25989	0.558659	0.603622	2.66667	0.847458	5.15021	7.51708	0	0.203252	0.813008	10.3774	0	1.25
KAT6B	ENSG00000156650	0	2.43309	1.96078	2.42215	0	4.4335	0	1.08696	1.01781	1.38067	0	0.813008	0.711744	1.41844	2.14844	0.826446	2.46914	2.8866	1.21951	2.18447	1.12994	0	1.00604	2.66667	0	4.07725	4.32802	0	0.406504	0	6.98113	0	0
KAT7	ENSG00000136504	0	2.91971	0.392157	0.346021	0	2.21675	0	0	0.254453	0.591716	1.51515	0.542005	1.06762	0	0.195312	0.275482	1.0582	1.4433	0	0.485437	0	0	0.402414	4	0.423729	0.858369	1.13895	0	0	0	6.41509	1.75439	0
KAT5	ENSG00000172977	0	0.973236	0.0980392	1.03806	0	1.47783	0	0.543478	1.27226	1.18343	0	0.542005	0.355872	0	0.390625	0.550964	0.529101	0.412371	0	0	0.564972	0	0.402414	1.33333	0	0.858369	1.13895	0	0.203252	0	3.77358	0	0
KAT8	ENSG00000103510	0	1.45985	0.294118	0.692042	0	0.985222	0	1.08696	0.508906	0.394477	0	0.271003	0.355872	0	0.195312	0.275482	0.529101	1.03093	0	0.728155	0	0	0	0.666667	0	1.28755	2.73349	0	0.203252	0	2.64151	0	0
CLOCK	ENSG00000134852	0	1.94647	0.686275	1.38408	0	2.21675	0	0	0.508906	0.986193	1.51515	0.271003	0.355872	0.70922	0	0.275482	0.705467	0.824742	0	0.485437	0.564972	0	0.201207	1.33333	0	1.07296	2.05011	0.689655	0	0.813008	5.28302	0	0
HAT1	ENSG00000128708	0	0.729927	0.588235	0.692042	0	1.47783	0	0	0.508906	0.197239	0	0.271003	0.355872	0.70922	0.195312	0	1.0582	0.618557	0	0.728155	0	0.558659	0	0.666667	0	1.07296	0.911162	0	0	0	3.58491	1.75439	1.25
ELP3	ENSG00000134014	0	0.486618	0.0980392	0.692042	0	1.23153	0	0	0	0.197239	0	0.271003	0.355872	0	0	0.550964	0.352734	0.618557	0	0.485437	0.564972	0	0.201207	0.666667	0.423729	1.71674	1.59453	0	0	0	4.90566	0	0
KAT2A	ENSG00000108773	0	1.94647	0.294118	1.7301	0	1.47783	0	1.08696	0	0.197239	0	0.542005	0.355872	0	0.195312	0.275482	1.41093	0.824742	0	0.485437	0.564972	0	0.201207	2	0	1.93133	0.911162	0	0.203252	0	5.28302	0	1.25
KAT2B	ENSG00000114166	0	0.973236	0.588235	0.692042	0	3.20197	2.7027	1.08696	0.763359	0.591716	0	0.271003	0.355872	0.70922	0	0.275482	1.76367	1.4433	1.21951	0	0.564972	0	0.201207	2	0	2.36052	2.2779	0	0	0	6.60377	1.75439	0
TAF1	ENSG00000147133	3.26087	2.18978	2.35294	6.22837	0	4.18719	0	1.63043	1.52672	1.97239	1.51515	1.35501	0.355872	1.41844	0.976562	1.92837	4.05644	4.53608	0	2.42718	1.69492	0.558659	0.402414	2.66667	1.27119	3.64807	4.10023	0	0.203252	0.813008	19.8113	3.50877	0
TAF1L	ENSG00000122728	1.08696	5.3528	2.05882	4.15225	0	8.37438	0	3.80435	4.07125	4.14201	0	1.89702	0.355872	0.70922	0.78125	2.75482	10.582	8.86598	0	2.6699	0.564972	0	1.60966	5.33333	2.11864	15.0215	7.74487	0.689655	0.406504	1.62602	12.0755	1.75439	0
ATAT1	ENSG00000137343	0	0.486618	0.0980392	0.346021	0	1.72414	0	0	0	0.394477	0	0	0	0.70922	0	0	0	0.412371	0	0.485437	0	0	0	1.33333	0	0.643777	0.911162	0	0	0	3.01887	0	0
CREBBP	ENSG00000005339	1.08696	12.1655	2.05882	7.95848	0	9.35961	13.5135	4.34783	1.78117	5.71992	0	0.813008	2.84698	2.83688	0.976562	1.65289	4.58554	7.01031	1.21951	3.39806	1.12994	0	0.804829	5.33333	1.27119	7.93991	9.11162	1.37931	0.203252	0	12.0755	5.26316	0
EP300	ENSG00000100393	1.08696	14.8418	1.56863	12.1107	2.77778	5.66502	2.7027	4.34783	1.27226	7.49507	0	2.16802	2.4911	3.5461	0.195312	2.20386	1.76367	4.3299	1.21951	1.94175	2.25989	0	1.20724	4	0.847458	6.22318	5.01139	0.689655	0	0.813008	13.3962	1.75439	1.25
GTF3C4	ENSG00000125484	1.08696	1.45985	0.588235	0.692042	0	0.738916	0	0	0	0.788955	0	0	0.355872	0	0	0.550964	1.0582	1.03093	0	0.485437	0.564972	0	0	2	0	1.50215	2.73349	0	0	0	5.09434	0	0
NCOA1	ENSG00000084676	2.17391	4.86618	0.882353	1.7301	0	3.94089	0	2.17391	1.01781	1.18343	0	0.271003	1.06762	0	0	0.550964	3.35097	3.09278	0	0.728155	0	0	0.201207	2	0.423729	3.21888	4.32802	0	0	0	8.49057	1.75439	0
NCOA3	ENSG00000124151	0	3.64964	1.37255	1.03806	0	3.20197	0	1.08696	1.01781	1.38067	1.51515	1.08401	0.711744	1.41844	0.585938	1.92837	2.46914	2.06186	0	2.18447	0.564972	0	0.201207	3.33333	0.423729	6.00858	3.41686	0	0.203252	0	6.79245	0	0
SP140	ENSG00000079263	3.26087	3.89294	0.686275	1.38408	0	3.44828	0	0	0.254453	0.986193	0	0.542005	0.355872	0	0.78125	0.826446	3.35097	3.50515	0	0.970874	1.12994	0	0.201207	1.33333	1.27119	10.7296	3.87244	0.689655	0.203252	0	6.03774	0	0
SP140L	ENSG00000185404	0	0.486618	0.0980392	0.346021	2.77778	2.21675	0	1.63043	0	0.986193	0	0.542005	0.711744	0	0	0.275482	1.0582	0.412371	0	0.485437	0.564972	0	0.402414	2.66667	0	5.15021	1.36674	0	0.203252	0	6.41509	0	0
SP100	ENSG00000067066	0	2.43309	0.980392	2.76817	0	1.72414	0	0	1.78117	0.788955	0	0.271003	0	1.41844	0.585938	0	3.35097	1.85567	1.21951	1.45631	0.564972	0	0.402414	1.33333	0	3.00429	4.10023	0.689655	0	0	7.73585	0	0
SP110	ENSG00000135899	0	0.973236	0.490196	0.346021	0	0.985222	0	0	1.27226	0.197239	0	0	0	0	0.195312	0.550964	1.76367	0.618557	0	0.485437	0	0	0.603622	2	0.423729	1.71674	2.05011	0	0	0	5.66038	0	0
TRIM28	ENSG00000130726	0	1.21655	0.588235	1.38408	0	0.738916	0	0	0.763359	0.394477	0	0.542005	0.711744	0	0.390625	1.37741	1.0582	0.824742	1.21951	0	0	0	0.603622	1.33333	0.423729	1.50215	2.05011	0.689655	0.203252	0	5.09434	0	0
TRIM33	ENSG00000197323	1.08696	1.45985	0.588235	0.692042	0	3.20197	0	1.08696	0.508906	0.591716	0	0.542005	1.06762	0.70922	0.195312	0	1.41093	0.824742	0	0.728155	1.12994	0	0.603622	2	0	0.643777	2.73349	0	0.203252	0	7.35849	1.75439	0
TRIM24	ENSG00000122779	0	2.91971	0.980392	1.03806	0	3.94089	2.7027	1.08696	1.01781	0.986193	0	0.813008	0	0	0.195312	0.275482	1.5873	1.85567	0	0.485437	0.564972	0	0	4	0	3.21888	1.82232	0	0.203252	0	5.09434	0	0
TRIM66	ENSG00000166436	0	0	0.294118	1.38408	0	4.4335	0	1.08696	0	0	0	0	0.355872	0	0	2.20386	0	0	1.21951	0	0	0	0	1.33333	0	0	0	0	0	0	6.98113	0	0
BAZ1A	ENSG00000198604	1.08696	2.6764	1.07843	2.07612	0	3.94089	0	0	1.01781	0.986193	0	0.271003	0	0	0.195312	0.550964	1.76367	3.29897	0	0.970874	0	0	0.603622	2	0.423729	3.00429	3.41686	0	0	0	8.11321	0	0
SMARCA2	ENSG00000080503	1.08696	5.59611	1.27451	2.07612	0	4.92611	2.7027	1.63043	1.78117	2.36686	0	1.08401	0.355872	0.70922	0.195312	1.65289	3.7037	2.26804	0	1.45631	0.564972	0	0.603622	2.66667	0.847458	4.29185	6.15034	0	0	0	9.81132	1.75439	0
SMARCA4	ENSG00000127616	1.08696	5.59611	1.47059	2.76817	0	5.91133	2.7027	7.06522	1.78117	4.33925	0	2.98103	4.27046	0.70922	4.88281	3.0303	7.93651	3.50515	1.21951	0.970874	1.12994	0	0.402414	3.33333	0.423729	7.29614	5.69476	0	0.406504	1.62602	9.81132	3.50877	1.25
ASH1L	ENSG00000116539	1.08696	7.29927	2.64706	3.46021	2.77778	9.1133	0	1.08696	1.27226	2.36686	0	0.813008	1.42349	0.70922	0.390625	1.92837	6.17284	5.36082	1.21951	1.21359	1.12994	0.558659	1.20724	6	0.847458	9.44206	8.20046	0	0.406504	0.813008	13.5849	0	0
BAZ1B	ENSG00000009954	0	2.91971	1.17647	2.76817	0	3.20197	0	0.543478	1.01781	0.788955	0	0.542005	1.06762	0	0.390625	0.550964	2.46914	2.26804	0	0.728155	0.564972	0	0.603622	4	0.423729	3.64807	2.50569	0.689655	0	0	6.98113	1.75439	0
PBRM1	ENSG00000163939	1.08696	4.62287	1.07843	2.07612	19.4444	5.41872	2.7027	2.17391	0.763359	2.16963	1.51515	40.1084	3.91459	2.12766	0.976562	1.92837	1.5873	2.26804	2.43902	0.485437	2.82486	0	0.402414	2	1.69492	4.72103	5.92255	0.689655	0	1.62602	9.81132	3.50877	0
ZMYND8	ENSG00000101040	1.08696	4.13625	1.07843	1.38408	0	5.41872	0	0	1.01781	0.986193	0	0.813008	0.355872	0	0	0	2.46914	1.64948	1.21951	0.728155	1.69492	0.558659	0.402414	2.66667	0.423729	4.07725	3.87244	0.689655	0	0	9.24528	1.75439	0
ZMYND11	ENSG00000015171	0	0.486618	0.294118	0.346021	0	2.46305	0	0	0.763359	1.18343	0	0.271003	0.355872	0	0	0.275482	1.41093	0.206186	0	0.242718	0.564972	0	0.201207	0.666667	0.423729	0.214592	2.2779	0	0.203252	0	3.77358	0	0
BRD4	ENSG00000141867	0	2.91971	0.588235	3.11419	0	4.92611	2.7027	2.71739	2.03562	1.57791	0	0.271003	0.711744	0.70922	0	1.65289	1.0582	2.06186	0	0.728155	1.12994	0	0.201207	2	0.847458	5.79399	3.41686	0	0	1.62602	7.35849	0	0
BPTF	ENSG00000171634	0	6.32603	1.27451	3.80623	0	4.6798	2.7027	2.17391	1.52672	1.38067	1.51515	1.08401	1.77936	0	0.390625	2.47934	4.2328	3.91753	0	1.69903	2.25989	0.558659	0.603622	2.66667	0.423729	7.93991	5.69476	0.689655	1.01626	0	8.67925	0	0
BRD2	ENSG00000204256	0	4.37956	0.196078	1.7301	2.77778	2.95567	2.7027	1.08696	1.01781	0.197239	0	0.542005	1.42349	0	0.78125	0.275482	1.23457	1.03093	0	1.21359	0.564972	0	0.201207	1.33333	0.847458	2.57511	3.18907	0	0	0.813008	4.5283	0	0
BRDT	ENSG00000137948	1.08696	2.43309	0.588235	1.38408	2.77778	1.72414	0	0.543478	0.763359	1.38067	0	0.542005	0	0	0.195312	0.826446	3.1746	2.68041	0	0.728155	0.564972	0	0	3.33333	0	6.22318	2.2779	0	0.406504	0	8.11321	1.75439	0
BRD3	ENSG00000169925	2.17391	0	0.294118	0.346021	0	3.20197	2.7027	1.08696	0.763359	0.394477	0	0.271003	0.355872	0	0.78125	0.275482	0.705467	0.412371	0	0.485437	0.564972	0	0.201207	1.33333	0.847458	1.28755	3.87244	0	0.203252	0	6.22642	1.75439	0
KMT2A	ENSG00000118058	4.34783	10.9489	2.15686	3.46021	2.77778	7.63547	5.40541	4.34783	1.52672	4.53649	0	1.35501	1.77936	1.41844	0.78125	3.0303	5.64374	5.15464	1.21951	3.8835	2.25989	0	1.20724	1.33333	1.69492	11.1588	9.5672	0	1.21951	0	13.5849	0	0
CECR2	ENSG00000099954	1.08696	1.70316	1.37255	3.11419	0	4.6798	0	1.63043	1.01781	2.95858	1.51515	0.271003	1.06762	0	0.195312	0.550964	2.29277	2.8866	0	0.728155	1.69492	0	0.603622	3.33333	2.54237	7.51073	4.10023	0.689655	0.203252	0	8.86792	0	0
KIAA2026	ENSG00000183354	0	3.64964	1.17647	3.46021	0	4.92611	0	2.17391	1.27226	1.77515	0	0	0.711744	0.70922	0	1.37741	2.82187	2.68041	0	1.45631	0.564972	0	0.804829	4	0.423729	1.93133	2.73349	0	0	0	10.1887	1.75439	0
BRD1	ENSG00000100425	1.08696	1.45985	0.392157	1.7301	0	4.4335	0	1.08696	1.01781	0.986193	1.51515	0.813008	0.711744	0	0.585938	0.275482	1.23457	0.824742	0	1.21359	0.564972	0.558659	0.402414	2.66667	0	4.29185	4.7836	0	0	0.813008	9.43396	1.75439	0
BRPF3	ENSG00000096070	1.08696	2.18978	0.686275	2.07612	0	4.4335	0	0.543478	1.78117	1.77515	0	1.35501	0.355872	0	0.195312	0.550964	1.23457	2.26804	0	0.728155	0.564972	0	0.201207	1.33333	0	4.50644	2.05011	0	0	0	5.28302	0	0
BRPF1	ENSG00000156983	1.08696	1.94647	0.686275	1.38408	0	3.44828	0	0.543478	0.508906	0.986193	0	0.271003	0.355872	0	0.195312	1.92837	0.705467	1.03093	0	0.485437	0.564972	0	1.20724	2	0	3.43348	3.18907	0.689655	0	0	6.98113	3.50877	0
BRD7	ENSG00000166164	1.08696	2.43309	0.686275	1.7301	2.77778	2.21675	0	0.543478	0.508906	0.197239	0	1.08401	0	0	0	2.75482	0.529101	1.23711	1.21951	0.242718	0	0	0	1.33333	0.423729	3.00429	1.59453	0	0.203252	0.813008	4.71698	1.75439	0
BRD9	ENSG00000028310	0	0.973236	0.294118	0.346021	0	1.97044	0	1.08696	0.763359	0.986193	0	0	0	0	0	1.10193	0.881834	0.618557	0	0.485437	0	0	0.201207	0.666667	0	2.14592	0.911162	0	0	0	3.77358	0	0
BAZ2A	ENSG00000076108	1.08696	3.89294	1.27451	2.07612	0	3.94089	2.7027	2.71739	1.01781	0.986193	0	0.271003	1.42349	0	0.390625	1.65289	0.881834	2.26804	1.21951	0.242718	0.564972	0.558659	0	2	0.847458	4.29185	3.64465	0.689655	0	0	7.35849	0	1.25
BAZ2B	ENSG00000123636	2.17391	6.08273	1.96078	2.42215	0	4.18719	2.7027	3.26087	1.78117	3.35306	0	2.16802	1.06762	2.83688	0.390625	2.75482	4.40917	5.36082	2.43902	0.970874	0.564972	0	0.804829	2	0.847458	6.43777	4.55581	0	0	0	11.5094	1.75439	0
ATAD2	ENSG00000156802	0	5.59611	1.07843	3.11419	0	3.94089	0	2.71739	1.01781	1.18343	0	0.813008	0	1.41844	0.585938	2.47934	2.99824	4.74227	0	1.45631	0.564972	0	0.402414	2.66667	0.847458	4.07725	5.23918	0.689655	0.406504	0	10.566	3.50877	0
ATAD2B	ENSG00000119778	1.08696	1.45985	1.76471	1.7301	2.77778	3.69458	0	1.08696	0.508906	1.77515	0	0.813008	1.06762	0	0	1.37741	1.0582	2.06186	0	0.485437	1.69492	0	0.201207	4.66667	1.27119	3.00429	1.82232	0.689655	0	0	10.7547	1.75439	1.25
BRD8	ENSG00000112983	0	2.6764	0.686275	1.38408	0	3.69458	0	1.63043	0.763359	1.77515	0	1.08401	1.42349	0	0.195312	1.10193	1.76367	2.26804	0	0.970874	0	0	0	2	0.847458	3.43348	3.18907	0	0	0	5.4717	1.75439	0
BRWD3	ENSG00000165288	2.17391	1.94647	1.86275	5.88235	2.77778	8.12808	2.7027	1.63043	2.03562	4.14201	0	1.35501	0.355872	0	0.390625	1.10193	7.05467	8.65979	1.21951	1.94175	2.25989	0.558659	0.201207	3.33333	0.847458	5.15021	5.01139	0.689655	0.203252	0.813008	13.7736	1.75439	0
BRWD1	ENSG00000185658	1.08696	5.10949	2.15686	5.19031	2.77778	5.17241	0	1.08696	1.01781	2.16963	0	1.35501	1.77936	4.25532	0.78125	1.37741	1.94004	3.09278	1.21951	1.45631	1.69492	0	1.00604	4	0.423729	5.15021	6.37813	0	0.203252	0	11.5094	7.01754	0
PHIP	ENSG00000146247	0	2.18978	1.27451	1.38408	2.77778	4.6798	0	1.63043	0.763359	2.5641	1.51515	0.271003	1.06762	1.41844	0.78125	1.92837	1.94004	3.09278	0	0.728155	1.69492	0.558659	0.603622	5.33333	0	3.86266	3.87244	0	0.203252	0.813008	10	3.50877	0
HDAC1	ENSG00000116478	1.08696	0.973236	0.882353	0	0	1.23153	0	0	0.763359	0.197239	0	0.271003	0	0	0	0.275482	0.705467	0.618557	1.21951	0.728155	0	0	0.201207	1.33333	0	0.643777	1.13895	0	0	0	2.26415	0	0
HDAC2	ENSG00000196591	0	0.729927	0.294118	0.692042	0	1.97044	2.7027	0	0.763359	0.591716	0	0	0	0.70922	0.78125	0.826446	1.23457	0.412371	0	0	0	0.558659	0.402414	1.33333	0	0.429185	0.911162	0	0	0	3.39623	0	0
HDAC3	ENSG00000171720	0	0.243309	0.392157	1.7301	0	0.985222	0	1.08696	0.508906	0.788955	0	0	0	0.70922	0.195312	0.275482	0.529101	0.412371	0	0.485437	0	0	0.402414	0.666667	0.423729	1.93133	1.82232	0	0	0	5.28302	0	0
HDAC8	ENSG00000147099	0	0.729927	0.588235	1.7301	0	1.23153	2.7027	0	0.508906	0.197239	0	0	0.711744	0	0	0.275482	0.176367	0.412371	0	0.728155	0	0	0.201207	1.33333	0	1.07296	0.683371	0	0.203252	0	3.58491	1.75439	0
HDAC11	ENSG00000163517	0	1.21655	0.196078	0.692042	0	1.47783	0	0.543478	0	0.591716	1.51515	0	0.355872	0	0.195312	0.275482	0.705467	0	0	0.728155	0	0	0	0	0	1.71674	2.05011	0	0	0	3.58491	0	0
HDAC10	ENSG00000100429	0	0.729927	0.196078	0.346021	0	0.985222	0	0	0	0.788955	0	0.271003	0.355872	0	0.390625	0	0.529101	1.03093	0	0	0	0	0.201207	0.666667	0	0.858369	1.13895	0.689655	0	0	3.77358	1.75439	0
HDAC6	ENSG00000094631	2.17391	1.94647	1.27451	2.42215	0	2.70936	0	1.63043	0.763359	1.18343	0	0.542005	0.711744	0	0.585938	0.826446	2.29277	1.85567	0	1.21359	0.564972	0	0.402414	1.33333	0.847458	1.07296	2.05011	0	0	0	10.9434	3.50877	0
HDAC7	ENSG00000061273	1.08696	0.486618	0.0980392	1.38408	0	2.21675	0	0	0.254453	1.18343	1.51515	0.271003	0.711744	0	0.195312	0.275482	0.705467	0.824742	0	0.485437	0.564972	0	0.201207	1.33333	0.847458	1.93133	3.41686	0	0	0	3.96226	3.50877	0
HDAC4	ENSG00000068024	1.08696	0.729927	0.686275	1.03806	0	4.4335	0	3.26087	1.01781	1.77515	0	0.271003	0	0.70922	0.78125	1.65289	3.1746	3.09278	0	0.970874	0.564972	0	0.201207	0	0	2.7897	5.69476	0	0	0	9.62264	0	0
HDAC5	ENSG00000108840	0	1.21655	0.588235	2.07612	0	3.20197	0	1.08696	1.01781	0.394477	1.51515	0	1.06762	0	0.195312	0.826446	0.529101	0.618557	0	0	1.12994	0	0.804829	0.666667	0.423729	2.14592	2.50569	0	0	0	5.84906	0	2.5
HDAC9	ENSG00000048052	1.08696	1.70316	0.490196	1.7301	2.77778	5.91133	2.7027	4.34783	1.27226	3.15582	1.51515	0.813008	0.355872	0	0.195312	2.47934	8.11287	5.97938	0	0.728155	1.69492	0	0.402414	5.33333	0.423729	12.8755	2.73349	0	0	0	6.22642	0	0
SIRT6	ENSG00000077463	0	0.486618	0.294118	0.346021	0	1.23153	0	0.543478	0	0	0	0.542005	0	0.70922	0	0	0.352734	0.824742	0	0	0	0	0	0	0	0.429185	0.455581	0	0	0	0.943396	0	0
SIRT3	ENSG00000142082	0	0.486618	0.196078	0.346021	0	0.985222	0	0.543478	0.508906	0.394477	1.51515	0	0	0	0.390625	0.275482	0.352734	0.412371	0	0.242718	0	0	0.201207	0	0.847458	0.429185	0	0	0	0	2.26415	0	0
SIRT1	ENSG00000096717	1.08696	2.18978	0.392157	0.692042	0	1.97044	0	0.543478	0.254453	0.394477	0	0.813008	0	0.70922	0.195312	0.275482	0.352734	0.412371	0	0.242718	0.564972	0	0.603622	2	0.423729	0.643777	1.82232	0	0	0	4.90566	1.75439	0
SIRT2	ENSG00000068903	0	0.486618	0.294118	0.692042	0	0.246305	0	0	0.508906	0.197239	0	0	0	0.70922	0	0.550964	0.352734	1.4433	0	0.242718	0	0	0.201207	0.666667	0.423729	0.429185	0.683371	0	0	0	2.26415	1.75439	0
SIRT7	ENSG00000187531	0	0.973236	0.294118	0.692042	0	0.985222	0	0.543478	0.508906	0.197239	0	0.813008	0.711744	0	0.195312	0	0.705467	0.618557	0	0	0	0	0	0	0.423729	0.643777	0.911162	0	0	0	1.88679	0	0
SIRT4	ENSG00000089163	0	0.243309	0.0980392	0.346021	0	1.47783	2.7027	0	0.508906	0.394477	0	0.271003	0	0	0.195312	0.275482	0.529101	0.618557	0	0.242718	0	0	0.201207	0.666667	0	0.858369	0.455581	0	0.203252	0	3.01887	0	0
SIRT5	ENSG00000124523	0	0.729927	0.0980392	1.03806	0	0.985222	0	0	0.254453	0.394477	0	0	0	0	0.390625	0	0.176367	0.206186	0	0.242718	0	0	0	0.666667	0	1.28755	0.911162	0.689655	0	0	3.77358	0	0
