# Supplementary material for: Genomic characterization of genes encoding histone acetylation modulator proteins identifies therapeutic targets for cancer treatment
Source: Nat Commun. 2019 Feb 13;10:733. doi: 10.1038/s41467-019-08554-x (PMC6374416; doi:10.1038/s41467-019-08554-x)
Supplement: Supplementary file 14 — Supplementary Data 12 [file 41467_2019_8554_MOESM14_ESM.xlsx]

## Sheet: Supplementary Table 12
Supplementary Data 12. Pan-cancer level overall M-score of HAMPs
HGNC Symbol	Ensembl Gene ID	Overall_Mscore	No. of Cancer Types
KAT6A	ENSG00000083168	0	0
KAT6B	ENSG00000156650	0	0
KAT7	ENSG00000136504	0.324379	3
KAT5	ENSG00000172977	0	0
KAT8	ENSG00000103510	0.0546697	1
CLOCK	ENSG00000134852	0	0
HAT1	ENSG00000128708	0	0
ELP3	ENSG00000134014	0.0981132	1
KAT2A	ENSG00000108773	0	0
KAT2B	ENSG00000114166	0.198113	1
TAF1	ENSG00000147133	0.520794	2
TAF1L	ENSG00000122728	0	0
ATAT1	ENSG00000137343	0	0
CREBBP	ENSG00000005339	0.90951	4
EP300	ENSG00000100393	1.95365	7
GTF3C4	ENSG00000125484	0	0
NCOA1	ENSG00000084676	0	0
NCOA3	ENSG00000124151	0	0
SP140	ENSG00000079263	0	0
SP140L	ENSG00000185404	0.0197239	1
SP100	ENSG00000067066	0.21008	2
SP110	ENSG00000135899	0	0
TRIM28	ENSG00000130726	0	0
TRIM33	ENSG00000197323	0.14717	1
TRIM24	ENSG00000122779	0	0
TRIM66	ENSG00000166436	0	0
BAZ1A	ENSG00000198604	0.0600858	1
SMARCA2	ENSG00000080503	0.308149	2
SMARCA4	ENSG00000127616	0.519254	5
ASH1L	ENSG00000116539	0.460539	2
BAZ1B	ENSG00000009954	0.0553633	1
PBRM1	ENSG00000163939	1.41903	4
ZMYND8	ENSG00000101040	0	0
ZMYND11	ENSG00000015171	0	0
BRD4	ENSG00000141867	0.0622837	1
BPTF	ENSG00000171634	0.410734	3
BRD2	ENSG00000204256	0.08867	1
BRDT	ENSG00000137948	0	0
BRD3	ENSG00000169925	0	0
KMT2A	ENSG00000118058	0.729618	3
CECR2	ENSG00000099954	0	0
KIAA2026	ENSG00000183354	0	0
BRD1	ENSG00000100425	0.283019	1
BRPF3	ENSG00000096070	0.035503	1
BRPF1	ENSG00000156983	0.0389294	1
BRD7	ENSG00000166164	0.0550964	1
BRD9	ENSG00000028310	0.0754717	1
BAZ2A	ENSG00000076108	0.124072	2
BAZ2B	ENSG00000123636	0.358944	2
ATAD2	ENSG00000156802	0.324936	3
ATAD2B	ENSG00000119778	0.393439	3
BRD8	ENSG00000112983	0	0
BRWD3	ENSG00000165288	0	0
BRWD1	ENSG00000185658	0.226931	3
PHIP	ENSG00000146247	0.0772532	1
HDAC1	ENSG00000116478	0	0
HDAC2	ENSG00000196591	0.107333	2
HDAC3	ENSG00000171720	0	0
HDAC8	ENSG00000147099	0	0
HDAC11	ENSG00000163517	0	0
HDAC10	ENSG00000100429	0	0
HDAC6	ENSG00000094631	0	0
HDAC7	ENSG00000061273	0	0
HDAC4	ENSG00000068024	0	0
HDAC5	ENSG00000108840	0	0
HDAC9	ENSG00000048052	0.257511	1
SIRT6	ENSG00000077463	0	0
SIRT3	ENSG00000142082	0	0
SIRT1	ENSG00000096717	0.0981132	1
SIRT2	ENSG00000068903	0	0
SIRT7	ENSG00000187531	0	0
SIRT4	ENSG00000089163	0	0
SIRT5	ENSG00000124523	0	0
