# Supplementary material for: Genomic characterization of genes encoding histone acetylation modulator proteins identifies therapeutic targets for cancer treatment
Source: Nat Commun. 2019 Feb 13;10:733. doi: 10.1038/s41467-019-08554-x (PMC6374416; doi:10.1038/s41467-019-08554-x)
Supplement: Supplementary file 15 — Supplementary Data 13 [file 41467_2019_8554_MOESM15_ESM.xlsx]

## Sheet: Supplementary Table 13
Supplementary Data 13. Summary of the mutation categories of the HAMPs in each cancer type
HGNC Symbol	Ensembl Gene ID	ACC				BLCA				BRCA				CESC				CHOL				COAD				DLBC				ESCA				GBM				HNSC				KICH				KIRC
		In-frame (%)	Missense (%)	Truncating (%)	Silent (%)	In-frame (%)	Missense (%)	Truncating (%)	Silent (%)	In-frame (%)	Missense (%)	Truncating (%)	Silent (%)	In-frame (%)	Missense (%)	Truncating (%)	Silent (%)	In-frame (%)	Missense (%)	Truncating (%)	Silent (%)	In-frame (%)	Missense (%)	Truncating (%)	Silent (%)	In-frame (%)	Missense (%)	Truncating (%)	Silent (%)	In-frame (%)	Missense (%)	Truncating (%)	Silent (%)	In-frame (%)	Missense (%)	Truncating (%)	Silent (%)	In-frame (%)	Missense (%)	Truncating (%)	Silent (%)	In-frame (%)	Missense (%)	Truncating (%)	Silent (%)	In-frame (%)	Missense (%)	Truncating (%)	Silent (%)
KAT6A	ENSG00000083168	0	1	0	0	0	0.75	0.15	0.1	0.0625	0.6875	0.1875	0.0625	0	0.777778	0	0.222222	0	0	0	0	0.0344828	0.655172	0.0344828	0.275862	0	1	0	0	0	0.8	0	0.2	0	0.857143	0	0.142857	0	0.583333	0	0.416667	0	0	0	1	0	0.857143	0.142857	0
KAT6B	ENSG00000156650	0	0	0	0	0	0.647059	0	0.352941	0.0416667	0.708333	0.125	0.125	0	0.571429	0.0714286	0.357143	0	0	0	0	0.04	0.56	0.2	0.2	0	0	0	0	0	0.666667	0	0.333333	0	0.666667	0.25	0.0833333	0	0.666667	0.111111	0.222222	0	0	0	0	0	0.75	0	0.25
KAT7	ENSG00000136504	0	0	0	0	0	0.6	0.2	0.2	0	1	0	0	0	1	0	0	0	0	0	0	0	0.777778	0.222222	0	0	0	0	0	0	0	0	0	0	1	0	0	0	0.6	0	0.4	0	1	0	0	0	1	0	0
KAT5	ENSG00000172977	0	0	0	1	0	0.833333	0	0.166667	0	0.333333	0	0.666667	0	0.666667	0	0.333333	0	0	0	0	0	0.625	0.25	0.125	0	0	0	0	0	0.5	0	0.5	0	0.833333	0	0.166667	0.142857	0.714286	0	0.142857	0	0	0	0	0	0.5	0.5	0
KAT8	ENSG00000103510	0	0	0	0	0	0.857143	0	0.142857	0.333333	0.666667	0	0	0	1	0	0	0	0	0	0	0	0.5	0.166667	0.333333	0	0	0	0	0	1	0	0	0	0.666667	0	0.333333	0	1	0	0	0	0	0	0	0	0.5	0	0.5
CLOCK	ENSG00000134852	0	0	0	0	0	0.666667	0.222222	0.111111	0	0.5	0.375	0.125	0	0.8	0	0.2	0	0	0	0	0	0.571429	0.285714	0.142857	0	0	0	0	0	0	0	0	0	0.6	0	0.4	0	0.666667	0.166667	0.166667	0	0	1	0	0	0	1	0
HAT1	ENSG00000128708	0	0	0	0	0	0.8	0	0.2	0	0.333333	0.666667	0	0	1	0	0	0	0	0	0	0	0.75	0.125	0.125	0	0	0	0	0	0	0	0	0	0.25	0.5	0.25	0	1	0	0	0	0	0	0	0	1	0	0
ELP3	ENSG00000134014	0	0	0	0	0	0.5	0	0.5	0	0.333333	0	0.666667	0	0.666667	0	0.333333	0	0	0	0	0	0.333333	0.222222	0.444444	0	0	0	0	0	0	0	1	0	0	0	1	0	0.25	0	0.75	0	0	0	0	0	1	0	0
KAT2A	ENSG00000108773	0	0	0	0	0	0.777778	0.111111	0.111111	0	0.4	0.2	0.4	0	0.5	0.125	0.375	0	0	0	0	0	0.4	0.2	0.4	0	0	0	1	0.5	0.5	0	0	0	0	0	0	0	0.333333	0	0.666667	0	0	0	0	0	1	0	0
KAT2B	ENSG00000114166	0	0	0	0	0	0.333333	0	0.666667	0	0.444444	0.222222	0.333333	0	1	0	0	0	0	0	0	0.0526316	0.578947	0.263158	0.105263	0	0.333333	0	0.666667	0	0.666667	0	0.333333	0	0.75	0	0.25	0	0.6	0	0.4	0	0	0	0	0	0.5	0	0.5
TAF1	ENSG00000147133	0	0.75	0.25	0	0	0.692308	0	0.307692	0.0344828	0.724138	0.103448	0.137931	0	0.92	0	0.08	0	0	0	0	0	0.809524	0.0952381	0.0952381	0	0	0	0	0	1	0	0	0	0.5	0.0833333	0.416667	0	0.785714	0	0.214286	0	1	0	0	0	0.714286	0	0.285714
TAF1L	ENSG00000122728	0	0.5	0	0.5	0	0.807692	0.115385	0.0769231	0	0.689655	0.103448	0.206897	0	1	0	0	0	0	0	0	0	0.705882	0.117647	0.176471	0	0	0	0	0	0.875	0	0.125	0	0.777778	0.0740741	0.148148	0	0.709677	0	0.290323	0	0	0	0	0	0.888889	0	0.111111
ATAT1	ENSG00000137343	0	0	0	0	0	0.166667	0.166667	0.666667	0	0	0.5	0.5	0	1	0	0	0	0	0	0	0	0.555556	0.333333	0.111111	0	0	0	0	0	0	0	0	0	0	0	0	0	0.5	0.5	0	0	0	0	0	0	0	0	0
CREBBP	ENSG00000005339	0	1	0	0	0.0166667	0.416667	0.45	0.116667	0	0.5625	0.375	0.0625	0.030303	0.575758	0.181818	0.212121	0	0	0	0	0	0.606061	0.151515	0.242424	0.2	0.8	0	0	0	0.454545	0.363636	0.181818	0	0.75	0.0833333	0.166667	0.0238095	0.619048	0.166667	0.190476	0	0	0	0	0	1	0	0
EP300	ENSG00000100393	1	0	0	0	0.0119048	0.571429	0.333333	0.0833333	0	0.45	0.4	0.15	0	0.489796	0.44898	0.0612245	0	1	0	0	0	0.578947	0.184211	0.236842	0	1	0	0	0.111111	0.555556	0.222222	0.111111	0	0.642857	0.0714286	0.285714	0.0263158	0.736842	0.236842	0	0	0	0	0	0	0.666667	0.222222	0.111111
GTF3C4	ENSG00000125484	0	1	0	0	0	0.666667	0	0.333333	0	1	0	0	0	0.333333	0	0.666667	0	0	0	0	0	0.5	0.25	0.25	0	0	0	0	0	0	0	0	0	0	0	1	0	0.428571	0.142857	0.428571	0	0	0	1	0	0	0	0
NCOA1	ENSG00000084676	0	1	0	0	0	0.807692	0.115385	0.0769231	0	0.8	0.2	0	0	0.888889	0	0.111111	0	0	0	0	0	0.7	0.1	0.2	0	0	0	0	0	0.75	0.25	0	0	0.833333	0	0.166667	0	0.6	0	0.4	0	0	0	0	0	1	0	0
NCOA3	ENSG00000124151	0	0	0	0	0	0.545455	0.272727	0.181818	0	0.705882	0.176471	0.117647	0	1	0	0	0	0	0	0	0.0625	0.6875	0.125	0.125	0	0	0	1	0	0.333333	0.333333	0.333333	0	0.714286	0	0.285714	0	0.777778	0	0.222222	0	1	0	0	0	0.75	0.25	0
SP140	ENSG00000079263	0	1	0	0	0	0.736842	0.157895	0.105263	0	0.555556	0.222222	0.222222	0	0.5	0.166667	0.333333	0	0	0	0	0	0.571429	0.190476	0.238095	0	0	0	0	0	0	0	0	0	0.5	0	0.5	0	0.714286	0	0.285714	0	0	0	0	0	1	0	0
SP140L	ENSG00000185404	0	0	0	0	0	1	0	0	0	0.5	0	0.5	0	1	0	0	0	0	1	0	0	0.636364	0.181818	0.181818	0	0	0	0	0	1	0	0	0	0	0	0	0	1	0	0	0	0	0	0	0	1	0	0
SP100	ENSG00000067066	0	0	0	0	0	0.833333	0	0.166667	0	0.636364	0.272727	0.0909091	0	0.785714	0.0714286	0.142857	0	0	0	0	0	0.857143	0.142857	0	0	0	0	0	0	0	0	0	0	0.625	0.25	0.125	0	1	0	0	0	0	0	0	0	1	0	0
SP110	ENSG00000135899	0	0	0	0	0	0.25	0.25	0.5	0	0.4	0.4	0.2	0	0	1	0	0	0	0	0	0	0.333333	0.111111	0.555556	0	0	0	0	0	0	0	1	0	0.714286	0.142857	0.142857	0	0.333333	0	0.666667	0	0	0	0	0	0	0	0
TRIM28	ENSG00000130726	0	0	0	0	0	0.666667	0.166667	0.166667	0	0.5	0.2	0.3	0	0.8	0	0.2	0	0	0	0	0	0.4	0.2	0.4	0	0	0	0	0	0	0	0	0	0.833333	0	0.166667	0	1	0	0	0	0	0	0	0	0.666667	0	0.333333
TRIM33	ENSG00000197323	0	0	1	0	0	0.666667	0	0.333333	0	0.4	0.2	0.4	0	0.666667	0	0.333333	0	0	0	0	0	0.578947	0.157895	0.263158	0	0	0	0	0	0.666667	0	0.333333	0	1	0	0	0	1	0	0	0	0	0	0	0	0.5	0.5	0
TRIM24	ENSG00000122779	0	0	0	0	0	0.8125	0	0.1875	0	0.583333	0.25	0.166667	0	0.5	0.25	0.25	0	0	0	0	0	0.6	0.35	0.05	0	1	0	0	0	0.5	0	0.5	0	0.75	0.25	0	0	0.5	0.25	0.25	0	0	0	0	0	1	0	0
TRIM66	ENSG00000166436	0	0	0	0	0	0	0	0	0	0.5	0.125	0.375	0	0.625	0.125	0.25	0	0	0	0	0	0.652174	0.26087	0.0869565	0	0	0	1	0	1	0	0	0	0	0	0	0	0	0	0	0	0	0	0	0	0	0	0
BAZ1A	ENSG00000198604	0	1	0	0	0	0.571429	0.214286	0.214286	0	0.692308	0.153846	0.153846	0	0.875	0.125	0	0	0	0	0	0	0.434783	0.434783	0.130435	0	0	0	1	0	0	0	0	0	0.666667	0	0.333333	0	0.5	0.333333	0.166667	0	0	0	0	0	0.5	0	0.5
SMARCA2	ENSG00000080503	0	1	0	0	0	0.884615	0	0.115385	0.0625	0.5625	0.25	0.125	0	0.727273	0.0909091	0.181818	0	0	0	0	0	0.69697	0.0909091	0.212121	0	0.5	0	0.5	0	1	0	0	0	0.846154	0	0.153846	0	0.846154	0.0769231	0.0769231	0	0	0	1	0	0.5	0.5	0
SMARCA4	ENSG00000127616	0	0.5	0	0.5	0	0.774194	0.0645161	0.16129	0.0555556	0.444444	0.333333	0.166667	0	0.5	0.05	0.45	0	0	0	0	0	0.65	0.075	0.275	0	1	0	0	0	0.857143	0.0714286	0.0714286	0	0.785714	0	0.214286	0	0.785714	0.0714286	0.142857	0	0	0	0	0	0.75	0.166667	0.0833333
ASH1L	ENSG00000116539	0	0.5	0	0.5	0	0.794872	0.128205	0.0769231	0.0277778	0.555556	0.25	0.166667	0	0.789474	0.0526316	0.157895	0	1	0	0	0	0.629032	0.193548	0.177419	0	0	0	0	0	0.666667	0	0.333333	0	0.571429	0.142857	0.285714	0	0.842105	0.105263	0.0526316	0	0	0	0	0	0.5	0	0.5
BAZ1B	ENSG00000009954	0	0	0	0	0	0.6875	0.0625	0.25	0	0.555556	0.277778	0.166667	0.0588235	0.823529	0	0.117647	0	0	0	0	0.0952381	0.428571	0.142857	0.333333	0	0	0	0	0	0.5	0	0.5	0	0.857143	0.142857	0	0	0.6	0.2	0.2	0	0	0	0	0	0.5	0	0.5
PBRM1	ENSG00000163939	0	0.5	0	0.5	0	0.730769	0.115385	0.153846	0	0.466667	0.266667	0.266667	0	0.454545	0.181818	0.363636	0.142857	0	0.857143	0	0	0.518519	0.444444	0.037037	0	1	0	0	0	0.5	0.5	0	0	0.666667	0.333333	0	0	0.615385	0.230769	0.153846	0	1	0	0	0.0129032	0.141935	0.83871	0.00645161
ZMYND8	ENSG00000101040	0	0.5	0	0.5	0	0.590909	0.227273	0.181818	0	0.6875	0.1875	0.125	0	1	0	0	0	0	0	0	0	0.740741	0.111111	0.148148	0	0	0	0	0	0	0	1	0	0.5	0.166667	0.333333	0	0.555556	0	0.444444	0	0	0	0	0	0.75	0	0.25
ZMYND11	ENSG00000015171	0	0	0	0	0	0.666667	0	0.333333	0	0.75	0.25	0	0	1	0	0	0	0	0	0	0	0.692308	0.0769231	0.230769	0	0	0	0	0	0	0	1	0	0.8	0	0.2	0	0.75	0	0.25	0	0	0	0	0	0.5	0	0.5
BRD4	ENSG00000141867	0	0	0	1	0	0.705882	0.0588235	0.235294	0	0.5	0.375	0.125	0	0.833333	0.0833333	0.0833333	0	0	0	0	0	0.678571	0.107143	0.214286	0	1	0	0	0	1	0	0	0	0.785714	0.0714286	0.142857	0.0833333	0.5	0.0833333	0.333333	0	0	0	0	0.5	0.5	0	0
BPTF	ENSG00000171634	0	0	0	1	0	0.694444	0.0833333	0.222222	0	0.705882	0.0588235	0.235294	0	0.846154	0.0769231	0.0769231	0	0	0	0	0.0344828	0.689655	0.137931	0.137931	0	0	1	0	0.25	0.5	0.25	0	0	0.538462	0.153846	0.307692	0	0.857143	0.142857	0	0	0.5	0	0.5	0	0.8	0.2	0
BRD2	ENSG00000204256	0	0	0	0	0	0.666667	0.125	0.208333	0	0.5	0.5	0	0	0.833333	0	0.166667	0	0	1	0	0.0625	0.5625	0.1875	0.1875	0	0	1	0	0	0.5	0.5	0	0	0.5	0.166667	0.333333	0	0	0.5	0.5	0	0	0	0	0	0.666667	0	0.333333
BRDT	ENSG00000137948	0	0	1	0	0	0.75	0.166667	0.0833333	0	0.714286	0.142857	0.142857	0	0.75	0.25	0	0	1	0	0	0	0.733333	0.133333	0.133333	0	0	0	0	0	1	0	0	0	0.75	0	0.25	0	0.666667	0.111111	0.222222	0	0	0	0	0	0	0.5	0.5
BRD3	ENSG00000169925	0	1	0	0	0	0	0	1	0	0.5	0.25	0.25	0	0.5	0	0.5	0	0	0	0	0.0526316	0.526316	0.157895	0.263158	0	1	0	0	0	0.5	0.5	0	0	1	0	0	0	0.75	0	0.25	0	0	0	0	0	1	0	0
KMT2A	ENSG00000118058	0	0.75	0.25	0	0	0.457143	0.385714	0.157143	0	0.393939	0.424242	0.181818	0	0.684211	0.0526316	0.263158	0	1	0	0	0	0.625	0.196429	0.178571	0	1	0	0	0	0.777778	0.222222	0	0	0.529412	0.0588235	0.411765	0.0344828	0.551724	0.206897	0.206897	0	0	0	0	0	0.285714	0.428571	0.285714
CECR2	ENSG00000099954	0	0	1	0	0	0.75	0	0.25	0	0.714286	0.0952381	0.190476	0	0.583333	0.25	0.166667	0	0	0	0	0.03125	0.53125	0.125	0.3125	0	0	0	0	0	0.75	0	0.25	0	0.8	0	0.2	0	0.866667	0.133333	0	0	1	0	0	0	0.333333	0	0.666667
KIAA2026	ENSG00000183354	0	0	0	1	0	0.615385	0.0384615	0.346154	0	0.8125	0.0625	0.125	0	0.722222	0.111111	0.166667	0	0	0	1	0	0.647059	0.176471	0.176471	0	0	0	0	0	0.6	0.4	0	0	0.833333	0.0833333	0.0833333	0	0.5	0.0555556	0.444444	0	0	0	0	0	0	0	0
BRD1	ENSG00000100425	0	0	1	0	0.0833333	0.5	0	0.416667	0	0.4	0.4	0.2	0	0.75	0	0.25	0	0	0	0	0	0.818182	0.0909091	0.0909091	0	0	0	0	0	1	0	0	0	0.142857	0.428571	0.428571	0	0.8	0.2	0	0	1	0	0	0	0.75	0	0.25
BRPF3	ENSG00000096070	0	0	1	0	0	0.642857	0	0.357143	0	0.6	0.1	0.3	0	0.7	0.2	0.1	0	0	0	0	0	0.592593	0.185185	0.222222	0	0	0	0	0	1	0	0	0	0.666667	0.222222	0.111111	0	1	0	0	0	0	0	0	0	0.833333	0	0.166667
BRPF1	ENSG00000156983	0	1	0	0	0	0.7	0.1	0.2	0	0.625	0.25	0.125	0	0.857143	0	0.142857	0	0	0	0	0	0.736842	0.0526316	0.210526	0	0	0	0	0	0.5	0	0.5	0	0.5	0	0.5	0	0.571429	0.142857	0.285714	0	0	0	0	0	0.5	0	0.5
BRD7	ENSG00000166164	0	1	0	0	0	0.642857	0.142857	0.214286	0	0.75	0.125	0.125	0	0.8	0.2	0	0	0	1	0	0	0.533333	0.266667	0.2	0	0	0	0	0	0	1	0	0	0.75	0	0.25	0	0	1	0	0	0	0	0	0	0.75	0.25	0
BRD9	ENSG00000028310	0	0	0	0	0	0.571429	0	0.428571	0	0.375	0	0.625	0	0	0.333333	0.666667	0	0	0	1	0.0909091	0.636364	0	0.272727	0	0	0	0	0	0.5	0	0.5	0	1	0	0	0	0.625	0	0.375	0	0	0	0	0	0	0	1
BAZ2A	ENSG00000076108	0	0.5	0	0.5	0	0.4	0.45	0.15	0	0.611111	0.166667	0.222222	0	0.4	0.4	0.2	0	0	0	0	0.0454545	0.545455	0.227273	0.181818	0	1	0	0	0	0.857143	0.142857	0	0	0.625	0.125	0.25	0	0.5	0.125	0.375	0	0	0	0	0	1	0	0
BAZ2B	ENSG00000123636	0	1	0	0	0	0.774194	0.0967742	0.129032	0	0.758621	0.172414	0.0689655	0	0.777778	0.111111	0.111111	0	0	0	0	0	0.708333	0.125	0.166667	0	1	0	0	0	0.833333	0.166667	0	0	0.846154	0	0.153846	0	0.727273	0.0909091	0.181818	0	0	0	0	0	0.875	0.125	0
ATAD2	ENSG00000156802	0	0	0	0	0	0.71875	0.15625	0.125	0	0.571429	0.0952381	0.333333	0	0.733333	0.0666667	0.2	0	0	0	1	0	0.47619	0.380952	0.142857	0	0	0	0	0	0.375	0.25	0.375	0	1	0	0	0	0.75	0	0.25	0	0	0	0	0.333333	0.333333	0.333333	0
ATAD2B	ENSG00000119778	0	0.5	0	0.5	0	0.777778	0	0.222222	0	0.7	0.25	0.05	0	0.5	0.333333	0.166667	0	0.5	0.5	0	0	0.380952	0.47619	0.142857	0	0	0	0	0	0.5	0.5	0	0	0.75	0.25	0	0	0.75	0.0833333	0.166667	0	0	0	0	0	0.75	0.25	0
BRD8	ENSG00000112983	0	0	0	0	0	0.714286	0.142857	0.142857	0	0.857143	0.142857	0	0	1	0	0	0	0	0	0	0	0.5	0.3	0.2	0	0	0	0	0	0.333333	0.666667	0	0	1	0	0	0	0.8	0.1	0.1	0	0	0	0	0	0.5	0.166667	0.333333
BRWD3	ENSG00000165288	0	1	0	0	0	0.636364	0.0909091	0.272727	0	0.62963	0.185185	0.185185	0	0.607143	0.142857	0.25	0	1	0	0	0	0.6	0.2	0.2	0	0	1	0	0	0.6	0.2	0.2	0	0.636364	0.0909091	0.272727	0	0.777778	0.111111	0.111111	0	0	0	1	0	0.833333	0	0.166667
BRWD1	ENSG00000185658	0	0	1	0	0	0.857143	0.0714286	0.0714286	0	0.6	0.2	0.2	0	0.882353	0	0.117647	0	1	0	0	0	0.392857	0.392857	0.214286	0	0	0	0	0	0.333333	0.333333	0.333333	0	0.625	0.25	0.125	0	0.538462	0.307692	0.153846	0	0	0	0	0	0.714286	0	0.285714
PHIP	ENSG00000146247	0	0	0	0	0	0.8	0.1	0.1	0.111111	0.388889	0.222222	0.277778	0	1	0	0	0	1	0	0	0	0.636364	0.151515	0.212121	0	0	0	1	0	0.4	0.2	0.4	0	0.777778	0.111111	0.111111	0	0.857143	0.142857	0	0	1	0	0	0	0.5	0	0.5
HDAC1	ENSG00000116478	0	0.5	0	0.5	0	0.5	0.166667	0.333333	0	0.461538	0.230769	0.307692	0	0	0	1	0	0	0	0	0.4	0.4	0	0.2	0	0	0	0	0	0	0	0	0	1	0	0	0	1	0	0	0	0	0	0	0	0.5	0	0.5
HDAC2	ENSG00000196591	0	0	0	0	0	0.75	0	0.25	0	0.333333	0.666667	0	0	0.333333	0.333333	0.333333	0	0	0	0	0	0.375	0.625	0	0	1	0	0	0	0	0	0	0	0.666667	0.333333	0	0	0.4	0.2	0.4	0	0	0	0	0	0	0	1
HDAC3	ENSG00000171720	0	0	0	0	0	0.25	0	0.75	0	0.333333	0.333333	0.333333	0	1	0	0	0	0	0	0	0	1	0	0	0	0	0	0	0.333333	0.333333	0	0.333333	0	0.333333	0.333333	0.333333	0	1	0	0	0	0	0	0	0	0	0	0
HDAC8	ENSG00000147099	0	0	0	0	0	1	0	0	0	0.571429	0.285714	0.142857	0	1	0	0	0	0	0	0	0	0.8	0.2	0	0	1	0	0	0	0	0	0	0	0.25	0.25	0.5	0	0.5	0	0.5	0	0	0	0	0	0	0	0
HDAC11	ENSG00000163517	0	0	0	0	0	1	0	0	0	0.666667	0	0.333333	0	0.5	0.5	0	0	0	0	0	0	0.571429	0.285714	0.142857	0	0	0	0	0	0	0.5	0.5	0	0	0	0	0	0.5	0.25	0.25	0	1	0	0	0	0	0	0
HDAC10	ENSG00000100429	0	0	0	0	0	0.428571	0	0.571429	0	0.666667	0	0.333333	0	0.5	0	0.5	0	0	0	0	0	0.545455	0	0.454545	0	0	0	0	0	0	0	0	0	0	0	1	0	0.6	0.2	0.2	0	0	0	0	0	1	0	0
HDAC6	ENSG00000094631	0	0.666667	0	0.333333	0	0.833333	0.0833333	0.0833333	0	0.705882	0.0588235	0.235294	0	0.9	0	0.1	0	0	0	0	0	0.733333	0.0666667	0.2	0	0	0	0	0	0.75	0.25	0	0	0.8	0	0.2	0	0.777778	0	0.222222	0	0	0	0	0	0.5	0	0.5
HDAC7	ENSG00000061273	0	0.5	0	0.5	0	0.4	0	0.6	0.5	0	0	0.5	0	0.833333	0	0.166667	0	0	0	0	0.153846	0.538462	0	0.307692	0	0	0	0	0	0	0	0	0	0	0.5	0.5	0	1	0	0	0	0	0.5	0.5	0	1	0	0
HDAC4	ENSG00000068024	0	1	0	0	0	0.428571	0	0.571429	0	0.545455	0.0909091	0.363636	0	0.428571	0	0.571429	0	0	0	0	0	0.625	0.291667	0.0833333	0	0	0	0	0	0.857143	0	0.142857	0.2	0.6	0	0.2	0	0.615385	0.153846	0.230769	0	0	0	0	0	1	0	0
HDAC5	ENSG00000108840	0	0	0	1	0	0.625	0.125	0.25	0	0.625	0.125	0.25	0	0.727273	0	0.272727	0	0	0	0	0	0.526316	0.210526	0.263158	0	0	0	0	0	0.4	0	0.6	0	0.666667	0	0.333333	0	0.4	0	0.6	0	1	0	0	0	0	0	0
HDAC9	ENSG00000048052	0	0.5	0	0.5	0	0.384615	0.153846	0.461538	0	0.428571	0.285714	0.285714	0	0.555556	0.111111	0.333333	0	1	0	0	0	0.545455	0.136364	0.318182	0	1	0	0	0	0.666667	0.222222	0.111111	0	0.636364	0.0909091	0.272727	0	0.619048	0.142857	0.238095	0	1	0	0	0	0.5	0.25	0.25
SIRT6	ENSG00000077463	0	0	0	0	0	1	0	0	0	0.333333	0.666667	0	0	1	0	0	0	0	0	0	0	0.625	0.125	0.25	0	0	0	0	0	1	0	0	0	0	0	0	0	0	0	0	0	0	0	0	0	1	0	0
SIRT3	ENSG00000142082	0	0	0	0	0	1	0	0	0	1	0	0	0	1	0	0	0	0	0	0	0	0.8	0	0.2	0	0	0	0	0	0.5	0	0.5	0	0.333333	0.333333	0.333333	0	1	0	0	0	0	1	0	0	0	0	0
SIRT1	ENSG00000096717	0	1	0	0	0	0.888889	0.111111	0	0	1	0	0	0	0.333333	0.333333	0.333333	0	0	0	0	0	0.7	0.1	0.2	0	0	0	0	0	1	0	0	0	1	0	0	0	1	0	0	0	0	0	0	0	0.5	0.5	0
SIRT2	ENSG00000068903	0	0	0	0	0	0.666667	0	0.333333	0	0.6	0	0.4	0	1	0	0	0	0	0	0	0	0.333333	0	0.666667	0	0	0	0	0	0	0	1	0	1	0	0	0	0.333333	0	0.666667	0	0	0	0	0	0	0	0
SIRT7	ENSG00000187531	0	0	0	0	0	0.75	0.25	0	0	0.5	0.25	0.25	0	1	0	0	0	0	0	0	0	0.8	0	0.2	0	0	0	1	0	1	0	0	0	1	0	0	0	0.333333	0	0.666667	0	0	0	0	0	1	0	0
SIRT4	ENSG00000089163	0	0	0	0	0	0.666667	0.333333	0	0	1	0	0	0	0.666667	0	0.333333	0	0	0	0	0	0.5	0.25	0.25	0	0.5	0	0.5	0	0	0	1	0	1	0	0	0	1	0	0	0	0	0	0	0	1	0	0
SIRT5	ENSG00000124523	0	0	0	0	0	0.75	0	0.25	0	0.5	0	0.5	0	0.666667	0.333333	0	0	0	0	0	0	0.8	0	0.2	0	0	0	0	0	0	0	0	0	1	0	0	0	1	0	0	0	0	0	0	0	0	0	0
[truncated: 84 more columns]
