# Supplementary material for: Genomic characterization of genes encoding histone acetylation modulator proteins identifies therapeutic targets for cancer treatment
Source: Nat Commun. 2019 Feb 13;10:733. doi: 10.1038/s41467-019-08554-x (PMC6374416; doi:10.1038/s41467-019-08554-x)
Supplement: Supplementary file 19 — Supplementary Data 17 [file 41467_2019_8554_MOESM19_ESM.xlsx]

## Sheet: Supplementary Table 17
Supplementary Data 17. Summary of the mutations within the significantly mutated HAMP Pfam domains
Pfam_ID	Domain	Multiple_Aln_pos	Gene_Symbol	Amino_Acid_Position	Amino_Acid_Change	Sample	Tumor_Type	metric	Entry	UNIPROT	Chromosome
PF00439	Bromodomain	54	ASH1L	2497	p.T2497A	TCGA-VQ-A8PB-01A	STAD	0.0107565	Q9NR48	ASH1L_HUMAN	1q22
PF00439	Bromodomain	54	BAZ1A	1480	p.R1480C	TCGA-AZ-4315-01A	COAD	0.0107565	Q9NRL2	BAZ1A_HUMAN	14q13.2
PF00439	Bromodomain	54	BAZ1A	1480	p.R1480C	TCGA-FW-A3R5-06A	SKCM	0.0107565	Q9NRL2	BAZ1A_HUMAN	14q13.2
PF00439	Bromodomain	54	BAZ1A	1480	p.R1480C	TCGA-IN-8462-01A	STAD	0.0107565	Q9NRL2	BAZ1A_HUMAN	14q13.2
PF00439	Bromodomain	54	BAZ1A	1480	p.R1480S	TCGA-BS-A0UV-01A	UCEC	0.0107565	Q9NRL2	BAZ1A_HUMAN	14q13.2
PF00439	Bromodomain	54	BAZ1A	1480	p.R1480C	TCGA-D1-A16Y-01A	UCEC	0.0107565	Q9NRL2	BAZ1A_HUMAN	14q13.2
PF00439	Bromodomain	54	BAZ1A	1480	p.R1480C	TCGA-EO-A22X-01A	UCEC	0.0107565	Q9NRL2	BAZ1A_HUMAN	14q13.2
PF00439	Bromodomain	54	BRD2	400	p.X400_splice	TCGA-A4-A5Y0-01A	KIRP	0.0107565	P25440	BRD2_HUMAN	6p21.3
PF00439	Bromodomain	54	BRD2	400	p.K400R	TCGA-TM-A84R-01A	LGG	0.0107565	P25440	BRD2_HUMAN	6p21.3
PF00439	Bromodomain	54	BRD9	187	p.K187T	TCGA-AJ-A3EL-01A	UCEC	0.0107565	Q9H8M2	BRD9_HUMAN	5p15.33
PF00439	Bromodomain	54	BRDT	323	p.K323N	TCGA-37-4130-01A	LUSC	0.0107565	Q58F21	BRDT_HUMAN	1p22.1
PF00439	Bromodomain	54	BRWD1	1211	p.R1211*	TCGA-FW-A3R5-06A	SKCM	0.0107565	Q9NSI6	BRWD1_HUMAN	21q22.2
PF00439	Bromodomain	54	BRWD1	1211	p.R1211*	TCGA-A5-A0G2-01A	UCEC	0.0107565	Q9NSI6	BRWD1_HUMAN	21q22.2
PF00439	Bromodomain	54	BRWD1	1211	p.R1211*	TCGA-B5-A0JY-01A	UCEC	0.0107565	Q9NSI6	BRWD1_HUMAN	21q22.2
PF00439	Bromodomain	54	CREBBP	1139	p.K1139E	TCGA-BR-6566-01A	STAD	0.0107565	Q92793	CBP_HUMAN	16p13.3
PF00439	Bromodomain	54	PBRM1	710	p.R710*	TCGA-28-1752-01A	GBM	0.0107565	Q86U86	PB1_HUMAN	3p21
PF00439	Bromodomain	54	PBRM1	710	p.R710*	TCGA-B0-5700-01A	KIRC	0.0107565	Q86U86	PB1_HUMAN	3p21
PF00439	Bromodomain	54	PBRM1	710	p.R710*	TCGA-BP-5187-01A	KIRC	0.0107565	Q86U86	PB1_HUMAN	3p21
PF00439	Bromodomain	54	PBRM1	710	p.R710*	TCGA-4A-A93X-01A	KIRP	0.0107565	Q86U86	PB1_HUMAN	3p21
PF00439	Bromodomain	54	PBRM1	710	p.R710*	TCGA-EE-A2MF-06A	SKCM	0.0107565	Q86U86	PB1_HUMAN	3p21
PF00439	Bromodomain	54	PBRM1	710	p.R710*	TCGA-A5-A2K5-01A	UCEC	0.0107565	Q86U86	PB1_HUMAN	3p21
PF00439	Bromodomain	54	PBRM1	710	p.R710*	TCGA-AJ-A5DW-01A	UCEC	0.0107565	Q86U86	PB1_HUMAN	3p21
PF00439	Bromodomain	54	PBRM1	710	p.R710*	TCGA-B5-A1MR-01A	UCEC	0.0107565	Q86U86	PB1_HUMAN	3p21
PF00439	Bromodomain	54	PBRM1	710	p.R710*	TCGA-DF-A2KU-01A	UCEC	0.0107565	Q86U86	PB1_HUMAN	3p21
PF00439	Bromodomain	54	PBRM1	710	p.R710*	TCGA-EY-A1G8-01A	UCEC	0.0107565	Q86U86	PB1_HUMAN	3p21
PF00439	Bromodomain	54	PBRM1	710	p.R710*	TCGA-ND-A4WC-01A	UCS	0.0107565	Q86U86	PB1_HUMAN	3p21
PF00439	Bromodomain	66	BAZ1B	1399	p.R1399H	TCGA-EO-A22U-01A	UCEC	0.0112102	Q9UIG0	BAZ1B_HUMAN	7q11.23
PF00439	Bromodomain	66	BAZ1B	1399	p.R1399C	TCGA-FI-A2D0-01A	UCEC	0.0112102	Q9UIG0	BAZ1B_HUMAN	7q11.23
PF00439	Bromodomain	66	BAZ2A	1853	p.T1853I	TCGA-A6-6781-01A	COAD	0.0112102	Q9UIF9	BAZ2A_HUMAN	12q13.3
PF00439	Bromodomain	66	BRD4	413	p.R413H	TCGA-CN-5369-01A	HNSC	0.0112102	O60885	BRD4_HUMAN	19p13.12
PF00439	Bromodomain	66	BRD7	191	p.Q191E	TCGA-DS-A1OB-01A	CESC	0.0112102	Q9NPI1	BRD7_HUMAN	16q12.1
PF00439	Bromodomain	66	BRD7	191	p.Q191*	TCGA-CV-A6K2-01A	HNSC	0.0112102	Q9NPI1	BRD7_HUMAN	16q12.1
PF00439	Bromodomain	66	BRD8	1163	p.R1163C	TCGA-AO-A03N-01B	BRCA	0.0112102	Q9H0E9	BRD8_HUMAN	5q31
PF00439	Bromodomain	66	BRD8	1163	p.R1163H	TCGA-AA-3713-01A	COAD	0.0112102	Q9H0E9	BRD8_HUMAN	5q31
PF00439	Bromodomain	66	BRD8	767	p.R767*	TCGA-CN-5356-01A	HNSC	0.0112102	Q9H0E9	BRD8_HUMAN	5q31
PF00439	Bromodomain	66	BRD8	1163	p.R1163H	TCGA-44-2656-01A	LUAD	0.0112102	Q9H0E9	BRD8_HUMAN	5q31
PF00439	Bromodomain	66	BRD8	767	p.R767L	TCGA-NJ-A55R-01A	LUAD	0.0112102	Q9H0E9	BRD8_HUMAN	5q31
PF00439	Bromodomain	66	BRD8	1163	p.R1163H	TCGA-HU-A4GN-01A	STAD	0.0112102	Q9H0E9	BRD8_HUMAN	5q31
PF00439	Bromodomain	66	BRDT	89	p.A89V	TCGA-75-6214-01A	LUAD	0.0112102	Q58F21	BRDT_HUMAN	1p22.1
PF00439	Bromodomain	66	BRWD3	1201	p.X1201_splice	TCGA-73-4666-01A	LUAD	0.0112102	Q6RI45	BRWD3_HUMAN	Xq21.1
PF00439	Bromodomain	66	EP300	1112	p.Q1112*	TCGA-XF-A9SM-01A	BLCA	0.0112102	Q09472	EP300_HUMAN	22q13.2
PF00439	Bromodomain	66	PBRM1	243	p.K243*	TCGA-A3-3373-01A	KIRC	0.0112102	Q86U86	PB1_HUMAN	3p21
PF00439	Bromodomain	66	PBRM1	581	p.A581Efs*19	TCGA-CJ-4920-01A	KIRC	0.0112102	Q86U86	PB1_HUMAN	3p21
PF00439	Bromodomain	66	PBRM1	719	p.Q719*	TCGA-G6-A8L8-01A	KIRC	0.0112102	Q86U86	PB1_HUMAN	3p21
PF00439	Bromodomain	66	PBRM1	719	p.Q719R	TCGA-BR-6452-01A	STAD	0.0112102	Q86U86	PB1_HUMAN	3p21
PF00439	Bromodomain	66	PHIP	1219	p.R1219M	TCGA-MP-A4T7-01A	LUAD	0.0112102	Q8WWQ0	PHIP_HUMAN	6q14
PF00439	Bromodomain	66	SMARCA4	1520	p.R1520H	TCGA-AX-A2HG-01A	UCEC	0.0112102	P51532	SMCA4_HUMAN	19p13.3
PF00439	Bromodomain	66	SMARCA4	1520	p.R1520H	TCGA-BG-A18B-01A	UCEC	0.0112102	P51532	SMCA4_HUMAN	19p13.3
PF00439	Bromodomain	66	SP140	814	p.P814L	TCGA-EE-A2GO-06A	SKCM	0.0112102	Q13342	SP140_HUMAN	2q37.1
PF00439	Bromodomain	66	TAF1L	1582	p.Q1582E	TCGA-19-1786-01A	GBM	0.0112102	Q8IZX4	TAF1L_HUMAN	9p12
PF00439	Bromodomain	66	TAF1L	1459	p.P1459L	TCGA-EE-A29R-06A	SKCM	0.0112102	Q8IZX4	TAF1L_HUMAN	9p12
PF08214	HAT_KAT11	94	CREBBP	1435	p.D1435Y	TCGA-BL-A5ZZ-01A	BLCA	3.45793e-07	Q92793	CBP_HUMAN	16p13.3
PF08214	HAT_KAT11	94	CREBBP	1435	p.D1435H	TCGA-CU-A3YL-01A	BLCA	3.45793e-07	Q92793	CBP_HUMAN	16p13.3
PF08214	HAT_KAT11	94	CREBBP	1435	p.D1435H	TCGA-FD-A3SL-01A	BLCA	3.45793e-07	Q92793	CBP_HUMAN	16p13.3
PF08214	HAT_KAT11	94	CREBBP	1435	p.D1435G	TCGA-ZF-A9RN-01A	BLCA	3.45793e-07	Q92793	CBP_HUMAN	16p13.3
PF08214	HAT_KAT11	94	CREBBP	1435	p.D1435Y	TCGA-66-2793-01A	LUSC	3.45793e-07	Q92793	CBP_HUMAN	16p13.3
PF08214	HAT_KAT11	94	EP300	1399	p.D1399Y	TCGA-DK-A2I6-01A	BLCA	3.45793e-07	Q09472	EP300_HUMAN	22q13.2
PF08214	HAT_KAT11	94	EP300	1399	p.D1399N	TCGA-C5-A7CG-01A	CESC	3.45793e-07	Q09472	EP300_HUMAN	22q13.2
PF08214	HAT_KAT11	94	EP300	1399	p.D1399N	TCGA-EA-A5O9-01A	CESC	3.45793e-07	Q09472	EP300_HUMAN	22q13.2
PF08214	HAT_KAT11	94	EP300	1399	p.D1399N	TCGA-EX-A1H5-01A	CESC	3.45793e-07	Q09472	EP300_HUMAN	22q13.2
PF08214	HAT_KAT11	94	EP300	1399	p.D1399N	TCGA-JW-A852-01A	CESC	3.45793e-07	Q09472	EP300_HUMAN	22q13.2
PF08214	HAT_KAT11	94	EP300	1399	p.D1399N	TCGA-AA-A02R-01A	COAD	3.45793e-07	Q09472	EP300_HUMAN	22q13.2
PF08214	HAT_KAT11	94	EP300	1399	p.D1399N	TCGA-BB-A6UM-01A	HNSC	3.45793e-07	Q09472	EP300_HUMAN	22q13.2
PF08214	HAT_KAT11	94	EP300	1399	p.D1399N	TCGA-CR-6470-01A	HNSC	3.45793e-07	Q09472	EP300_HUMAN	22q13.2
PF08214	HAT_KAT11	94	EP300	1399	p.D1399N	TCGA-CV-7100-01A	HNSC	3.45793e-07	Q09472	EP300_HUMAN	22q13.2
PF08214	HAT_KAT11	94	EP300	1399	p.D1399N	TCGA-CV-7427-01A	HNSC	3.45793e-07	Q09472	EP300_HUMAN	22q13.2
PF08214	HAT_KAT11	94	EP300	1399	p.D1399N	TCGA-DQ-7593-01A	HNSC	3.45793e-07	Q09472	EP300_HUMAN	22q13.2
PF08214	HAT_KAT11	94	EP300	1399	p.D1399N	TCGA-21-5786-01A	LUSC	3.45793e-07	Q09472	EP300_HUMAN	22q13.2
PF08214	HAT_KAT11	94	EP300	1399	p.D1399N	TCGA-58-8387-01A	LUSC	3.45793e-07	Q09472	EP300_HUMAN	22q13.2
PF08214	HAT_KAT11	94	EP300	1399	p.D1399N	TCGA-66-2763-01A	LUSC	3.45793e-07	Q09472	EP300_HUMAN	22q13.2
PF08214	HAT_KAT11	94	EP300	1399	p.D1399N	TCGA-AJ-A3EL-01A	UCEC	3.45793e-07	Q09472	EP300_HUMAN	22q13.2
PF08214	HAT_KAT11	105	CREBBP	1446	p.R1446C	TCGA-FD-A3SP-01A	BLCA	4.20199e-06	Q92793	CBP_HUMAN	16p13.3
PF08214	HAT_KAT11	105	CREBBP	1446	p.R1446L	TCGA-K4-A5RH-01A	BLCA	4.20199e-06	Q92793	CBP_HUMAN	16p13.3
PF08214	HAT_KAT11	105	CREBBP	1446	p.R1446C	TCGA-LP-A4AV-01A	CESC	4.20199e-06	Q92793	CBP_HUMAN	16p13.3
PF08214	HAT_KAT11	105	CREBBP	1446	p.R1446H	TCGA-AA-A00N-01A	COAD	4.20199e-06	Q92793	CBP_HUMAN	16p13.3
PF08214	HAT_KAT11	105	CREBBP	1446	p.R1446C	TCGA-G4-6311-01A	COAD	4.20199e-06	Q92793	CBP_HUMAN	16p13.3
PF08214	HAT_KAT11	105	CREBBP	1446	p.R1446L	TCGA-VR-AA7D-01A	ESCA	4.20199e-06	Q92793	CBP_HUMAN	16p13.3
PF08214	HAT_KAT11	105	CREBBP	1446	p.R1446H	TCGA-14-1453-01A	GBM	4.20199e-06	Q92793	CBP_HUMAN	16p13.3
PF08214	HAT_KAT11	105	CREBBP	1446	p.R1446C	TCGA-CN-A6V3-01A	HNSC	4.20199e-06	Q92793	CBP_HUMAN	16p13.3
PF08214	HAT_KAT11	105	CREBBP	1446	p.R1446C	TCGA-UF-A71D-01A	HNSC	4.20199e-06	Q92793	CBP_HUMAN	16p13.3
PF08214	HAT_KAT11	105	CREBBP	1446	p.R1446C	TCGA-77-8008-01A	LUSC	4.20199e-06	Q92793	CBP_HUMAN	16p13.3
PF08214	HAT_KAT11	105	CREBBP	1446	p.R1446H	TCGA-NC-A5HI-01A	LUSC	4.20199e-06	Q92793	CBP_HUMAN	16p13.3
PF08214	HAT_KAT11	105	CREBBP	1446	p.R1446C	TCGA-EE-A3J7-06A	SKCM	4.20199e-06	Q92793	CBP_HUMAN	16p13.3
PF08214	HAT_KAT11	105	CREBBP	1446	p.R1446H	TCGA-HU-A4GU-01A	STAD	4.20199e-06	Q92793	CBP_HUMAN	16p13.3
PF08214	HAT_KAT11	105	CREBBP	1446	p.R1446H	TCGA-BK-A6W4-01A	UCEC	4.20199e-06	Q92793	CBP_HUMAN	16p13.3
PF08214	HAT_KAT11	105	CREBBP	1446	p.R1446H	TCGA-BS-A0UV-01A	UCEC	4.20199e-06	Q92793	CBP_HUMAN	16p13.3
PF08214	HAT_KAT11	105	EP300	1410	p.R1410S	TCGA-BA-A6DA-01A	HNSC	4.20199e-06	Q09472	EP300_HUMAN	22q13.2
PF08214	HAT_KAT11	124	CREBBP	1465	p.G1465E	TCGA-VS-A9UB-01A	CESC	0.0389077	Q92793	CBP_HUMAN	16p13.3
PF08214	HAT_KAT11	124	CREBBP	1465	p.X1465_splice	TCGA-85-8276-01A	LUSC	0.0389077	Q92793	CBP_HUMAN	16p13.3
PF08214	HAT_KAT11	124	EP300	1429	p.X1429_splice	TCGA-AB-2830-03B	LAML	0.0389077	Q09472	EP300_HUMAN	22q13.2
PF08214	HAT_KAT11	124	EP300	1429	p.X1429_splice	TCGA-AB-2846-03B	LAML	0.0389077	Q09472	EP300_HUMAN	22q13.2
PF08214	HAT_KAT11	124	EP300	1429	p.X1429_splice	TCGA-AB-2867-03B	LAML	0.0389077	Q09472	EP300_HUMAN	22q13.2
PF08214	HAT_KAT11	124	EP300	1429	p.X1429_splice	TCGA-AB-2886-03A	LAML	0.0389077	Q09472	EP300_HUMAN	22q13.2
PF08214	HAT_KAT11	124	EP300	1429	p.X1429_splice	TCGA-95-7043-01A	LUAD	0.0389077	Q09472	EP300_HUMAN	22q13.2
PF00850	Hist_deacetyl	246	HDAC4	901	p.M902Wfs*55	TCGA-CK-5916-01A	COAD	0.00063121	P56524	HDAC4_HUMAN	2q37.3
PF00850	Hist_deacetyl	246	HDAC4	901	p.M902Wfs*55	TCGA-D5-6540-01A	COAD	0.00063121	P56524	HDAC4_HUMAN	2q37.3
PF00850	Hist_deacetyl	246	HDAC4	901	p.M902Wfs*55	TCGA-BR-4361-01A	STAD	0.00063121	P56524	HDAC4_HUMAN	2q37.3
PF00850	Hist_deacetyl	246	HDAC4	901	p.M902Wfs*55	TCGA-BR-8487-01A	STAD	0.00063121	P56524	HDAC4_HUMAN	2q37.3
PF00850	Hist_deacetyl	246	HDAC4	901	p.M902Wfs*55	TCGA-D7-A4YY-01A	STAD	0.00063121	P56524	HDAC4_HUMAN	2q37.3
PF00850	Hist_deacetyl	246	HDAC4	901	p.M902Wfs*55	TCGA-HU-A4GN-01A	STAD	0.00063121	P56524	HDAC4_HUMAN	2q37.3
PF00850	Hist_deacetyl	246	HDAC4	901	p.M902Wfs*55	TCGA-AP-A1DM-01A	UCEC	0.00063121	P56524	HDAC4_HUMAN	2q37.3
PF00850	Hist_deacetyl	246	HDAC4	901	p.M902Hfs*5	TCGA-AX-A2IN-01A	UCEC	0.00063121	P56524	HDAC4_HUMAN	2q37.3
PF00850	Hist_deacetyl	246	HDAC4	901	p.M902Wfs*55	TCGA-B5-A1MX-01A	UCEC	0.00063121	P56524	HDAC4_HUMAN	2q37.3
PF00850	Hist_deacetyl	246	HDAC4	901	p.M902Wfs*55	TCGA-BG-A2L7-01A	UCEC	0.00063121	P56524	HDAC4_HUMAN	2q37.3
PF00850	Hist_deacetyl	246	HDAC4	901	p.M902Wfs*55	TCGA-BS-A0U8-01A	UCEC	0.00063121	P56524	HDAC4_HUMAN	2q37.3
PF00850	Hist_deacetyl	246	HDAC4	901	p.M902Wfs*55	TCGA-PG-A6IB-01A	UCEC	0.00063121	P56524	HDAC4_HUMAN	2q37.3
PF00850	Hist_deacetyl	246	HDAC6	709	p.R709H	TCGA-AX-A0J1-01A	UCEC	0.00063121	Q9UBN7	HDAC6_HUMAN	Xp11.23
PF00850	Hist_deacetyl	246	HDAC6	709	p.R709C	TCGA-DF-A2KU-01A	UCEC	0.00063121	Q9UBN7	HDAC6_HUMAN	Xp11.23
PF01853	MOZ_SAS	103	KAT6A	664	p.D664N	TCGA-AA-A00N-01A	COAD	0.0365618	Q92794	KAT6A_HUMAN	8p11
PF01853	MOZ_SAS	103	KAT6A	664	p.D664N	TCGA-AZ-4315-01A	COAD	0.0365618	Q92794	KAT6A_HUMAN	8p11
PF01853	MOZ_SAS	103	KAT6A	664	p.D664N	TCGA-AP-A1DV-01A	UCEC	0.0365618	Q92794	KAT6A_HUMAN	8p11
PF01853	MOZ_SAS	103	KAT6A	664	p.D664N	TCGA-QF-A5YS-01A	UCEC	0.0365618	Q92794	KAT6A_HUMAN	8p11
PF01853	MOZ_SAS	103	KAT6B	875	p.D875N	TCGA-A8-A079-01A	BRCA	0.0365618	Q8WYB5	KAT6B_HUMAN	10q22.2
PF01853	MOZ_SAS	103	KAT6B	875	p.D875N	TCGA-20-1687-01A	OV	0.0365618	Q8WYB5	KAT6B_HUMAN	10q22.2
PF01853	MOZ_SAS	103	KAT7	492	p.D492N	TCGA-AX-A1CE-01A	UCEC	0.0365618	O95251	KAT7_HUMAN	17q21.32
