# Supplementary material for: Genomic characterization of genes encoding histone acetylation modulator proteins identifies therapeutic targets for cancer treatment
Source: Nat Commun. 2019 Feb 13;10:733. doi: 10.1038/s41467-019-08554-x (PMC6374416; doi:10.1038/s41467-019-08554-x)
Supplement: Supplementary file 21 — Supplementary Data 19 [file 41467_2019_8554_MOESM21_ESM.xlsx]

## Sheet: Supplementary Table 19
Supplementary Data 19. Summary of the transcript fusions of the HAMPs in each cancer type
Cancer Type	Sample Number	No. Fusion Transcripts	Tier1	Tier2	Tier3	Tier4
ACC	79	3	2	0	1	0
BLCA	408	25	18	5	1	1
BRCA	1095	85	67	6	8	4
CESC	304	8	6	0	1	1
CHOL	36	1	0	0	1	0
COAD	290	1	1	0	0	0
DLBC	48	1	1	0	0	0
ESCA	184	8	8	0	0	0
GBM	172	3	1	2	0	0
HNSC	520	7	7	0	0	0
KIRC	533	3	2	0	1	0
KIRP	290	5	1	3	1	0
LAML	179	14	12	0	0	2
LGG	516	15	14	1	0	0
LIHC	371	9	9	0	0	0
LUAD	516	41	32	4	4	1
LUSC	501	34	20	5	5	4
MESO	87	3	2	1	0	0
OV	422	6	5	1	0	0
PAAD	178	3	2	0	1	0
PCPG	179	3	1	2	0	0
PRAD	497	29	16	6	3	4
READ	94	3	2	0	1	0
SARC	259	17	11	5	1	0
SKCM	469	18	14	3	1	0
STAD	414	17	14	1	0	2
TGCT	150	1	1	0	0	0
THCA	505	1	1	0	0	0
THYM	120	1	1	0	0	0
UCEC	180	26	22	3	0	1
UCS	57	9	5	2	0	2
CHOL	DLBC	COAD		THCA	THYM
