# Supplementary material for: Genomic characterization of genes encoding histone acetylation modulator proteins identifies therapeutic targets for cancer treatment
Source: Nat Commun. 2019 Feb 13;10:733. doi: 10.1038/s41467-019-08554-x (PMC6374416; doi:10.1038/s41467-019-08554-x)
Supplement: Supplementary file 23 — Supplementary Data 21 [file 41467_2019_8554_MOESM23_ESM.xlsx]

## Sheet: Supplementary Table 21
Supplementary Data 21. Summary of the total genomic alteration events of the HAMPs in each cancer type
Cancer Type	Total Recurrent Events	Mutation	SCNA_Amp	SCNA_Del
KIRC	6	1	2	3
KIRP	1	1	0	0
KICH	0	0	0	0
PRAD	2	1	0	1
BLCA	25	8	5	12
THYM	0	0	0	0
MESO	2	0	0	2
LUAD	10	3	4	3
LUSC	20	7	3	10
HNSC	15	7	2	6
ESCA	11	0	4	7
STAD	2	1	1	0
COAD	6	4	2	0
READ	4	0	3	1
PAAD	0	0	0	0
LIHC	3	1	2	0
CHOL	7	1	1	5
ACC	4	0	3	1
PCPG	0	0	0	0
THCA	0	0	0	0
BRCA	12	6	3	3
OV	9	0	3	6
CESC	16	8	3	5
UCEC	31	24	5	2
UCS	10	0	1	9
SARC	13	0	3	10
TGCT	3	0	3	0
LAML	1	0	1	0
DLBC	0	0	0	0
LGG	3	0	2	1
GBM	4	2	0	2
UVM	2	0	2	0
SKCM	20	8	8	4
