# Supplementary material for: Genomic characterization of genes encoding histone acetylation modulator proteins identifies therapeutic targets for cancer treatment
Source: Nat Commun. 2019 Feb 13;10:733. doi: 10.1038/s41467-019-08554-x (PMC6374416; doi:10.1038/s41467-019-08554-x)
Supplement: Supplementary file 24 — Supplementary Data 22 [file 41467_2019_8554_MOESM24_ESM.xlsx]

## Sheet: Supplementary Table 22
Supplementary Data 22. Summary of the PubTator score, patent applications, targeting small molecules, and related clinical trials for the HAMPs
HGNC Symbol	Ensembl Gene ID	Recurrent Score	Pubtator Score	Related patents in US	Drugs and small molecules	Related clinical trials
EP300	ENSG00000100393	8	3116.19	6	0	0
SIRT1	ENSG00000096717	1	1855.98	76	4	17
KMT2A	ENSG00000118058	6	1333.41	0	0	0
CREBBP	ENSG00000005339	6	1227.16	1	0	0
HDAC1	ENSG00000116478	0	741.69	38	32	729
HDAC9	ENSG00000048052	2	558.95	9	18	613
SMARCA4	ENSG00000127616	5	528	1	0	0
CLOCK	ENSG00000134852	5	427.03	6	0	0
PBRM1	ENSG00000163939	9	402.77	0	0	0
KAT2B	ENSG00000114166	2	390.09	0	0	0
HDAC6	ENSG00000094631	0	374.37	78	24	606
HDAC2	ENSG00000196591	5	373.8	29	30	728
BRD2	ENSG00000204256	1	345.74	28	11	35
NCOA3	ENSG00000124151	1	296.59	4	0	0
HDAC3	ENSG00000171720	2	276.04	22	31	729
KAT8	ENSG00000103510	2	272.21	0	0	0
SIRT2	ENSG00000068903	0	251.26	15	0	0
BRD4	ENSG00000141867	7	236.7	50	18	40
SIRT3	ENSG00000142082	6	219.93	16	0	0
HDAC4	ENSG00000068024	8	202.83	28	16	566
TAF1	ENSG00000147133	2	194.56	4	0	0
KAT5	ENSG00000172977	1	191.32	0	0	0
NCOA1	ENSG00000084676	0	172.6	1	0	0
TRIM33	ENSG00000197323	5	165.6	1	0	0
TRIM28	ENSG00000130726	2	158.53	0	0	0
HDAC8	ENSG00000147099	0	152.18	20	26	608
KAT2A	ENSG00000108773	1	146.99	0	0	0
SIRT6	ENSG00000077463	1	130.03	13	0	0
SP100	ENSG00000067066	7	128.27	2	0	0
SMARCA2	ENSG00000080503	3	114.34	2	0	0
HDAC5	ENSG00000108840	3	107	3	17	583
SP110	ENSG00000135899	5	96.96	8	0	0
HDAC7	ENSG00000061273	1	75.3	4	14	492
ATAD2	ENSG00000156802	8	73.3	8	0	0
PHIP	ENSG00000146247	2	73.09	5	0	0
KAT6B	ENSG00000156650	1	73.05	0	0	0
TRIM24	ENSG00000122779	3	65.9	3	0	0
KAT6A	ENSG00000083168	6	62.36	0	0	0
SIRT5	ENSG00000124523	4	53.09	7	0	0
SIRT7	ENSG00000187531	2	51.2	5	0	0
HAT1	ENSG00000128708	0	50.41	1	0	0
HDAC11	ENSG00000163517	1	45.06	1	15	587
BPTF	ENSG00000171634	8	43.87	2	0	0
BRD7	ENSG00000166164	2	39.96	1	0	0
KAT7	ENSG00000136504	3	38.99	0	0	0
SIRT4	ENSG00000089163	1	32.73	5	0	0
HDAC10	ENSG00000100429	6	31.37	3	18	593
BRDT	ENSG00000137948	0	31.06	0	5	10
ZMYND11	ENSG00000015171	3	29.37	0	0	0
BAZ1B	ENSG00000009954	2	29.12	0	0	0
BRD8	ENSG00000112983	2	29.01	0	0	0
BRD1	ENSG00000100425	8	27.51	2	0	0
BAZ2A	ENSG00000076108	2	26.69	0	0	0
ASH1L	ENSG00000116539	6	25.31	0	0	0
BRD3	ENSG00000169925	1	25.18	24	11	35
BAZ1A	ENSG00000198604	1	21.1	0	0	0
ELP3	ENSG00000134014	3	19.71	3	0	0
BRPF1	ENSG00000156983	3	17.77	0	0	0
ATAT1	ENSG00000137343	1	17.76	0	0	0
SP140	ENSG00000079263	3	10.91	4	0	0
CECR2	ENSG00000099954	1	6.89	0	0	0
BRWD3	ENSG00000165288	0	6.7	0	0	0
ZMYND8	ENSG00000101040	2	6.1	0	0	0
BRD9	ENSG00000028310	10	5.87	0	0	0
BAZ2B	ENSG00000123636	2	5.67	0	0	0
BRWD1	ENSG00000185658	4	4.44	1	0	0
ATAD2B	ENSG00000119778	4	2.33	0	0	0
TRIM66	ENSG00000166436	0	0.73	0	0	0
GTF3C4	ENSG00000125484	2	0.63	2	0	0
BRPF3	ENSG00000096070	1	0.44	0	0	0
TAF1L	ENSG00000122728	0	0.33	0	0	0
SP140L	ENSG00000185404	6	0.31	0	0	0
KIAA2026	ENSG00000183354	2	0.1	0	0	0
