# Supplementary material for: Genomic characterization of genes encoding histone acetylation modulator proteins identifies therapeutic targets for cancer treatment
Source: Nat Commun. 2019 Feb 13;10:733. doi: 10.1038/s41467-019-08554-x (PMC6374416; doi:10.1038/s41467-019-08554-x)
Supplement: Supplementary file 25 — Supplementary Data 23 [file 41467_2019_8554_MOESM25_ESM.xlsx]

## Sheet: Supplementary Table 23
Supplementary Data 23. List of the clinical trials with the HAMPs listed as primary targets
Drug and small molecules	Target gene	Related clinical trials
INCB054329	BRD2 ,BRD3 ,BRD4 ,BRDT	1
APABETALONE/RVX-208	BRD2, BRD3, BRD4	9
CHEMBL1232461/GSK525762	BRD2, BRD3, BRD4	6
CHEMBL2017291	BRD2, BRD3, BRD4	0
CHEMBL2153434	BRD2, BRD3, BRD4	0
CPI-0610	BRD2, BRD3, BRD4	4
OTX015/MK-8628	BRD2, BRD3, BRD4	6
BMS-986158	BRD2, BRD3, BRD4, BRDT	1
FT-1101	BRD2, BRD3, BRD4, BRDT	1
RO6870810	BRD2, BRD3, BRD4, BRDT	5
ZEN003694	BRD2, BRD3, BRD4, BRDT	2
AZD5153	BRD4	1
BI-2536	BRD4	0
CHEMBL2179387	BRD4	0
CHEMBL2335153	BRD4	0
CHEMBL2431090	BRD4	0
CHEMBL3086883	BRD4	0
SF1126	BRD4	4
4SC-202	HDAC1, HDAC2, HDAC3	2
ENTINOSTAT	HDAC1, HDAC2, HDAC3	55
TACEDINALINE	HDAC1, HDAC2, HDAC3	3
HBI-8000	HDAC1, HDAC2, HDAC3, HDAC10	10
MOCETINOSTAT	HDAC1, HDAC2, HDAC3, HDAC11	21
BELINOSTAT	HDAC1, HDAC2, HDAC3, HDAC4, HDAC5, HDAC6, HDAC7, HDAC8, HDAC9, HDAC10, HDAC11	43
CHEMBL1851943/PRACINOSTAT	HDAC1, HDAC2, HDAC3, HDAC4, HDAC5, HDAC6, HDAC7, HDAC8, HDAC9, HDAC10, HDAC11	14
CHEMBL191482/AR-2	HDAC1, HDAC2, HDAC3, HDAC4, HDAC5, HDAC6, HDAC7, HDAC8, HDAC9, HDAC10, HDAC11	5
CHEMBL609583/R306465	HDAC1, HDAC2, HDAC3, HDAC4, HDAC5, HDAC6, HDAC7, HDAC8, HDAC9, HDAC10, HDAC11	1
CUDC-101	HDAC1, HDAC2, HDAC3, HDAC4, HDAC5, HDAC6, HDAC7, HDAC8, HDAC9, HDAC10, HDAC11	4
CUDC-907	HDAC1, HDAC2, HDAC3, HDAC4, HDAC5, HDAC6, HDAC7, HDAC8, HDAC9, HDAC10, HDAC11	6
DACINOSTAT	HDAC1, HDAC2, HDAC3, HDAC4, HDAC5, HDAC6, HDAC7, HDAC8, HDAC9, HDAC10, HDAC11	0
PANOBINOSTAT	HDAC1, HDAC2, HDAC3, HDAC4, HDAC5, HDAC6, HDAC7, HDAC8, HDAC9, HDAC10, HDAC11	138
QUISINOSTAT	HDAC1, HDAC2, HDAC3, HDAC4, HDAC5, HDAC6, HDAC7, HDAC8, HDAC9, HDAC10, HDAC11	6
TRICHOSTATIN	HDAC1, HDAC2, HDAC3, HDAC4, HDAC5, HDAC6, HDAC7, HDAC8, HDAC9, HDAC10, HDAC11	0
VORINOSTAT	HDAC1, HDAC2, HDAC3, HDAC4, HDAC5, HDAC6, HDAC7, HDAC8, HDAC9, HDAC10, HDAC11	258
SCRIPTAID	HDAC1, HDAC2, HDAC3, HDAC4, HDAC5, HDAC6, HDAC8, HDAC9, HDAC10	0
CHEMBL491316	HDAC1, HDAC2, HDAC3, HDAC4, HDAC5, HDAC6, HDAC8, HDAC9, HDAC10, HDAC11	0
ROMIDEPSIN	HDAC1, HDAC2, HDAC3, HDAC4, HDAC5, HDAC6, HDAC8, HDAC9, HDAC10, HDAC11	91
APICIDIN	HDAC1, HDAC2, HDAC3, HDAC4, HDAC6, HDAC8	0
CHEMBL1801250	HDAC1, HDAC2, HDAC3, HDAC5	0
CHEMBL1213492/GIVINOSTAT	HDAC1, HDAC2, HDAC3, HDAC5, HDAC6, HDAC7, HDAC8, HDAC9	17
OXAMFLATIN	HDAC1, HDAC2, HDAC3, HDAC6, HDAC7, HDAC8	0
ACY-241	HDAC1, HDAC2, HDAC3, HDAC6, HDAC8	4
TUBACIN	HDAC1, HDAC2, HDAC3, HDAC6, HDAC8, , HDAC9, HDAC10, HDAC11	0
ABEXINOSTAT	HDAC1, HDAC2, HDAC3, HDAC6, HDAC8, HDAC10	6
RICOLINOSTAT	HDAC1, HDAC2, HDAC3, HDAC6, HDAC8, HDAC10	11
CHR-3996	HDAC1, HDAC2, HDAC3, HDAC8	1
tefinostat/CHR-2845	HDAC1, HDAC2, HDAC3, HDAC8	2
TUCIDINOSTAT	HDAC1, HDAC2, HDAC3, HDAC9	30
PYROXAMIDE	HDAC1, HDAC3, HDAC6, HDAC8	1
CHEMBL491491	HDAC1, HDAC8	0
CHEMBL3110004	HDAC4, HDAC5, HDAC7, HDAC9	0
KA2507	HDAC6	1
NEXTURASTAT A	HDAC6, HDAC8	0
CHEMBL257991	SIRT1	0
CHEMBL420311	SIRT1	0
SRT2104	SIRT1	14
SRT2379	SIRT1	3
