# Supplementary material for: Genomic characterization of genes encoding histone acetylation modulator proteins identifies therapeutic targets for cancer treatment
Source: Nat Commun. 2019 Feb 13;10:733. doi: 10.1038/s41467-019-08554-x (PMC6374416; doi:10.1038/s41467-019-08554-x)
Supplement: Supplementary file 26 — Supplementary Data 24 [file 41467_2019_8554_MOESM26_ESM.xlsx]

## Sheet: Supplementary Table 24
Supplementary Data 24. List of the NES (normalized enrichment score) of BRD9-associated molecular pathways identified by Guilt-by-Association (GBA) analysis
Pathway	PanCnacer	BLCA	LUSC	HNSC	STAD	ACC	BRCA	OV	CESC	UCEC
KEGG_SPLICEOSOME	2.1913	1.86617	1.74544	1.8868	1.91684	1.97521	1.92094	1.4108	1.47326	2.08151
KEGG_DNA_REPLICATION	2.08677	1.92421		1.98583	1.81596	1.75914	1.76005	1.54968		2.10355
KEGG_CELL_CYCLE	2.02686	1.63188		1.38632	1.59736	1.5443	1.31626	1.43119		1.91085
KEGG_HOMOLOGOUS_RECOMBINATION	1.75971	1.79073		1.87335	1.73271	1.47684		1.56338	1.50511	1.7824
KEGG_BASE_EXCISION_REPAIR	1.85876	1.66465		1.77985	1.52898	1.6114	1.59324			1.71282
KEGG_RNA_POLYMERASE	1.49335	1.36862		1.55369	1.43955	1.61746	1.48281			1.90238
KEGG_RNA_DEGRADATION	1.7631	1.57984		1.40819		1.56841			1.5576	1.46933
KEGG_MISMATCH_REPAIR	1.73585	1.71216		1.76106		1.47082		1.45536		1.72133
KEGG_PYRIMIDINE_METABOLISM	1.59238	1.42554		1.48558		1.50397	1.41941
KEGG_NUCLEOTIDE_EXCISION_REPAIR	1.57677	1.59951		1.53259		1.82045				1.43917
KEGG_PROGESTERONE_MEDIATED_OOCYTE_MATURATION	1.4329	1.33567				1.53567			1.66658	1.54251
KEGG_BASAL_TRANSCRIPTION_FACTORS	1.51282	1.45025		1.44689		1.56174
KEGG_MTOR_SIGNALING_PATHWAY		1.38376				1.47871		1.45091	1.39131
KEGG_NOTCH_SIGNALING_PATHWAY	1.48007						1.36847			1.57176
KEGG_LYSINE_DEGRADATION		1.5105						1.41607		1.50911
KEGG_UBIQUITIN_MEDIATED_PROTEOLYSIS		1.38087				1.70614			1.46609
KEGG_OOCYTE_MEIOSIS		1.41515				1.3967
KEGG_RIBOSOME				1.38065			1.60154
KEGG_PURINE_METABOLISM				1.31308		1.32006
KEGG_SMALL_CELL_LUNG_CANCER						1.39053			1.38403
KEGG_BASAL_CELL_CARCINOMA							1.47148			1.67966
KEGG_AXON_GUIDANCE									1.48955	1.53969
KEGG_AMINOACYL_TRNA_BIOSYNTHESIS	1.49202
KEGG_GLYCOSYLPHOSPHATIDYLINOSITOL_GPI_ANCHOR_BIOSYNTHESIS				1.46346
KEGG_REGULATION_OF_AUTOPHAGY						1.62208
KEGG_PROTEIN_EXPORT						1.61687
KEGG_CYTOSOLIC_DNA_SENSING_PATHWAY						1.60502
KEGG_N_GLYCAN_BIOSYNTHESIS						1.57629
KEGG_PROTEASOME						1.47987
KEGG_THYROID_CANCER						1.46266
KEGG_RIG_I_LIKE_RECEPTOR_SIGNALING_PATHWAY						1.44489
KEGG_COLORECTAL_CANCER						1.42481
KEGG_B_CELL_RECEPTOR_SIGNALING_PATHWAY						1.32351
KEGG_T_CELL_RECEPTOR_SIGNALING_PATHWAY						1.27559
KEGG_NEUROTROPHIN_SIGNALING_PATHWAY						1.22933
KEGG_PRIMARY_IMMUNODEFICIENCY							1.54077
KEGG_TASTE_TRANSDUCTION								1.50902
KEGG_ABC_TRANSPORTERS								1.46216
KEGG_ADHERENS_JUNCTION									1.7338
KEGG_FOCAL_ADHESION									1.3902
KEGG_INSULIN_SIGNALING_PATHWAY									1.38553
KEGG_PATHWAYS_IN_CANCER									1.27259
KEGG_MELANOGENESIS										1.47406
KEGG_WNT_SIGNALING_PATHWAY										1.40172
